# Supplementary material for: Association between maternal multimorbidity and preterm birth, low birth weight and small for gestational age: a prospective birth cohort study from the Japan Environment and Children’s Study
Source: PubMed Central journal article supplement — BMJ Open. 2023 Mar 15;13(3):e069281. doi: 10.1136/bmjopen-2022-069281 (PMC10030623; doi:10.1136/bmjopen-2022-069281), 2023-03-15
Supplement: bmjopen-2022-069281.draft_revisions.pdf [file bmjopen-2022-069281.draft_revisions.pdf]

# BMJ Open

BMJ Open is committed to open peer review. As part of this commitment we make the peer review history of every article we publish publicly available.

When an article is published we post the peer reviewers' comments and the authors' responses online. We also post the versions of the paper that were used during peer review. These are the versions that the peer review comments apply to.

The versions of the paper that follow are the versions that were submitted during the peer review process. They are not the versions of record or the final published versions. They should not be cited or distributed as the published version of this manuscript.

BMJ Open is an open access journal and the full, final, typeset and author-corrected version of record of the manuscript is available on our site with no access controls, subscription charges or pay-per-view fees (<http://bmjopen.bmj.com>).

If you have any questions on BMJ Open's open peer review process please email [info.bmjopen@bmj.com](mailto:info.bmjopen@bmj.com)

# BMJ Open

## Maternal multimorbidity and adverse perinatal outcomes: The Japan Environment and Children's Study

|                               |                                                                                                                                                                                                                                                                                                                                                                                                                                                                                                                                                                                                                                                                                                                                                                                                                                                                                                                                                                                                                                              |
|-------------------------------|----------------------------------------------------------------------------------------------------------------------------------------------------------------------------------------------------------------------------------------------------------------------------------------------------------------------------------------------------------------------------------------------------------------------------------------------------------------------------------------------------------------------------------------------------------------------------------------------------------------------------------------------------------------------------------------------------------------------------------------------------------------------------------------------------------------------------------------------------------------------------------------------------------------------------------------------------------------------------------------------------------------------------------------------|
| Journal:                      | <i>BMJ Open</i>                                                                                                                                                                                                                                                                                                                                                                                                                                                                                                                                                                                                                                                                                                                                                                                                                                                                                                                                                                                                                              |
| Manuscript ID                 | bmjopen-2022-069281                                                                                                                                                                                                                                                                                                                                                                                                                                                                                                                                                                                                                                                                                                                                                                                                                                                                                                                                                                                                                          |
| Article Type:                 | Original research                                                                                                                                                                                                                                                                                                                                                                                                                                                                                                                                                                                                                                                                                                                                                                                                                                                                                                                                                                                                                            |
| Date Submitted by the Author: | 16-Oct-2022                                                                                                                                                                                                                                                                                                                                                                                                                                                                                                                                                                                                                                                                                                                                                                                                                                                                                                                                                                                                                                  |
| Complete List of Authors:     | Nakanishi, Kentaro; Asahikawa Medical University,<br>Saijo, Yasuaki; Asahikawa Medical University, Department of Social<br>Medicine<br>Yoshioka, Eiji ; Asahikawa Medical University, Department of Social<br>Medicine<br>Sato, Yukihiro; Asahikawa Medical University, Department of Social<br>Medicine<br>Kato, Yasuhito; Asahikawa Medical University, Department of Obstetrics<br>and Gynecology; Asahikawa Medical University, Department of Social<br>Medicine<br>Nagaya, Ken; Asahikawa Medical University Hospital<br>Takahashi, Satoru; Asahikawa Medical University, Department of<br>Pediatrics<br>Ito, Yoshiya; Japanese Red Cross Hokkaido College of Nursing<br>Kobayashi, Sumitaka; Hokkaido University, Center for Environmental and<br>Health Sciences<br>Miyashita, Chihiro; Hokkaido Daigaku, Center for Environmental and<br>Health Sciences<br>Araki, Atsuko; Hokkaido Daigaku, Center for Environmental and Health<br>Sciences; Hokkaido Daigaku, Graduate school of Health Sciences<br>Kishi, Reiko; Hokkaido Daigaku |
| Keywords:                     | EPIDEMIOLOGY, OBSTETRICS, Fetal medicine < OBSTETRICS, Maternal<br>medicine < OBSTETRICS                                                                                                                                                                                                                                                                                                                                                                                                                                                                                                                                                                                                                                                                                                                                                                                                                                                                                                                                                     |
|                               |                                                                                                                                                                                                                                                                                                                                                                                                                                                                                                                                                                                                                                                                                                                                                                                                                                                                                                                                                                                                                                              |

SCHOLARONE™  
Manuscripts

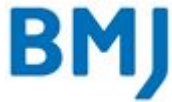

I, the Submitting Author has the right to grant and does grant on behalf of all authors of the Work (as defined in the below author licence), an exclusive licence and/or a non-exclusive licence for contributions from authors who are: i) UK Crown employees; ii) where BMJ has agreed a CC-BY licence shall apply, and/or iii) in accordance with the terms applicable for US Federal Government officers or employees acting as part of their official duties; on a worldwide, perpetual, irrevocable, royalty-free basis to BMJ Publishing Group Ltd ("BMJ") its licensees and where the relevant Journal is co-owned by BMJ to the co-owners of the Journal, to publish the Work in this journal and any other BMJ products and to exploit all rights, as set out in our [licence](#).

The Submitting Author accepts and understands that any supply made under these terms is made by BMJ to the Submitting Author unless you are acting as an employee on behalf of your employer or a postgraduate student of an affiliated institution which is paying any applicable article publishing charge ("APC") for Open Access articles. Where the Submitting Author wishes to make the Work available on an Open Access basis (and intends to pay the relevant APC), the terms of reuse of such Open Access shall be governed by a Creative Commons licence – details of these licences and which [Creative Commons](#) licence will apply to this Work are set out in our licence referred to above.

Other than as permitted in any relevant BMJ Author's Self Archiving Policies, I confirm this Work has not been accepted for publication elsewhere, is not being considered for publication elsewhere and does not duplicate material already published. I confirm all authors consent to publication of this Work and authorise the granting of this licence.

1  
2  
3  
4  
5  
6  
7 **Title: Maternal multimorbidity and adverse perinatal outcomes: The Japan**

8  
9 **Environment and Children's Study**

10  
11  
12  
13  
14  
15 **Author names**

16  
17  
18 Kentaro Nakanishi<sup>a</sup>, Yasuaki Saijo<sup>b</sup>, Eiji Yoshioka<sup>b</sup>, Yukihiro Sato<sup>b</sup>, Yasuhito Kato<sup>a,b</sup>,

19  
20  
21 Ken Nagaya<sup>c</sup>, Satoru Takahashi<sup>d</sup>, Yoshiya Ito<sup>e</sup>, Sumitaka Kobayashi<sup>f</sup>, Chihiro

22  
23  
24 Miyashita<sup>f</sup>, Atsuko Ikeda-Araki<sup>f,g</sup>, Reiko Kishi<sup>f</sup>, the Japan Environment and Children's

25  
26  
27 Study (JECS) Group<sup>h</sup>

28  
29  
30  
31  
32  
33 **Author affiliations**

34  
35  
36 <sup>a</sup>Department of Obstetrics and Gynecology, Asahikawa Medical University, Asahikawa,

37  
38  
39 1-1-1, Midorigaoka higashi2-jo, Asahikawa, Hokkaido 078-8510, Japan

40  
41  
42 <sup>b</sup>Division of Public Health and Epidemiology, Department of Social Medicine,

43  
44  
45 Asahikawa Medical University, 1-1-1, Midorigaoka higashi2-jo, Asahikawa, Hokkaido

46  
47  
48 078-8510, Japan

49  
50  
51 <sup>c</sup>Division of Neonatology, Perinatal Medical Center, Asahikawa Medical University

52  
53  
54 Hospital, 1-1-1, Midorigaoka higashi2-jo, Asahikawa, Hokkaido 078-8510, Japan

55  
56  
57 <sup>d</sup>Department of Pediatrics, Asahikawa Medical University, 1-1-1, Midorigaoka

1  
2  
3  
4  
5  
6  
7 higashi2-jo, Asahikawa, Hokkaido 078-8510, Japan

8  
9<sup>e</sup>Faculty of Nursing, Japanese Red Cross Hokkaido College of Nursing, 664-1,

10  
11  
12 Akebono-cho, Kitami, Hokkaido 090-0011, Japan

13  
14  
15<sup>f</sup>Center for Environmental and Health Sciences, Hokkaido University, Kita12-jo,

16  
17  
18 Nishi7-chome, Kita-ku, Sapporo, Hokkaido 060-0812, Japan

19  
20  
21<sup>g</sup>Faculty of Health Sciences, Hokkaido University, Kita12-jo, Nishi5-chome, Kita-ku,

22  
23  
24 Sapporo, Hokkaido 060-0812, Japan

25  
26  
27<sup>h</sup>Members of the Japan Environment and Children's Study Group are listed in the

28  
29  
30 Appendices.

31  
32  
33  
34  
35  
36 **Corresponding author**

37  
38  
39 Yasuaki Saijo

40  
41  
42 Division of Public Health and Epidemiology, Department of Social Medicine,

43  
44  
45 Asahikawa Medical University

46  
47  
48 078-8510, 1-1-1, Midorigaoka higashi2-jo, Asahikawa, Hokkaido, Japan

49  
50  
51 Tel: +81-166-68-2402

52  
53  
54 Email: y-saijo@asahikawa-med.ac.jp

## ABSTRACT

**Objectives:** Multimorbidity is defined as the coexistence of two or more chronic physical or psychological conditions within an individual. The association between maternal multimorbidity and adverse perinatal outcomes such as preterm delivery and low birth weight has not been well studied. Therefore, this study aimed to investigate this association.

**Methods:** We conducted a prospective cohort study using data from the Japan Environment and Children's Study of pregnant women between 2011 and 2014. Those with data on chronic maternal conditions were included in the study and categorized as having no chronic condition, one chronic condition, or multimorbidities. The primary outcomes were the incidence of preterm birth (PTB), low birth weight (LBW), and small for gestational age (SGA). Adjusted logistic regression was performed to estimate odds ratios (aORs) and 95% confidence intervals (CIs).

**Results:** Of the 104,062 fetal records, 86,885 singleton pregnant women were analyzed. The median maternal age and body mass index were 31 years and 20.5 kg/m<sup>2</sup>, respectively. The prevalence of pregnant women with one or more chronic conditions was 34.6%. The prevalence of maternal multimorbidity was 3.7%, and that of PTB, LBW, and SGA were 4.6%, 8.1%, and 7.5%, respectively. Pre-pregnancy underweight women were the most

1  
2  
3  
4  
5  
6 common, observed in 15.6% of multimorbidity cases, followed by maternal obesity in  
7  
8  
9 10.9%. Maternal multimorbidity was significantly associated with PTB (aOR, 1.76; 95%  
10  
11  
12 CI, 1.53-2.03), LBW (aOR, 1.58; 95% CI, 1.41-1.77), and SGA (aOR, 1.30; 95% CI,  
13  
14  
15 1.15-1.47).

16  
17  
18 **Conclusion:** Maternal multimorbidity was associated with adverse perinatal outcomes,  
19  
20  
21 including PTB, LBW, and SGA. The risk of adverse perinatal outcomes increases with  
22  
23  
24 an increase in the number of chronic maternal conditions. Multimorbidity is becoming  
25  
26  
27 more prevalent among pregnant women, making our findings important for preconception  
28  
29  
30 counseling.  
31

32  
33  
34  
35  
36 **Keywords:** chronic diseases, Japan, low birth weight, multimorbidity, preterm birth,  
37  
38  
39 small for gestational age.  
40  
41

42  
43  
44  
45 **Word counts:** 3,514  
46  
47  
48  
49  
50  
51  
52  
53  
54  
55  
56  
57  
58  
59  
60

### Strengths and limitations of this study

- Maternal multimorbidity in this study included 23 chronic conditions including physical, psychological, and social morbidities to reduce the chance of missing pregnant women at a potential risk of adverse perinatal outcomes.
- This study included 100,000 Japanese mothers and neonates, which made it possible to study multimorbidity. A sufficient number of participants was needed to conduct the study on multimorbidity because of the low frequency of each chronic condition.
- The definition of multimorbidity varies among studies. The strict definition of maternal chronic condition in our study may be responsible for the lower prevalence of maternal multimorbidity than in previous studies.
- The details of the differences in risk by the combination of chronic conditions were not identified. The risk of adverse perinatal outcomes may vary depending on the combination of the chronic conditions.



## INTRODUCTION

Multimorbidity is usually defined as the coexistence of two or more chronic physical or psychological conditions within an individual.<sup>1,2</sup> Multimorbidity has attracted worldwide attention because of the increased complexity of treatment, consumption of medical care, and health care costs compared to a single disease.<sup>1,3-5</sup> Multimorbidity is also associated with high mortality, functional disability, and diminished quality of life.<sup>6-8</sup> For many countries, there is evidence that a significant proportion of the adult population suffers from multiple chronic diseases, and the rates are increasing.<sup>2,9</sup> However, the lack of uniform definitions and classifications of multimorbidity makes it difficult to ascertain their actual status. Consequently, the existing evidence is fragmented and often difficult to interpret.<sup>2</sup>

Although the prevalence of multimorbidity is highest in those aged 65 years or older, younger persons, including reproductive-age women, also represent a large proportion of those with multimorbidity from 8.7 to 18.8%.<sup>3,4,10,11</sup> Regarding pregnant women, the prevalence of multimorbidity has varied from 0.83 to 24.2%.<sup>12-14</sup> Although the prevalence of maternal multimorbidity has not been investigated in Japan, the number of pregnant women with multimorbidity is expected to increase as with maternal population ages.

1  
2  
3  
4  
5  
6  
7 The association between certain specific single maternal chronic diseases and  
8  
9 related perinatal outcomes has been well studied; however, there are only a few studies  
10  
11 on maternal multimorbidity and perinatal outcomes.<sup>12, 13, 15</sup> The 2020 systematic review  
12  
13 in low- and middle-income countries by McCauley et al. classified maternal  
14  
15 multimorbidity into three categories: physical morbidity (such as medical, infectious, and  
16  
17 obstetrical conditions), psychological morbidity (such as depression and suicidal  
18  
19 ideation), and social morbidity (such as domestic violence and substance abuse).<sup>15</sup> The  
20  
21 World Health Organization Maternal Morbidity Working Group also considered physical,  
22  
23 psychological, and social morbidity to measure maternal morbidity.<sup>16</sup> Domestic violence  
24  
25 against pregnant women has also been a social issue in Japan,<sup>17</sup> not only in low- and  
26  
27 middle-income countries.  
28  
29  
30  
31  
32  
33  
34  
35  
36  
37

38  
39 It has been widely known that maternal physical morbidity such as hypertension,  
40  
41 kidney disease, and systemic lupus erythematosus increase the risk of preterm births  
42  
43 (PTB) and low birth weight infants (LBW).<sup>18-21</sup> Moreover, maternal psychological and  
44  
45 social morbidity has been also associated with PTB and LBW.<sup>22-27</sup> In their review,  
46  
47 McCauley et al. were trying to assess the impact of each type of morbidity on women's  
48  
49 health and well-being during pregnancy and after childbirth, however, a meta-analysis of  
50  
51 the associations between multimorbidity and obstetrical complications could not be  
52  
53  
54  
55  
56  
57  
58  
59  
60

1  
2  
3  
4  
5  
6 performed because of the heterogeneity of each study.<sup>15</sup> The evidence of maternal  
7  
8  
9 multimorbidity has been insufficient because only a few studies reported the association  
10  
11  
12 between maternal multimorbidity and adverse perinatal outcomes.<sup>12, 13</sup> Additionally, a  
13  
14  
15 previous study in the United States by Admon et al. underestimated the prevalence of  
16  
17  
18 maternal multimorbidity because only eight chronic conditions were included.<sup>13</sup> There is  
19  
20  
21 a need to conduct a study covering a broad range of maternal chronic conditions to avoid  
22  
23  
24 overlooking pregnant women at risk of potentially adverse perinatal outcomes. Therefore,  
25  
26  
27 we hypothesized that the risk of adverse perinatal outcomes, such as PTB, LBW, and  
28  
29  
30 small for gestational age (SGA), would increase with the number of chronic maternal  
31  
32  
33 conditions present in a woman, including physical, psychological, and social conditions.  
34  
35

36 In Japan, the association between maternal multimorbidity and adverse perinatal  
37  
38  
39 outcomes has not yet been investigated. The present study aimed to determine the  
40  
41  
42 association between maternal multimorbidity and adverse perinatal outcomes, such as  
43  
44  
45 PTB, LBW, and SGA, using a Japanese nationwide prospective cohort study.  
46  
47  
48  
49  
50  
51  
52  
53  
54  
55  
56  
57  
58  
59  
60

## METHODS

### *Study design and participants*

This prospective cohort study used the dataset jecs-ta-20190930 from the Japan Environment and Children's Study (JECS). The JECS is an ongoing nationwide birth cohort study in Japan, the details of which have already been reported.<sup>28, 29</sup> Its main aim of the JECS was to investigate the association between environmental factors and children's health and development. The JECS recruited pregnant women from 15 regional centers selected to cover the Japanese geographical areas: Hokkaido, Miyagi, Fukushima, Chiba, Kanagawa, Koshin, Toyama, Aichi, Kyoto, Osaka, Hyogo, Tottori, Kochi, Fukuoka, and South Kyusyu/Okinawa, between January 2011 and March 2014.

During the study period, 104,062 fetal records were included in the baseline survey of the JECS. Miscarriages (n = 1,254), stillbirths (n = 382), and unknown birth outcomes (n = 2,123) were excluded, leaving 100,303 live births in the present study. After excluding pregnancies in the same mothers, there were 94,753 participants. Finally, patients with multiple pregnancies (n = 1,809), pregnancies with chromosomal abnormalities (n = 207), missing values of gestational age at delivery (n = 286), missing values of neonatal birth weight (n = 69), missing values of medication information (n = 2,166), missing values of domestic violence from intimate partners (n = 880), missing

1  
2  
3  
4  
5  
6 values of maternal infection (n = 2,418), and missing values of maternal pre-pregnancy  
7  
8  
9 body mass index (BMI) (n = 33) were excluded and the final number of study participants  
10  
11  
12 was 86,885 singleton pregnant women (Figure 1). In the SGA analyses, the number of  
13  
14  
15 participants decreased to 86,674 because 211 deliveries at a gestational age of < 22 or >  
16  
17  
18 41 weeks were excluded (Figure 1).  
19

### 20 21 22 23 24 ***Ethics***

25  
26  
27 The study protocol was approved by the Ministry of the Environment's Institutional  
28  
29  
30 Review Board on Epidemiological Studies and by the Ethics Committees of all  
31  
32  
33 participating institutions (No. 100910001).<sup>28</sup> The JECS was performed in accordance  
34  
35  
36 with the Declaration of Helsinki. All the participants provided written informed consent.  
37  
38  
39  
40  
41

### 42 43 ***Maternal and neonatal baseline information***

44  
45 Baseline information on the mothers, including educational level, smoking status, and  
46  
47  
48 alcohol consumption, was collected from self-administered questionnaires applied to the  
49  
50  
51 enrolled pregnant women during the second or third trimesters. Maternal medical history  
52  
53  
54 was obtained using self-administered questionnaires and medical record transcripts  
55  
56  
57 during the first trimester of pregnancy. A history of domestic violence from an intimate  
58  
59  
60

1  
2  
3  
4  
5  
6 partner was obtained from self-administered questionnaires applied to the enrolled  
7  
8  
9 pregnant women during the first trimester. The following maternal information was  
10  
11  
12 obtained from the medical record transcripts: maternal infection, neonate's date of birth,  
13  
14  
15 parity, and gestational period. Although maternal pre-pregnancy height and weight were  
16  
17  
18 collected from medical record transcripts, in instances where the above information was  
19  
20  
21 missing, the values were obtained from mothers' self-reports. Maternal age at delivery  
22  
23  
24 was calculated from the birth dates of mothers and neonates. Parity was categorized as 0,  
25  
26  
27 1, 2, or higher. The categories of maternal smoking status were defined as follows: never;  
28  
29  
30 previously did, but quit before recognizing the current pregnancy; previously did, but quit  
31  
32  
33 after identifying the current pregnancy; and current smoker. The categories of maternal  
34  
35  
36 alcohol consumption were defined as follows: never consumed; previously consumed,  
37  
38  
39 but quit before identifying current pregnancy; previously consumed, but quit after  
40  
41  
42 identifying current pregnancy; and current drinker. The highest educational level of the  
43  
44  
45 mother was defined as follows: junior high school, high school, technical junior college,  
46  
47  
48 technical/vocational college or associate degree, bachelor's degree, or graduate degree  
49  
50  
51 (master/doctor). Maternal and neonatal medical information, such as maternal age at  
52  
53  
54 delivery, gestational age at delivery, neonatal birth weight, and neonatal sex, were  
55  
56  
57 collected from the medical record transcripts at birth.  
58  
59  
60

### ***Exposure: Maternal Multimorbidity***

In our study, multimorbidity was defined as the coexistence of two or more physical, psychological, or social conditions in an individual according to previous reports.<sup>13-16</sup>

Maternal chronic conditions included in multimorbidity were defined as the conditions with high prevalence among reproductive-age women or that had the potential to affect perinatal outcomes. The chronic conditions in this study were heterogeneous because the JECS lacked information regarding the disease severity. However, the definition of multimorbidity varies among studies.<sup>16, 30</sup> To identify pregnant women with chronic conditions more rigorously, a maternal chronic condition was defined as a condition that was medically treated at the time of pregnancy. This information was collected from self-reports, medical record transcripts, and medication interviews. Maternal chronic conditions included allergic diseases such as asthma, anemia, diabetes mellitus, dyslipidemia, epilepsy, gastric or duodenal ulcer, heart disease, hepatitis, human immunodeficiency virus (HIV) infection, hypertension, inflammatory bowel disease, kidney disease, malignancy, migraine, neurologic disease, other sexually transmitted diseases (*Chlamydia trachomatis* and syphilis), psychiatric disorders, rheumatic or collagen diseases, and thyroid disease.

1  
2  
3  
4  
5  
6  
7  
8  
9  
10  
11  
12  
13  
14  
15  
16  
17  
18  
19  
20  
21  
22  
23  
24  
25  
26  
27  
28  
29  
30  
31  
32  
33  
34  
35  
36  
37  
38  
39  
40  
41  
42  
43  
44  
45  
46  
47  
48  
49  
50  
51  
52  
53  
54  
55  
56  
57  
58  
59  
60

Additionally, abnormal pre-pregnancy BMI, including underweight and obesity, physical or verbal domestic violence from intimate partners, and substance abuse, were included in the maternal chronic conditions.<sup>16, 31</sup> Maternal pre-pregnancy BMI was calculated from the maternal pre-pregnancy weight divided by the square of maternal height collected from medical record transcripts or self-reports. Pregnant women were categorized according to their pre-pregnancy BMI as follows: underweight (BMI < 18.5 kg/m<sup>2</sup>), normal weight (18.5 kg/m<sup>2</sup> ≤ BMI < 25.0 kg/m<sup>2</sup>), and obesity (BMI ≥ 25.0 kg/m<sup>2</sup>). Information on domestic violence from intimate partners was obtained from a questionnaire administered during the first trimester: “Have you been verbally insulted or yelled at by your partner during pregnancy?” and “Have you been physically abused, such as being slapped or beaten, resulting in injury because of a quarrel between you and your partner during pregnancy?”<sup>32</sup> Each response was selected from one of four predefined categories: never, rarely, sometimes, and often. If the response “sometimes” or “often” was chosen, it was considered as presence of domestic violence. Medication information was obtained from interviews. Medication was considered relevant from pregnancy diagnosis to 12 weeks of gestation. The types of medication in early pregnancy included antiallergic drugs, lipid-lowering drugs, antimigraine drugs, anti-parkinsonian drugs, anti-rheumatic drugs, antithyroid drugs, antiviral drugs, anti-cancer drugs, cardiovascular



1  
2  
3  
4  
5  
6 drugs, corticosteroids, gastrointestinal drugs, illegal drugs including marijuana,  
7  
8  
9 psychostimulant, ecstasy, thinner, and toluene, insulin preparations, iron preparations,  
10  
11  
12 psychoactive drugs, respiratory drugs, and thyroid hormone preparations.<sup>33</sup>  
13  
14  
15  
16  
17

### 18 ***Outcomes***

19  
20  
21 The primary outcome of this study was the incidence of adverse perinatal outcomes,  
22  
23 including PTB, LBW, and SGA. The secondary outcomes were the incidences of very  
24  
25 preterm birth (VPTB), very low birth weight (VLBW), and extremely low birth weight  
26  
27 (ELBW). PTB was defined as a gestational age of less than 37 weeks at delivery. VPTB  
28  
29 was defined as a gestational age of less than 34 weeks at delivery. LBW, VLBW, and  
30  
31 ELBW were defined as neonatal birth weights of less than 2,500 g, 1,500 g, and 1,000 g,  
32  
33 respectively. SGA was defined as birth weight below the 10<sup>th</sup> percentile, accounting for  
34  
35 parity, gestational age, and neonatal sex according to the Japan Pediatric Society  
36  
37 guidelines,<sup>34</sup> and percentiles were calculated using Excel-based clinical tools for growth  
38  
39 evaluation of children distributed by the Japanese Society for Pediatric Endocrinology.<sup>35</sup>  
40  
41  
42  
43  
44  
45  
46  
47  
48  
49  
50  
51  
52  
53

### 54 ***Statistical analysis***

55  
56  
57 In the main analyses, adjusted odds ratios (aORs) and 95% confidence intervals (CIs) for  
58  
59  
60

1  
2  
3  
4  
5  
6 adverse perinatal outcomes were estimated using a multivariable logistic regression  
7  
8  
9 model adjusted for maternal age at delivery, parity, maternal smoking status, maternal  
10  
11  
12 alcohol consumption, maternal educational level, and neonatal sex. In the SGA analyses,  
13  
14  
15 parity and neonatal sex were removed from the covariates. These covariates were selected  
16  
17  
18 based on previous studies on multimorbidity. Statistical analyses were used to compare  
19  
20  
21 pregnant women with multimorbidity or with one chronic condition, to those without  
22  
23  
24 chronic conditions as a reference group.  
25

26  
27 We used the k-nearest neighbor imputation method in the R package “VIM”  
28  
29  
30 (version 4.1.2; R Foundation for Statistical Computing, Vienna, Austria),<sup>36</sup> introducing  
31  
32  
33 all outcomes and adjusted variables because the dataset had some missing values. We  
34  
35  
36 performed an additional analysis to test the robustness of our findings using a complete  
37  
38  
39 dataset, which excluded all missing values. Sensitivity analyses focusing on underweight,  
40  
41  
42 obesity, psychiatric disorders, and domestic violence were performed. Each of these  
43  
44  
45 chronic conditions was categorized separately as included or not included in the  
46  
47  
48 multimorbidity category. The results of these analyses are shown in Supplementary  
49  
50  
51 Tables 1 and 2. Statistical significance was defined as a two-tailed *P*-value < 0.05. All  
52  
53  
54 analyses, except k-nearest neighbor imputation, were performed using STATA version  
55  
56  
57 16.1, for Windows (Stata Corporation, College Station, TX, USA). K-nearest neighbor  
58  
59  
60

1  
2  
3  
4  
5  
6  
7  
8  
9  
10  
11  
12  
13  
14  
15  
16  
17  
18  
19  
20  
21  
22  
23  
24  
25  
26  
27  
28  
29  
30  
31  
32  
33  
34  
35  
36  
37  
38  
39  
40  
41  
42  
43  
44  
45  
46  
47  
48  
49  
50  
51  
52  
53  
54  
55  
56  
57  
58  
59  
60

imputation was conducted using R (version 4.1.2; R Foundation for Statistical Computing, Vienna, Austria).

For peer review only

## RESULTS

The maternal characteristics are shown in Table 1. The median maternal age was 31 years (range, 14-48), and the median pre-pregnancy BMI was 20.5 kg/m<sup>2</sup> (range, 13.2-52.8). In the present study, 34.6% of pregnant women had one or more chronic conditions (Table 1). The prevalence of maternal multimorbidity was 3.7% (3,237/86,885). Regarding perinatal outcomes, the prevalences of PTB and VPTB were 4.6% and 1.0%, respectively. The prevalences of LBW, VLBW, ELBW, and SGA were 8.1 %, 0.6%, 0.2%, and 7.5 %, respectively (Table 2). The details of the maternal chronic conditions are shown in Table 3. Maternal underweight (15.6%) was the most frequently observed in chronic conditions, followed by maternal obesity (10.9%). The prevalence of domestic violence was 4.6%. The other most frequent chronic conditions were allergic diseases (3.1%), other sexually transmitted diseases (1.4%), anemia (0.7%), psychiatric disorders (0.7%), and thyroid disease (0.7%).

Maternal multimorbidity was significantly associated with PTB (aOR, 1.76; 95% CI, 1.53-2.03), VPTB (aOR, 1.49; 95% CI, 1.09-2.05), LBW (aOR, 1.58; 95% CI, 1.41-1.77), VLBW (aOR, 1.53; 95% CI, 1.01-2.34), and SGA (aOR, 1.30; 95% CI, 1.15-1.47) (Table 4). Adjusted odds ratios of PTB, LBW, and SGA tended to increase with multimorbidity rather than with one chronic condition. ELBW was not significantly

1  
2  
3  
4  
5  
6 associated with maternal multimorbidities (Table 4).  
7  
8

9 The association between maternal multimorbidity and adverse perinatal  
10 outcomes, using the complete dataset, is shown in Supplementary Table 1. Maternal  
11 multimorbidity was also significantly associated with PTB, LBW, and SGA, however, it  
12 was not associated with VPTB and VLBW. Additionally, the aORs of PTB, LBW, and  
13 SGA also tended to increase with multimorbidity rather than with one chronic condition.  
14  
15  
16  
17  
18  
19  
20  
21  
22  
23

24 Supplementary Table 2 demonstrates the aOR for adverse perinatal outcomes,  
25 focusing on each disease, including underweight, obesity, psychiatric disorders, and  
26 domestic violence. Regarding PTB and LBW, significant differences were found between  
27 maternal multimorbidity and no chronic conditions, regardless of the presence or absence  
28 of specific chronic conditions (Supplementary Table 2A-D). For SGA, maternal  
29 multimorbidity with underweight, without obesity, without psychiatric disorder, and with  
30 and without domestic violence showed significant differences compared to no chronic  
31 conditions (Supplementary Table 2A-D). However, multimorbidity without underweight  
32 and that with obesity and psychiatric disorders did not show significant differences  
33 (Supplementary Tables 2A, B, and C).  
34  
35  
36  
37  
38  
39  
40  
41  
42  
43  
44  
45  
46  
47  
48  
49  
50  
51  
52  
53  
54  
55  
56  
57  
58  
59  
60

## DISCUSSION

In this study, one-third of pregnant women had one or more chronic conditions, and the prevalence of maternal multimorbidity was lower than that in previous studies.<sup>3, 4</sup> Among maternal chronic conditions, pre-pregnancy underweight was the most common, followed by pre-pregnancy obesity and domestic violence. This study showed that maternal multimorbidity was significantly associated with adverse perinatal outcomes including PTB, LBW, and SGA. The risk of adverse perinatal outcomes increases with the number of chronic conditions in the mother.

To our knowledge, the present study is the first to investigate the association between maternal multimorbidity, including physical, psychological, and social morbidities, with perinatal outcomes. In the present study, the use of data from the JECS, including 100,000 Japanese mothers and neonates, made it possible to study multimorbidities. A sufficient number of participants was needed to conduct the study on multimorbidity because of the low frequency of each chronic condition.

However, this study has several limitations. First, the prevalence of maternal multimorbidity in this study was 3.7%, which was lower than the prevalence noted in reproductive-aged women in previous studies.<sup>3, 4, 12, 14</sup> The strict definition of a chronic condition in our study may be responsible for the lower prevalence of maternal

1  
2  
3  
4  
5  
6  
7  
8  
9  
10  
11  
12  
13  
14  
15  
16  
17  
18  
19  
20  
21  
22  
23  
24  
25  
26  
27  
28  
29  
30  
31  
32  
33  
34  
35  
36  
37  
38  
39  
40  
41  
42  
43  
44  
45  
46  
47  
48  
49  
50  
51  
52  
53  
54  
55  
56  
57  
58  
59  
60

multimorbidity than in previous studies. However, there is no consensus on the definition of maternal multimorbidity or classification system for reporting.<sup>2, 30</sup> Second, the details of the differences in risk by the combination of chronic conditions were not identified. The risk of adverse perinatal outcomes may vary depending on the combination of the chronic conditions. Although sensitivity analyses focusing on underweight, obesity, psychiatric disorders, and domestic violence demonstrated the association of adverse perinatal outcomes with the presence or absence of each condition, no further detailed studies were conducted because the main aim of this study was not to examine the impact of each chronic condition. Third, the numbers of VPTB, VLBW, and ELBW cases were small. For VLBW and ELBW, although the risk of adverse perinatal outcomes was similar between chronic conditions and multimorbidity, a larger number of cases may show a significant difference between the two groups.

Conducting studies on maternal multimorbidity has been challenging because there is no agreed definition or uniform measurement tool for multimorbidity.<sup>30</sup> A systematic review of multimorbidity in 2012 by Fortin et al.<sup>3</sup> reported that the prevalence of multimorbidity seemed to be influenced by the operational definition of chronic conditions. Moreover, most studies on multimorbidity conducted in the general population predominantly used questionnaires. As this method was based on self-report,

1  
2  
3  
4  
5  
6  
7 it might present the disadvantage of assigning equal weight to both major and minor  
8  
9 chronic conditions.<sup>3</sup> Although the present study also used self-report questionnaires,  
10  
11 multimorbidity was defined as chronic conditions treated with medication to reduce the  
12  
13 variability in the severity of chronic conditions in multimorbidity. However, our method  
14  
15  
16  
17  
18  
19 may have decreased the prevalence of multimorbidities.

20  
21 This study comprised 23 chronic conditions, which included not only physical  
22  
23 morbidity, but also psychological and social morbidity. A systematic review of  
24  
25 multimorbidity by Fortin et al.<sup>3</sup> suggested using a list of at least the 12 most prevalent  
26  
27 chronic conditions to conduct studies on multimorbidity. In a previous study by Admon  
28  
29 et al.<sup>13</sup> on maternal multimorbidity, only seven physical and one social morbidity were  
30  
31 defined as chronic conditions, and the prevalence of one chronic condition and  
32  
33 multimorbidity were 8.4% and 0.83%, respectively. These values are much lower than  
34  
35 those of our results. Although it has been controversial which chronic conditions should  
36  
37 be included in maternal multimorbidity, our study may have reduced the chance of  
38  
39 missing pregnant women at a potential risk of adverse perinatal outcomes.  
40  
41  
42  
43  
44  
45  
46  
47  
48  
49

50  
51 The present study confirmed that an increase in the number of chronic maternal  
52  
53 conditions increases the risk of PTB, LBW, and SGA. In a study on chronic diseases in  
54  
55 pregnant women in Germany, pregnant women with at least one chronic condition had an  
56  
57  
58  
59  
60



1  
2  
3  
4  
5  
6 increased risk of PTB.<sup>12</sup> A study on maternal multimorbidity in the United States reported  
7  
8  
9 that the incidence of PTB less than 37 weeks of gestation, cesarean delivery, severe  
10  
11  
12 maternal morbidity, and mortality in pregnant women with multimorbidity was higher  
13  
14  
15 than those without chronic conditions.<sup>13</sup> These results were consistent with the present  
16  
17  
18 study, although the definition of maternal chronic conditions was different from our study.  
19

20  
21  
22       Chronic physical conditions such as hypertension, kidney disease, systemic  
23  
24 lupus erythematosus, and abnormal pre-pregnancy BMI are associated with adverse  
25  
26 perinatal outcomes.<sup>18-21, 37, 38</sup> Our findings also indicated that multimorbidity might alter  
27  
28 the risk of PTB, LBW, and SGA depending on whether multimorbidity included or did  
29  
30 not include abnormal BMI. Additionally, maternal infections, such as HIV, malaria,  
31  
32 syphilis, and tuberculosis, have been reported to be associated with adverse perinatal  
33  
34 outcomes.<sup>39-42</sup> However, the influence of these infections may be small in the present  
35  
36  
37 study because the prevalence of these maternal infections was very low in Japan.  
38  
39  
40  
41  
42  
43  
44

45  
46       Although the prevalence of psychiatric disorders was 0.7% in the present study,  
47  
48 which was very low compared to a previous systematic review of adult women,<sup>43</sup> maternal  
49  
50 psychological morbidity was also associated with adverse perinatal outcomes.<sup>23, 24, 44</sup> The  
51  
52  
53 present study also showed that the risk of PTB and SGA might vary depending on the  
54  
55  
56 presence or absence of psychiatric disorders. In previous studies on depression during  
57  
58  
59  
60

1  
2  
3  
4  
5  
6 pregnancy, depression was found to be associated with PTB, LBW, and SGA.<sup>23, 24</sup> In  
7  
8  
9 addition, common antenatal mental disorders also increased the risk of PTB and LBW.<sup>44</sup>  
10

11  
12 In the present study, domestic violence from intimate partners was the third most  
13  
14 frequent chronic condition at 4.6%. Multimorbidity with and without domestic violence  
15  
16 was significantly associated with PTB, LBW, and SGA, although the point estimate of  
17  
18 the aOR for multimorbidity with domestic violence was slightly smaller than the aOR for  
19  
20 those without domestic violence in this study. Social morbidity, including domestic  
21  
22 violence, has been highlighted as a risk factor associated with adverse perinatal  
23  
24 outcomes.<sup>15, 26, 27</sup> A cross-sectional study in Iran found a significant association between  
25  
26 intimate partner violence during pregnancy and PTB.<sup>26</sup> A prospective cohort study in  
27  
28 Tanzania reported that physical violence during pregnancy significantly increased the risk  
29  
30 of PTB and LBW.<sup>27</sup> However, a population-based study in Canada reported no  
31  
32 association between domestic violence before and during pregnancy and adverse perinatal  
33  
34 outcomes, including PTB and SGA.<sup>45</sup> This previous study had the limitation that the  
35  
36 prevalence of domestic violence was 10.9% and only 3.3% occurred during pregnancy.<sup>45</sup>  
37  
38  
39  
40  
41  
42  
43  
44  
45  
46  
47  
48  
49  
50

51 The mechanism by which maternal multimorbidity affected perinatal outcomes  
52  
53 was not clear in the present study. Although previous studies reported that each chronic  
54  
55 condition, including physical, psychological, and social conditions, increased the risk of  
56  
57  
58  
59  
60

1  
2  
3  
4  
5  
6 adverse perinatal outcomes, evidence on maternal multimorbidity is lacking.<sup>2</sup> Based on  
7  
8  
9 the results of our study, we hypothesized that each chronic condition that composes  
10  
11  
12 multimorbidity, such as underweight, obesity, psychiatric disorder, and domestic violence,  
13  
14  
15 provides a risk for PTB, and the combination of these chronic conditions might further  
16  
17  
18 increase the risk of adverse perinatal outcomes.  
19

## 20 21 22 23 24 **CONCLUSIONS**

25  
26  
27 The present study reported an association between maternal multimorbidity and adverse  
28  
29  
30 perinatal outcomes including PTB, LBW, and SGA. The risk of adverse perinatal  
31  
32  
33 outcomes increases with an increase in the number of chronic maternal conditions. Since  
34  
35  
36 the number of reproductive-aged women with multimorbidity has been increasing as the  
37  
38  
39 maternal population ages, preconception care for maternal multimorbidity is becoming  
40  
41  
42 increasingly important. Our findings provide essential information for preconception  
43  
44  
45 counseling in women with multimorbidities.  
46  
47  
48  
49  
50  
51  
52  
53  
54  
55  
56  
57  
58  
59  
60

## Acknowledgements

We would like to express our gratitude to all the JECS study participants and all staff members involved in data collection. Members of the JECS Group as of 2021: Michihiro Kamijima (principal investigator, Nagoya City University, Nagoya, Japan), Shin Yamazaki (National Institute for Environmental Studies, Tsukuba, Japan), Yukihiro Ohya (National Center for Child Health and Development, Tokyo, Japan), Reiko Kishi (Hokkaido University, Sapporo, Japan), Nobuo Yaegashi (Tohoku University, Sendai, Japan), Koichi Hashimoto (Fukushima Medical University, Fukushima, Japan), Chisato Mori (Chiba University, Chiba, Japan), Shuichi Ito (Yokohama City University, Yokohama, Japan), Zentaro Yamagata (University of Yamanashi, Chuo, Japan), Hidekuni Inadera (University of Toyama, Toyama, Japan), Takeo Nakayama (Kyoto University, Kyoto, Japan), Hiroyasu Iso (Osaka University, Suita, Japan), Masayuki Shima (Hyogo College of Medicine, Nishinomiya, Japan), Hiroshige Nakamura (Tottori University, Yonago, Japan), Narufumi Suganuma (Kochi University, Nankoku, Japan), Koichi Kusuhara (University of Occupational and Environmental Health, Kitakyushu, Japan), and Takahiko Katoh (Kumamoto University, Kumamoto, Japan).

We would like to thank Editage ([www.editage.com](http://www.editage.com)) for the English language editing.

## Contributors

KN and YaS designed the study. YaS, EY, KN, ST, YI, SK, CM, AA, and RK collected data. KN and YaS conducted the data analysis. KN, YaS, EY, YuS, YK, KN, ST, YI, SK, CM, AA, and RK contributed to the data interpretation. YaS, EY, YuS, YK, KN, ST, YI, SK, CM, AA, and RK conducted the critical reviews. KN drafted the manuscript. YaS made critical revisions. All authors reviewed and commented on the manuscript. All authors approved the final manuscript.

## Funding statement

This study was funded by the Ministry of Environment of Japan. The findings and conclusions of this article are solely the responsibility of the authors and do not represent the official views of the government.

## Competing interests

The authors declare that they have no competing interests.

## Patient and public involvement

Patients and/or the public were not involved in the design, or conduct, or reporting, or

1  
2  
3  
4  
5  
6 dissemination plans of this research.  
7  
8  
9

10  
11  
12 **Patient consent for publication**  
13

14  
15 Not applicable.  
16  
17

18  
19  
20  
21 **Ethics approval**  
22

23  
24 The study protocol was approved by the Ministry of the Environment'S Institutional  
25  
26  
27 Review Board on Epidemiological Studies and by the Ethics Committees of all  
28  
29  
30 participating institutions (No. 100910001). The JECS was performed in accordance with  
31  
32  
33 the Declaration of Helsinki. All the participants provided written informed consent.  
34  
35  
36  
37  
38

39  
40 **Provenance and peer review**  
41

42 Not commissioned; externally peer reviewed.  
43  
44  
45  
46  
47

48  
49 **Data availability statement**  
50

51 Data are unsuitable for public deposition because of ethical restrictions and Japan's legal  
52  
53  
54 framework. The Act on the Protection of Personal Information (Act No. 57 of May 30,  
55  
56  
57 2003, amended on September 9, 2015) prohibits making data containing personal  
58  
59  
60

1  
2  
3  
4  
5  
6 information publicly available. The Ethical Guidelines for Medical and Health Research  
7  
8  
9 Involving Human Subjects enforced by the Japan Ministry of Education, Culture, Sports,  
10  
11  
12 Science and Technology and the Ministry of Health, Labour and Welfare also restrict the  
13  
14  
15 open sharing of epidemiological data. All inquiries about access to data were sent to jecs-  
16  
17  
18 en@nies.go.jp. The person responsible for handling inquiries sent to this e-mail address  
19  
20  
21 is Dr. Shoji F. Nakayama, JECS Program Office, National Institute for Environmental  
22  
23  
24 Studies.  
25  
26  
27  
28  
29  
30  
31  
32  
33  
34  
35  
36  
37  
38  
39  
40  
41  
42  
43  
44  
45  
46  
47  
48  
49  
50  
51  
52  
53  
54  
55  
56  
57  
58  
59  
60

## References

1. van den Akker M, Buntinx F, Metsemakers JF, Roos S, Knottnerus JA. Multimorbidity in general practice: prevalence, incidence, and determinants of co-occurring chronic and recurrent diseases. *J Clin Epidemiol*. 1998;51:367-375. doi: 10.1016/s0895-4356(97)00306-5.
2. The Academy of Medical Science. Multimorbidity: a priority for global health challenge 2018. <https://acmedsci.ac.uk/file-download/82222577>. Accessed 21 July 2022.
3. Fortin M, Stewart M, Poitras ME, Almirall J, Maddocks H. A systematic review of prevalence studies on multimorbidity: toward a more uniform methodology. *Ann Fam Med*. 2012;10:142-151. doi: 10.1370/afm.1337.
4. Barnett K, Mercer SW, Norbury M, Watt G, Wyke S, Guthrie B. Epidemiology of multimorbidity and implications for health care, research, and medical education: a cross-sectional study. *Lancet*. 2012;380:37-43. doi: 10.1016/s0140-6736(12)60240-2.
5. Brown HK, McKnight A, Aker A. Association between pre-pregnancy multimorbidity and adverse maternal outcomes: A systematic review. *J Multimorb Comorb*. 2022;12:26335565221096584. doi:



- 1  
2  
3  
4  
5  
6 10.1177/26335565221096584.  
7  
8  
9  
10 6. Gijzen R, Hoeymans N, Schellevis FG, Ruwaard D, Satariano WA, van den Bos  
11  
12 GA. Causes and consequences of comorbidity: a review. *J Clin Epidemiol*.  
13  
14 2001;54:661-674. doi: 10.1016/s0895-4356(00)00363-2.  
15  
16  
17  
18 7. Kadam UT, Croft PR. Clinical multimorbidity and physical function in older  
19  
20 adults: a record and health status linkage study in general practice. *Fam Pract*.  
21  
22 2007;24:412-419. doi: 10.1093/fampra/cmm049.  
23  
24  
25  
26  
27 8. Fortin M, Lapointe L, Hudon C, Vanasse A, Ntetu AL, Maltais D. Multimorbidity  
28  
29 and quality of life in primary care: a systematic review. *Health Qual Life*  
30  
31 *Outcomes*. 2004;2:51. doi: 10.1186/1477-7525-2-51.  
32  
33  
34  
35  
36 9. Uijen AA, van de Lisdonk EH. Multimorbidity in primary care: prevalence and  
37  
38 trend over the last 20 years. *Eur J Gen Pract*. 2008;14 Suppl 1:28-32. doi:  
39  
40 10.1080/13814780802436093.  
41  
42  
43  
44  
45 10. Rocca WA, Boyd CM, Grossardt BR, Bobo WV, Finney Rutten LJ, Roger VL, et  
46  
47 al. Prevalence of multimorbidity in a geographically defined American  
48  
49 population: patterns by age, sex, and race/ethnicity. *Mayo Clin Proc*.  
50  
51 2014;89:1336-1349. doi: 10.1016/j.mayocp.2014.07.010.  
52  
53  
54  
55  
56  
57 11. Maciejewski ML, Hammill BG. Measuring the burden of multimorbidity among  
58  
59  
60

- 1  
2  
3  
4  
5  
6 Medicare beneficiaries via condition counts and cumulative duration. *Health Serv*  
7  
8  
9 *Res.* 2019;54:484-491. doi: 10.1111/1475-6773.13124.  
10  
11  
12 12. Kersten I, Lange AE, Haas JP, Fusch C, Lode H, Hoffmann W, et al. Chronic  
13  
14 diseases in pregnant women: prevalence and birth outcomes based on the SNIp-  
15  
16 study. *BMC Pregnancy Childbirth.* 2014;14:75. doi: 10.1186/1471-2393-14-75.  
17  
18  
19 13. Admon LK, Winkelman TNA, Heisler M, Dalton VK. Obstetric outcomes and  
20  
21 delivery-related health care utilization and costs among pregnant women with  
22  
23 multiple chronic conditions. *Prev Chronic Dis.* 2018;15:E21. doi:  
24  
25 10.5888/pcd15.170397.  
26  
27  
28 14. Lee SI, Azcoaga-Lorenzo A, Agrawal U, Kennedy JI, Fagbamigbe AF, Hope H,  
29  
30 et al. Epidemiology of pre-existing multimorbidity in pregnant women in the UK  
31  
32 in 2018: a population-based cross-sectional study. *BMC Pregnancy Childbirth.*  
33  
34 2022;22:120. doi: 10.1186/s12884-022-04442-3.  
35  
36  
37 15. McCauley M, Zafar S, van den Broek N. Maternal multimorbidity during  
38  
39 pregnancy and after childbirth in women in low- and middle-income countries: a  
40  
41 systematic literature review. *BMC Pregnancy Childbirth.* 2020;20:637. doi:  
42  
43 10.1186/s12884-020-03303-1.  
44  
45  
46 16. Barreix M, Barbour K, McCaw-Binns A, Chou D, Petzold M, Gichuhi GN, et al.  
47  
48  
49  
50  
51  
52  
53  
54  
55  
56  
57  
58  
59  
60

- 1  
2  
3  
4  
5  
6  
7 Standardizing the measurement of maternal morbidity: pilot study results. *Int J*  
8  
9  
10 *Gynaecol Obstet.* 2018;141 Suppl 1:10-19. doi: 10.1002/ijgo.12464.  
11  
12  
13 17. Miura A, Fujiwara T. Intimate Partner Violence during Pregnancy and Postpartum  
14  
15 Depression in Japan: A Cross-sectional Study. *Front Public Health.* 2017;5:81.  
16  
17 doi: 10.3389/fpubh.2017.00081.  
18  
19  
20  
21 18. Al Khalaf S, Bodunde E, Maher GM, O'Reilly ÉJ, McCarthy FP, O'Shaughnessy  
22  
23 M, et al. Chronic kidney disease and adverse pregnancy outcomes: A systematic  
24  
25 review and meta-analysis. *Am J Obstet Gynecol.* 2021. doi:  
26  
27 10.1016/j.ajog.2021.10.037.  
28  
29  
30  
31  
32  
33 19. Al Khalaf SY, O'Reilly ÉJ, McCarthy FP, Kublickas M, Kublickiene K, Khashan  
34  
35 AS. Pregnancy outcomes in women with chronic kidney disease and chronic  
36  
37 hypertension: a National cohort study. *Am J Obstet Gynecol.*  
38  
39 2021;225:298.e1-.e20. doi: 10.1016/j.ajog.2021.03.045.  
40  
41  
42  
43  
44  
45 20. Agrawal A, Wenger NK. Hypertension during pregnancy. *Curr Hypertens Rep.*  
46  
47 2020;22:64. doi: 10.1007/s11906-020-01070-0.  
48  
49  
50  
51 21. Polić A, Običan SG. Pregnancy in systemic lupus erythematosus. *Birth Defects*  
52  
53 *Res.* 2020;112:1115-1125. doi: 10.1002/bdr2.1790.  
54  
55  
56  
57 22. Paarlberg KM, Vingerhoets AJ, Passchier J, Dekker GA, Van Geijn HP.  
58  
59  
60

- 1  
2  
3  
4  
5  
6  
7  
8  
9  
10  
11  
12  
13  
14  
15  
16  
17  
18  
19  
20  
21  
22  
23  
24  
25  
26  
27  
28  
29  
30  
31  
32  
33  
34  
35  
36  
37  
38  
39  
40  
41  
42  
43  
44  
45  
46  
47  
48  
49  
50  
51  
52  
53  
54  
55  
56  
57  
58  
59  
60
- Psychosocial factors and pregnancy outcome: a review with emphasis on methodological issues. *J Psychosom Res.* 1995;39:563-595. doi: 10.1016/0022-3999(95)00018-6.
23. Bonari L, Pinto N, Ahn E, Einarson A, Steiner M, Koren G. Perinatal risks of untreated depression during pregnancy. *Can J Psychiatry.* 2004;49:726-735. doi: 10.1177/070674370404901103.
24. Rahman A, Bunn J, Lovel H, Creed F. Association between antenatal depression and low birthweight in a developing country. *Acta Psychiatr Scand.* 2007;115:481-486. doi: 10.1111/j.1600-0447.2006.00950.x.
25. Wado YD, Afework MF, Hindin MJ. Effects of maternal pregnancy intention, depressive symptoms and social support on risk of low birth weight: a prospective study from southwestern Ethiopia. *PLOS ONE.* 2014;9:e96304. doi: 10.1371/journal.pone.0096304.
26. Hassan M, Kashanian M, Hassan M, Roohi M, Yousefi H. Maternal outcomes of intimate partner violence during pregnancy: study in Iran. *Public Health.* 2014;128:410-415. doi: 10.1016/j.puhe.2013.11.007.
27. Sigalla GN, Mushi D, Meyrowitsch DW, Manongi R, Rogathi JJ, Gammeltoft T, et al. Intimate partner violence during pregnancy and its association with preterm

- 1  
2  
3  
4  
5  
6 birth and low birth weight in Tanzania: A prospective cohort study. PLOS ONE.  
7  
8  
9 2017;12:e0172540. doi: 10.1371/journal.pone.0172540.  
10  
11  
12 28. Kawamoto T, Nitta H, Murata K, Toda E, Tsukamoto N, Hasegawa M, et al.  
13  
14 Rationale and study design of the Japan environment and children's study (JECS).  
15  
16 BMC Public Health. 2014;14:25. doi: 10.1186/1471-2458-14-25.  
17  
18  
19 29. Michikawa T, Nitta H, Nakayama SF, Yamazaki S, Isobe T, Tamura K, et al.  
20  
21  
22 Baseline profile of participants in the Japan environment and children's study  
23  
24 (JECS). J Epidemiol. 2018;28:99-104. doi: 10.2188/jea.JE20170018.  
25  
26  
27  
28  
29 30. Stirland LE, González-Saavedra L, Mullin DS, Ritchie CW, Muniz-Terrera G,  
30  
31  
32 Russ TC. Measuring multimorbidity beyond counting diseases: systematic review  
33  
34 of community and population studies and guide to index choice. BMJ.  
35  
36 2020;368:m160. doi: 10.1136/bmj.m160.  
37  
38  
39  
40  
41 31. McCauley M, Madaj B, White SA, Dickinson F, Bar-Zev S, Aminu M, et al.  
42  
43  
44 Burden of physical, psychological and social ill-health during and after pregnancy  
45  
46 among women in India, Pakistan, Kenya and Malawi. BMJ Glob Health.  
47  
48 2018;3:e000625. doi: 10.1136/bmjgh-2017-000625.  
49  
50  
51  
52  
53 32. Komori K, Komori M, Eitoku M, Joelle Muchanga SM, Ninomiya H, Kobayashi  
54  
55  
56 T, et al. Verbal abuse during pregnancy increases frequency of newborn hearing  
57  
58  
59  
60

- 1  
2  
3  
4  
5  
6  
7 screening referral: the Japan Environment and Children's Study. *Child Abuse*  
8  
9  
10 *Negl.* 2019;90:193-201. doi: 10.1016/j.chiabu.2019.01.025.
- 11  
12 33. Nishigori H, Obara T, Nishigori T, Metoki H, Ishikuro M, Mizuno S, et al. Drug  
13  
14  
15 use before and during pregnancy in Japan: the Japan environment and children's  
16  
17  
18 study. *Pharmacy (Basel)*. 2017;5. doi: 10.3390/pharmacy5020021.
- 19  
20  
21 34. Itabashi K, Fujimura M, Kusuda S. Introduction of the new standard for birth size  
22  
23  
24 by gestational ages. *J Jpn Pediatr Soc.* 2010:1271-1293 (in Japanese).
- 25  
26  
27 35. Endocrinology TJSfP. Excel-based clinical tools for growth evaluation of children.  
28  
29  
30 [http://jspe.umin.jp/medical/chart\\_dl.html](http://jspe.umin.jp/medical/chart_dl.html). Accessed 30 July 2021. (in Japanese).
- 31  
32  
33 36. Kowarik A, Templ M. Imputation with the R package VIM. *J Stat Soft.* 2016;74:1-  
34  
35  
36 16.
- 37  
38  
39 37. Santos S, Voerman E, Amiano P, Barros H, Beilin LJ, Bergström A, et al. Impact  
40  
41  
42 of maternal body mass index and gestational weight gain on pregnancy  
43  
44  
45 complications: an individual participant data meta-analysis of European, North  
46  
47  
48 American and Australian cohorts. *BJOG.* 2019;126:984-995. doi: 10.1111/1471-  
49  
50  
51 0528.15661.
- 52  
53  
54 38. Vats H, Saxena R, Sachdeva MP, Walia GK, Gupta V. Impact of maternal pre-  
55  
56  
57 pregnancy body mass index on maternal, fetal and neonatal adverse outcomes in  
58  
59  
60

- 1  
2  
3  
4  
5  
6 the worldwide populations: A systematic review and meta-analysis. *Obes Res*  
7  
8  
9  
10 Clin Pract. 2021;15:536-545. doi: 10.1016/j.orcp.2021.10.005.  
11
- 12 39. Shinar S, Agrawal S, Ryu M, Walmsley S, Serghides L, Yudin MH, et al. Perinatal  
13  
14 outcomes in women living with HIV-1 and receiving antiretroviral therapy—a  
15  
16 systematic review and meta-analysis. *Acta Obstet Gynecol Scand*. 2021. doi:  
17  
18 10.1111/aogs.14282.  
19  
20
- 21 40. Rogerson SJ, Desai M, Mayor A, Sicuri E, Taylor SM, van Eijk AM. Burden,  
22  
23 pathology, and costs of malaria in pregnancy: new developments for an old  
24  
25 problem. *Lancet Infect Dis*. 2018;18:e107-e118. doi: 10.1016/s1473-  
26  
27 3099(18)30066-5.  
28  
29
- 30 41. Schlueter A, Doshi U, Garg B, Hersh AR, Caughey AB. Adverse pregnancy  
31  
32 outcomes associated with maternal syphilis infection. *J Matern Fetal Neonatal*  
33  
34 *Med*. 2021:1-6. doi: 10.1080/14767058.2021.1895740.  
35  
36
- 37 42. Orazulike N, Sharma JB, Sharma S, Umeora OIJ. Tuberculosis (TB) in  
38  
39 pregnancy—a review. *Eur J Obstet Gynecol Reprod Biol*. 2021;259:167-177. doi:  
40  
41 10.1016/j.ejogrb.2021.02.016.  
42  
43
- 44 43. Bezerra HS, Alves RM, Nunes ADD, Barbosa IR. Prevalence and associated  
45  
46 factors of common mental disorders in women: A systematic review. *Public*  
47  
48  
49  
50  
51  
52  
53  
54  
55  
56  
57  
58  
59  
60

- 1  
2  
3  
4  
5  
6  
7 Health Rev. 2021;42:1604234. doi: 10.3389/phrs.2021.1604234.  
8  
9  
10 44. Niemi M, Falkenberg T, Petzold M, Chuc NT, Patel V. Symptoms of antenatal  
11  
12 common mental disorders, preterm birth and low birthweight: a prospective cohort  
13  
14 study in a semi-rural district of Vietnam. Trop Med Int Health. 2013;18:687-695.  
15  
16 doi: 10.1111/tmi.12101.  
17  
18  
19  
20  
21 45. Urquia ML, O'Campo PJ, Heaman MI, Janssen PA, Thiessen KR. Experiences of  
22  
23 violence before and during pregnancy and adverse pregnancy outcomes: an  
24  
25 analysis of the Canadian Maternity Experiences Survey. BMC Pregnancy  
26  
27 Childbirth. 2011;11:42. doi: 10.1186/1471-2393-11-42.  
28  
29  
30  
31  
32  
33  
34  
35  
36  
37  
38  
39  
40  
41  
42  
43  
44  
45  
46  
47  
48  
49  
50  
51  
52  
53  
54  
55  
56  
57  
58  
59  
60



1  
2  
3  
4  
5  
6 **Figure legends**  
7  
8

9 Figure 1. Flow diagram of the study participants.  
10  
11  
12  
13  
14  
15  
16  
17  
18  
19  
20  
21  
22  
23  
24  
25  
26  
27  
28  
29  
30  
31  
32  
33  
34  
35  
36  
37  
38  
39  
40  
41  
42  
43  
44  
45  
46  
47  
48  
49  
50  
51  
52  
53  
54  
55  
56  
57  
58  
59  
60

For peer review only

**Table 1. Maternal characteristics (n = 86,885)**

| Characteristics                         | The number of chronic conditions |                         |                     |                      |
|-----------------------------------------|----------------------------------|-------------------------|---------------------|----------------------|
|                                         | Total                            | 0 (n =<br>56,843)       | 1 (n =<br>26,805)   | ≥2 (n =<br>3,237)    |
| <b>Maternal age (years)</b>             |                                  |                         |                     |                      |
| ≤ 24                                    | 8,599<br>(9.9)                   | 5,020<br>(8.8)          | 3,086<br>(11.5)     | 493 (15.2)           |
| 25-29                                   | 23,873<br>(27.5)                 | 15,563<br>(27.4)        | 7,492 (28.0)        | 818 (25.3)           |
| 30-34                                   | 30,686<br>(35.3)                 | 20,369<br>(35.8)        | 9,281 (34.6)        | 1,036 (32.0)         |
| 35-39                                   | 19,703<br>(22.7)                 | 13,241<br>(23.3)        | 5,728 (21.4)        | 734 (22.7)           |
| ≥ 40                                    | 4,018<br>(4.6)                   | 2,648<br>(4.7)          | 1,215 (4.5)         | 155 (4.8)            |
| Missing                                 | 6<br>(0.01)                      | 2<br>(0.00)             | 3<br>(0.01)         | 1 (0.03)             |
| Body mass index<br>(kg/m <sup>2</sup> ) | 20.5<br>(13.2–<br>52.8)          | 20.7<br>(18.5–<br>24.9) | 19.5<br>(13.2-48.8) | 20.0 (13.3-<br>52.8) |
| <b>Parity</b>                           |                                  |                         |                     |                      |
| 0                                       | 35,973<br>(41.4)                 | 23,690<br>(41.7)        | 10,997<br>(41.0)    | 1,286 (39.7)         |

|    |                       |        |           |              |              |
|----|-----------------------|--------|-----------|--------------|--------------|
| 1  |                       |        |           |              |              |
| 2  |                       |        |           |              |              |
| 3  |                       |        |           |              |              |
| 4  |                       |        |           |              |              |
| 5  | 1                     | 31,810 | 20,848    | 9,825 (36.7) | 1,137 (35.1) |
| 6  |                       |        |           |              |              |
| 7  |                       | (36.6) | (36.7)    |              |              |
| 8  |                       |        |           |              |              |
| 9  |                       |        |           |              |              |
| 10 | ≥ 2                   | 17,040 | 10,914    | 5,368 (20.0) | 758 (23.4)   |
| 11 |                       |        |           |              |              |
| 12 |                       | (19.6) | (19.2)    |              |              |
| 13 |                       |        |           |              |              |
| 14 | Missing               | 2,062  | 1,391     | 615 (2.3)    | 56 (1.7)     |
| 15 |                       |        |           |              |              |
| 16 |                       | (2.4)  | (2.5)     |              |              |
| 17 |                       |        |           |              |              |
| 18 |                       |        |           |              |              |
| 19 | Smoking during        |        |           |              |              |
| 20 | pregnancy             |        |           |              |              |
| 21 |                       |        |           |              |              |
| 22 |                       |        |           |              |              |
| 23 | No                    | 49,414 | 33,392    | 14,613       | 1,409 (43.5) |
| 24 |                       |        |           |              |              |
| 25 |                       | (56.9) | (58.7)    | (54.5)       |              |
| 26 |                       |        |           |              |              |
| 27 | Quit before pregnancy | 20,152 | 13,268    | 6,124 (22.9) | 760 (23.5)   |
| 28 |                       |        |           |              |              |
| 29 |                       | (23.2) | (23.3)    |              |              |
| 30 |                       |        |           |              |              |
| 31 | Quit after pregnancy  | 12,042 | 7,230     | 4,139 (15.4) | 673 (20.8)   |
| 32 |                       |        |           |              |              |
| 33 |                       | (13.9) | (12.7)    |              |              |
| 34 |                       |        |           |              |              |
| 35 | Yes                   | 3,859  | 2,086     | 1,460 (5.5)  | 313 (9.7)    |
| 36 |                       |        |           |              |              |
| 37 |                       | (4.4)  | (3.7)     |              |              |
| 38 |                       |        |           |              |              |
| 39 | Missing               | 1,418  | 867 (1.5) | 469 (1.8)    | 82 (2.5)     |
| 40 |                       |        |           |              |              |
| 41 |                       | (1.6)  |           |              |              |
| 42 |                       |        |           |              |              |
| 43 |                       |        |           |              |              |
| 44 |                       |        |           |              |              |
| 45 |                       |        |           |              |              |
| 46 | Drinking during       |        |           |              |              |
| 47 | pregnancy             |        |           |              |              |
| 48 |                       |        |           |              |              |
| 49 |                       |        |           |              |              |
| 50 | No                    | 28,652 | 18,367    | 9,223 (34.4) | 1,062 (32.8) |
| 51 |                       |        |           |              |              |
| 52 |                       | (33.0) | (32.3)    |              |              |
| 53 |                       |        |           |              |              |
| 54 | Quit before pregnancy | 14,108 | 9,143     | 4,388 (16.4) | 577 (17.8)   |
| 55 |                       |        |           |              |              |
| 56 |                       |        |           |              |              |
| 57 |                       |        |           |              |              |
| 58 |                       |        |           |              |              |
| 59 |                       |        |           |              |              |
| 60 |                       |        |           |              |              |

|                                                          |        |           |              |              |
|----------------------------------------------------------|--------|-----------|--------------|--------------|
|                                                          | (16.2) | (16.1)    |              |              |
| Quit after pregnancy                                     | 40,354 | 26,921    | 12,021       | 1,412 (43.6) |
|                                                          | (46.5) | (47.4)    | (44.9)       |              |
| Yes                                                      | 2,370  | 1,546     | 704 (2.6)    | 120 (3.7)    |
|                                                          | (2.7)  | (2.7)     |              |              |
| Missing                                                  | 1,401  | 866 (1.5) | 469 (1.8)    | 66 (2.0)     |
|                                                          | (1.6)  |           |              |              |
| Maternal educational background                          |        |           |              |              |
| Junior high school                                       | 4,089  | 2,127     | 1,625 (6.1)  | 337 (10.4)   |
|                                                          | (4.7)  | (3.7)     |              |              |
| High school                                              | 27,106 | 16,881    | 8,968 (33.5) | 1,257 (38.8) |
|                                                          | (31.2) | (29.7)    |              |              |
| Technical junior college or technical/vocational college | 36,123 | 24,192    | 10,772       | 1,159 (35.8) |
|                                                          | (41.6) | (42.6)    | (40.2)       |              |
| University or above                                      | 18,415 | 12,922    | 5,073 (18.9) | 420 (13.0)   |
|                                                          | (21.2) | (22.7)    |              |              |
| Missing                                                  | 1,152  | 721 (1.3) | 367 (1.4)    | 64 (2.0)     |
|                                                          | (1.3)  |           |              |              |

---

Values are presented as n (%) or median (range)

**Table 2. Perinatal outcomes (n = 86,885)**

| Outcomes                                   | The number of chronic conditions |                   |                   |                   |
|--------------------------------------------|----------------------------------|-------------------|-------------------|-------------------|
|                                            | Total                            | 0 (n =            | 1 (n =            | ≥2 (n =           |
|                                            |                                  | 56,843)           | 26,805)           | 3,237)            |
| Gestational age at delivery (weeks)        | 39 (22–43)                       | 39 (23–42)        | 39 (22–42)        | 39 (23–43)        |
| Birth weight (grams)                       | 3,028 (312–5,214)                | 3,040 (312–4,906) | 3,010 (350–5,214) | 2,994 (398–4,554) |
| Neonatal sex                               |                                  |                   |                   |                   |
| Male                                       | 44,628 (51.4)                    | 29,101 (51.2)     | 13,847 (51.7)     | 1,680 (51.9)      |
| Female                                     | 42,252 (48.6)                    | 27,740 (48.8)     | 12,956 (48.3)     | 1,556 (48.1)      |
| Missing                                    | 5 (0.01)                         | 2 (0.00)          | 2 (0.01)          | 1 (0.03)          |
| Preterm birth (< 37 weeks' gestation)      | 3,963 (4.6)                      | 2,302 (4.1)       | 1,430 (5.3)       | 231 (7.1)         |
| Very preterm birth (< 34 weeks' gestation) | 834 (1.0)                        | 479 (0.8)         | 312 (1.2)         | 43 (1.3)          |
| Low birth weight (< 2,500 g)               | 7,013 (8.1)                      | 4,122 (7.3)       | 2,528 (9.4)       | 363 (11.2)        |
| Very low birth weight (< 1,500 g)          | 483 (0.6)                        | 269 (0.5)         | 190 (0.7)         | 24 (0.7)          |

|                                        |               |               |               |              |
|----------------------------------------|---------------|---------------|---------------|--------------|
| Extremely low birth weight (< 1,000 g) | 205 (0.2)     | 118 (0.2)     | 75 (0.3)      | 12 (0.4)     |
| Small for gestational age              |               |               |               |              |
| No                                     | 78,138 (89.9) | 51,407 (90.4) | 23,873 (89.1) | 2,858 (88.3) |
| Yes                                    | 6,474 (7.5)   | 3,909 (6.9)   | 2,251 (8.4)   | 314 (9.7)    |
| Missing                                | 2,273 (2.6)   | 1,527 (2.7)   | 681 (2.5)     | 65 (2.0)     |

Values are presented as n (%) or median (range).

**Table 3. Prevalence of 23 maternal chronic conditions (n = 86,885)**

| Condition                                   | n (%)         |
|---------------------------------------------|---------------|
| Abnormal pre-pregnancy BMI                  |               |
| Underweight (BMI < 18.5 kg/m <sup>2</sup> ) | 13,533 (15.6) |
| Obesity (BMI ≥ 25.0 kg/m <sup>2</sup> )     | 9,461 (10.9)  |
| Allergic disease                            | 2,680 (3.1)   |
| Anemia                                      | 628 (0.7)     |
| Diabetes mellitus                           | 128 (0.2)     |
| Domestic violence                           | 3,949 (4.6)   |
| Dyslipidemia                                | 6 (0.01)      |
| Epilepsy                                    | 133 (0.2)     |
| Gastric or duodenal ulcer                   | 298 (0.3)     |
| Heart disease                               | 7 (0.01)      |
| Hepatitis                                   | 5 (0.01)      |
| Human immunodeficiency virus infection      | 7 (0.01)      |
| Hypertension                                | 96 (0.1)      |
| Inflammatory bowel disease                  | 16 (0.02)     |
| Kidney disease                              | 17 (0.02)     |
| Malignancy                                  | 0 (0)         |
| Migraine                                    | 44 (0.1)      |
| Neurologic disease                          | 0 (0)         |
| Other sexually transmitted disease          | 1,193 (1.4)   |
| Psychiatric disorder                        | 604 (0.7)     |

|    |                               |           |
|----|-------------------------------|-----------|
| 1  |                               |           |
| 2  |                               |           |
| 3  |                               |           |
| 4  |                               |           |
| 5  | Rheumatic or collagen disease | 94 (0.1)  |
| 6  |                               |           |
| 7  | Substance abuse               | 1 (0.0)   |
| 8  |                               |           |
| 9  |                               |           |
| 10 | Thyroid disease               | 638 (0.7) |
| 11 |                               |           |
| 12 | <hr/>                         |           |

13 BMI, body mass index.

14

15

16

17

18

19

20

21

22

23

24

25

26

27

28

29

30

31

32

33

34

35

36

37

38

39

40

41

42

43

44

45

46

47

48

49

50

51

52

53

54

55

56

57

58

59

60

For peer review only



**Table 4. Crude and adjusted odds ratios of maternal chronic conditions for adverse perinatal outcomes (n = 86,885)**

| Outcome              | The number of chronic conditions |                         |                         |
|----------------------|----------------------------------|-------------------------|-------------------------|
|                      | 0                                | 1                       | $\geq 2$                |
| <b>PTB</b>           |                                  |                         |                         |
| N (%)                | 2,302 (4.1)                      | 1,430 (5.3)             | 231 (7.1)               |
| Crude OR (95% CI)    | reference                        | 1.34 (1.25-1.43)        | 1.82 (1.58-2.09)        |
| Adjusted OR (95% CI) | reference                        | <b>1.33 (1.24-1.42)</b> | <b>1.76 (1.53-2.03)</b> |
| <b>VPTB</b>          |                                  |                         |                         |
| N (%)                | 479 (0.8)                        | 312 (1.2)               | 43 (1.3)                |
| Crude OR (95% CI)    | reference                        | 1.39 (1.20-1.60)        | 1.58 (1.16-2.17)        |
| Adjusted OR (95% CI) | reference                        | <b>1.37 (1.19-1.58)</b> | <b>1.49 (1.09-2.05)</b> |
| <b>LBW</b>           |                                  |                         |                         |
| N (%)                | 4,122 (7.3)                      | 2,528 (9.4)             | 363 (11.2)              |
| Crude OR (95% CI)    | reference                        | 1.33 (1.26-1.40)        | 1.62 (1.44-1.81)        |
| Adjusted OR (95% CI) | reference                        | <b>1.33 (1.26-1.40)</b> | <b>1.58 (1.41-1.77)</b> |
| <b>VLBW</b>          |                                  |                         |                         |
| N (%)                | 269 (0.5)                        | 190 (0.7)               | 24 (0.7)                |
| Crude OR (95% CI)    | reference                        | 1.50 (1.25-1.81)        | 1.57 (1.03-2.39)        |
| Adjusted OR (95% CI) | reference                        | <b>1.51 (1.25-1.82)</b> | <b>1.53 (1.01-2.34)</b> |
| <b>ELBW</b>          |                                  |                         |                         |
| N (%)                | 118 (0.2)                        | 75 (0.3)                | 12 (0.4)                |
| Crude OR (95% CI)    | reference                        | 1.35 (1.01-1.80)        | 1.79 (0.99-3.24)        |

|                      |             |                         |                         |
|----------------------|-------------|-------------------------|-------------------------|
| Adjusted OR (95% CI) | reference   | <b>1.34 (1.00-1.80)</b> | 1.68 (0.92-3.05)        |
| <b>SGA†</b>          |             |                         |                         |
| N (%)                | 4,291 (7.6) | 2,324 (8.7)             | 319 (9.9)               |
| Crude OR (95% CI)    | reference   | 1.16 (1.10-1.23)        | 1.34 (1.19-1.51)        |
| Adjusted OR (95% CI) | reference   | <b>1.15 (1.09-1.21)</b> | <b>1.30 (1.15-1.47)</b> |

†The total number of participants was 86,674. Adjusted odds ratios with statistical significance are indicated in bold font.

CI, confidence interval; ELBW, extremely low birth weight (< 1,000 g); LBW, low birth weight (< 2,500 g); OR, odds ratio compared to that of infants of mothers without chronic conditions, adjusted for maternal age at delivery, parity (except for SGA analysis), maternal smoking status, maternal alcohol consumption, maternal educational background, and neonatal sex (except for SGA analysis); PTB, preterm birth before 37 weeks of gestation; SGA, small for gestational age; VLBW, very low birth weight (< 1,500 g); VPTB, preterm birth before 34 weeks of gestation.

All fetal records (n = 104,062)

Exclusion (n = 3,759)  
- Miscarriage (n = 1,254)  
- Stillbirth (n = 382)  
- Unknown birth outcome (n = 2,123)

n = 100,303

Exclusion (n = 5,550)  
- Second or later participation

n = 94,753

Exclusion (n = 7,868)  
- Multiple pregnancies (n = 1,809)  
- Pregnancies with chromosomal abnormality (n = 207)  
- Missing value of gestational age at delivery (n = 286)  
- Missing value of birth weight (n = 69)  
- Missing value of drug use information (n = 2,166)  
- Missing value of domestic violence from partner (n = 880)  
- Missing value of maternal infection (n = 2,418)  
- Missing value of maternal body mass index (n = 33)

Participants in the present study (n = 86,885)

Analyzed participants (n = 86,885)  
- Preterm birth <37 weeks' gestation  
- Preterm birth <34 weeks' gestation  
- Low birth weight  
- Very low birth weight  
- Extremely low birth weight

Exclusion (n = 211)  
- Gestational age <22 and ≥42 weeks (n = 214)

Analyzed participants (n = 86,674)  
- Small for gestational age infant

**Supplementary Table 1. Crude and adjusted odds ratios of maternal chronic conditions for adverse perinatal outcomes in the complete dataset (n = 82,393)**

| Outcome              | The number of chronic conditions |                         |                         |
|----------------------|----------------------------------|-------------------------|-------------------------|
|                      | 0                                | 1                       | ≥2                      |
| <b>PTB</b>           |                                  |                         |                         |
| N (%)                | 2,110 (3.9)                      | 1,309 (5.2)             | 208 (6.8)               |
| Crude OR (95% CI)    | reference                        | 1.34 (1.25-1.43)        | 1.80 (1.55-2.08)        |
| Adjusted OR (95% CI) | reference                        | <b>1.33 (1.24-1.43)</b> | <b>1.74 (1.50-2.02)</b> |
| <b>VPTB</b>          |                                  |                         |                         |
| N (%)                | 404 (0.8)                        | 271 (1.1)               | 34 (1.1)                |
| Crude OR (95% CI)    | reference                        | 1.43 (1.23-1.67)        | 1.49 (1.05-2.13)        |
| Adjusted OR (95% CI) | reference                        | <b>1.41 (1.21-1.65)</b> | 1.41 (0.99-2.01)        |
| <b>LBW</b>           |                                  |                         |                         |
| N (%)                | 3,833 (7.1)                      | 2,344 (9.2)             | 329 (10.8)              |
| Crude OR (95% CI)    | reference                        | 1.33 (1.26-1.40)        | 1.58 (1.40-1.78)        |
| Adjusted OR (95% CI) | reference                        | <b>1.33 (1.26-1.40)</b> | <b>1.54 (1.37-1.74)</b> |
| <b>VLBW</b>          |                                  |                         |                         |
| N (%)                | 217 (0.4)                        | 155 (0.6)               | 17 (0.6)                |
| Crude OR (95% CI)    | reference                        | 1.52 (1.24-1.87)        | 1.39 (0.85-2.28)        |
| Adjusted OR (95% CI) | reference                        | <b>1.52 (1.23-1.87)</b> | 1.34 (0.82-2.21)        |
| <b>ELBW</b>          |                                  |                         |                         |
| N (%)                | 82 (0.2)                         | 50 (0.2)                | 9 (0.3)                 |
| Crude OR (95% CI)    | reference                        | 1.30 (0.91-1.84)        | 1.95 (0.98-3.88)        |
| Adjusted OR (95% CI) | reference                        | 1.29 (0.90-1.83)        | 1.80 (0.90-3.61)        |
| <b>SGA†</b>          |                                  |                         |                         |

|                      |             |                         |                         |
|----------------------|-------------|-------------------------|-------------------------|
| N (%)                | 3,784 (7.0) | 2,171 (8.6)             | 299 (9.8)               |
| Crude OR (95% CI)    | reference   | 1.24 (1.17-1.31)        | 1.44 (1.27-1.63)        |
| Adjusted OR (95% CI) | reference   | <b>1.23 (1.16-1.29)</b> | <b>1.38 (1.22-1.57)</b> |

†The total number of participants was 82,191. Adjusted odds ratios with statistical significance are indicated in bold font.

CI, confidence interval; ELBW, extremely low birth weight (< 1,000 g); LBW, low birth weight (< 2,500 g); OR, odds ratio compared to that of infants of mothers without chronic conditions, adjusted for maternal age at delivery, parity (except for SGA analysis), maternal smoking status, maternal alcohol consumption, maternal educational background, and neonatal sex (except for SGA analysis); PTB, preterm birth before 37 weeks of gestation; SGA, small-for-gestational age; VLBW, very low birth weight (< 1,500 g); VPTB, preterm birth before 34 weeks of gestation.

**Supplementary Table 2A. Adjusted odds ratios of multimorbidity with underweight for adverse perinatal outcomes (n = 86,885)**

| Outcome              | The number of chronic conditions |                              |                              |                              |
|----------------------|----------------------------------|------------------------------|------------------------------|------------------------------|
|                      | 0                                | 1                            | ≥2 without<br>underweight    | ≥2 with<br>underweight       |
| <b>PTB</b>           |                                  |                              |                              |                              |
| N (%)                | 2,302<br>(4.1)                   | 1,430 (5.3)                  | 146 (8.3)                    | 85 (5.7)                     |
| Adjusted OR (95% CI) | reference                        | <b>1.33 (1.24-<br/>1.42)</b> | <b>2.01 (1.69-<br/>2.40)</b> | <b>1.45 (1.16-<br/>1.81)</b> |
| <b>VPTB</b>          |                                  |                              |                              |                              |
| N (%)                | 479 (0.8)                        | 312 (1.2)                    | 30 (1.7)                     | 13 (0.9)                     |
| Adjusted OR (95% CI) | reference                        | <b>1.37 (1.19-<br/>1.58)</b> | <b>1.85 (1.27-<br/>2.68)</b> | 1.04 (0.60-<br>1.81)         |
| <b>LBW</b>           |                                  |                              |                              |                              |
| N (%)                | 4,122<br>(7.3)                   | 2,528 (9.4)                  | 181 (10.3)                   | 182 (12.3)                   |
| Adjusted OR (95% CI) | reference                        | <b>1.33 (1.26-<br/>1.40)</b> | <b>1.41 (1.20-<br/>1.65)</b> | <b>1.79 (1.52-<br/>2.10)</b> |
| <b>VLBW</b>          |                                  |                              |                              |                              |
| N (%)                | 269 (0.5)                        | 190 (0.7)                    | 17 (1.0)                     | 7 (0.5)                      |
| Adjusted OR (95% CI) | reference                        | <b>1.51 (1.25-<br/>1.82)</b> | <b>1.93 (1.18-<br/>3.17)</b> | 1.03 (0.48-<br>2.18)         |
| <b>ELBW</b>          |                                  |                              |                              |                              |
| N (%)                | 118 (0.2)                        | 75 (0.3)                     | 8 (0.5)                      | 4 (0.3)                      |

|                      |             |                         |                  |                         |
|----------------------|-------------|-------------------------|------------------|-------------------------|
| Adjusted OR (95% CI) | reference   | <b>1.34 (1.00-1.80)</b> | 1.95 (0.94-4.01) | 1.31 (0.48-3.57)        |
| <b>SGA†</b>          |             |                         |                  |                         |
| N (%)                | 4,291 (7.6) | 2,324 (8.7)             | 128 (7.3)        | 191 (12.9)              |
| Adjusted OR (95% CI) | reference   | <b>1.15 (1.09-1.21)</b> | 0.93 (0.77-1.12) | <b>1.78 (1.52-2.08)</b> |

†The total number of participants was 86,674. Adjusted odds ratios with statistical significance are indicated in bold font.

CI, confidence interval; ELBW, extremely low birth weight (< 1,000 g); LBW, low birth weight (< 2,500 g); OR, odds ratio compared to that of infants of mothers without chronic conditions, adjusted for maternal age at delivery, parity (except for SGA analysis), maternal smoking status, maternal alcohol consumption, maternal educational background, and neonatal sex (except for SGA analysis); PTB, preterm birth before 37 weeks of gestation; SGA, small-for-gestational age; VLBW, very low birth weight (< 1,500 g); VPTB, preterm birth before 34 weeks of gestation.

**Supplementary Table 2B. Adjusted odds ratios of multimorbidity with obesity for adverse perinatal outcomes (n = 86,885)**

| Outcome              | The number of chronic conditions |                         |                         |                         |
|----------------------|----------------------------------|-------------------------|-------------------------|-------------------------|
|                      | 0                                | 1                       | ≥2 without obesity      | ≥2 with obesity         |
| <b>PTB</b>           |                                  |                         |                         |                         |
| N (%)                | 2,302<br>(4.1)                   | 1,430 (5.3)             | 123 (6.4)               | 108 (8.2)               |
| Adjusted OR (95% CI) | reference                        | <b>1.33 (1.24-1.42)</b> | <b>1.60 (1.33-1.93)</b> | <b>1.98 (1.62-2.43)</b> |
| <b>VPTB</b>          |                                  |                         |                         |                         |
| N (%)                | 479 (0.8)                        | 312 (1.2)               | 17 (0.9)                | 26 (2.0)                |
| Adjusted OR (95% CI) | reference                        | <b>1.37 (1.19-1.58)</b> | 1.02 (0.63-1.67)        | <b>2.13 (1.43-3.18)</b> |
| <b>LBW</b>           |                                  |                         |                         |                         |
| N (%)                | 4,122<br>(7.3)                   | 2,528 (9.4)             | 231 (12.0)              | 132 (10.1)              |
| Adjusted OR (95% CI) | reference                        | <b>1.33 (1.26-1.40)</b> | <b>1.72 (1.49-1.99)</b> | <b>1.37 (1.14-1.65)</b> |
| <b>VLBW</b>          |                                  |                         |                         |                         |
| N (%)                | 269 (0.5)                        | 190 (0.7)               | 10 (0.5)                | 14 (1.1)                |
| Adjusted OR (95% CI) | reference                        | <b>1.51 (1.25-1.82)</b> | 1.11 (0.59-2.10)        | <b>2.11 (1.23-3.63)</b> |
| <b>ELBW</b>          |                                  |                         |                         |                         |
| N (%)                | 118 (0.2)                        | 75 (0.3)                | 5 (0.3)                 | 7 (0.5)                 |



|                      |             |                         |                         |                         |
|----------------------|-------------|-------------------------|-------------------------|-------------------------|
| Adjusted OR (95% CI) | reference   | <b>1.34 (1.00-1.80)</b> | 1.23 (0.50-3.01)        | <b>2.27 (1.05-4.91)</b> |
| <b>SGA†</b>          |             |                         |                         |                         |
| N (%)                | 4,291 (7.6) | 2,324 (8.7)             | 227 (11.8)              | 92 (7.0)                |
| Adjusted OR (95% CI) | reference   | <b>1.15 (1.09-1.21)</b> | <b>1.60 (1.38-1.84)</b> | 0.89 (0.72-1.11)        |

†The total number of participants was 86,674. Adjusted odds ratios with statistical significance are indicated in bold font.

CI, confidence interval; ELBW, extremely low birth weight (< 1,000 g); LBW, low birth weight (< 2,500 g); OR, odds ratio compared to that of infants of mothers without chronic conditions, adjusted for maternal age at delivery, parity (except for SGA analysis), maternal smoking status, maternal alcohol consumption, maternal educational background, and neonatal sex (except for SGA analysis); PTB, preterm birth before 37 weeks of gestation; SGA, small-for-gestational age; VLBW, very low birth weight (< 1,500 g); VPTB, preterm birth before 34 weeks of gestation.

**Supplementary Table 2C. Adjusted odds ratios of multimorbidity with psychiatric disorder for adverse perinatal outcomes (n = 86,885)**

| Outcome              | The number of chronic conditions |                         |                                 |                              |
|----------------------|----------------------------------|-------------------------|---------------------------------|------------------------------|
|                      | 0                                | 1                       | ≥2 without psychiatric disorder | ≥2 with psychiatric disorder |
| <b>PTB</b>           |                                  |                         |                                 |                              |
| N (%)                | 2,302<br>(4.1)                   | 1,430 (5.3)             | 201 (6.9)                       | 30 (9.4)                     |
| Adjusted OR (95% CI) | reference                        | <b>1.33 (1.24-1.42)</b> | <b>1.71 (1.47-1.98)</b>         | <b>2.22 (1.52-3.25)</b>      |
| <b>VPTB</b>          |                                  |                         |                                 |                              |
| N (%)                | 479 (0.8)                        | 312 (1.2)               | 40 (1.4)                        | 3 (0.9)                      |
| Adjusted OR (95% CI) | reference                        | <b>1.37 (1.19-1.58)</b> | <b>1.56 (1.12-2.12)</b>         | 0.96 (0.30-3.00)             |
| <b>LBW</b>           |                                  |                         |                                 |                              |
| N (%)                | 4,122<br>(7.3)                   | 2,528 (9.4)             | 325 (11.1)                      | 38 (11.9)                    |
| Adjusted OR (95% CI) | reference                        | <b>1.33 (1.26-1.40)</b> | <b>1.58 (1.40-1.78)</b>         | <b>1.55 (1.10-2.18)</b>      |
| <b>VLBW</b>          |                                  |                         |                                 |                              |
| N (%)                | 269 (0.5)                        | 190 (0.7)               | 21 (0.7)                        | 3 (0.9)                      |
| Adjusted OR (95% CI) | reference                        | <b>1.51 (1.25-1.82)</b> | 1.50 (0.96-2.35)                | 1.78 (0.57-5.61)             |
| <b>ELBW</b>          |                                  |                         |                                 |                              |

|                      |             |                         |                         |                  |
|----------------------|-------------|-------------------------|-------------------------|------------------|
| N (%)                | 118 (0.2)   | 75 (0.3)                | 11 (0.4)                | 1 (0.3)          |
| Adjusted OR (95% CI) | reference   | <b>1.34 (1.00-1.80)</b> | 1.73 (0.93-3.23)        | 1.24 (0.17-8.97) |
| <b>SGA†</b>          |             |                         |                         |                  |
| N (%)                | 4,291 (7.6) | 2,324 (8.7)             | 292 (10.0)              | 27 (8.5)         |
| Adjusted OR (95% CI) | reference   | <b>1.15 (1.09-1.21)</b> | <b>1.33 (1.17-1.51)</b> | 1.06 (0.71-1.58) |

†The total number of participants was 86,674. Adjusted odds ratios with statistical significance are indicated in bold font.

CI, confidence interval; ELBW, extremely low birth weight (< 1,000 g); LBW, low birth weight (< 2,500 g); OR, odds ratio compared to that of infants of mothers without chronic conditions, adjusted for maternal age at delivery, parity (except for SGA analysis), maternal smoking status, maternal alcohol consumption, maternal educational background, and neonatal sex (except for SGA analysis); PTB, preterm birth before 37 weeks of gestation; SGA, small-for-gestational age; VLBW, very low birth weight (< 1,500 g); VPTB, preterm birth before 34 weeks of gestation.

**Supplementary Table 2D. Adjusted odds ratios of multimorbidity with domestic violence from intimate partner for adverse perinatal outcomes (n = 86,885)**

| Outcome              | The number of chronic conditions |                         |                              |                           |
|----------------------|----------------------------------|-------------------------|------------------------------|---------------------------|
|                      | 0                                | 1                       | ≥2 without domestic violence | ≥2 with domestic violence |
| <b>PTB</b>           |                                  |                         |                              |                           |
| N (%)                | 2,302<br>(4.1)                   | 1,430 (5.3)             | 141 (7.6)                    | 90 (6.5)                  |
| Adjusted OR (95% CI) | reference                        | <b>1.33 (1.24-1.42)</b> | <b>1.88 (1.58-2.25)</b>      | <b>1.59 (1.28-1.98)</b>   |
| <b>VPTB</b>          |                                  |                         |                              |                           |
| N (%)                | 479 (0.8)                        | 312 (1.2)               | 30 (1.6)                     | 13 (0.9)                  |
| Adjusted OR (95% CI) | reference                        | <b>1.37 (1.19-1.58)</b> | <b>1.81 (1.25-2.63)</b>      | 1.05 (0.60-1.84)          |
| <b>LBW</b>           |                                  |                         |                              |                           |
| N (%)                | 4,122<br>(7.3)                   | 2,528 (9.4)             | 219 (11.8)                   | 144 (10.4)                |
| Adjusted OR (95% CI) | reference                        | <b>1.33 (1.26-1.40)</b> | <b>1.66 (1.44-1.92)</b>      | <b>1.46 (1.23-1.75)</b>   |
| <b>VLBW</b>          |                                  |                         |                              |                           |
| N (%)                | 269 (0.5)                        | 190 (0.7)               | 16 (0.9)                     | 8 (0.6)                   |
| Adjusted OR (95% CI) | reference                        | <b>1.51 (1.25-1.82)</b> | <b>1.74 (1.04-2.88)</b>      | 1.24 (0.61-2.52)          |
| <b>ELBW</b>          |                                  |                         |                              |                           |

|                      |             |                         |                         |                         |
|----------------------|-------------|-------------------------|-------------------------|-------------------------|
| N (%)                | 118 (0.2)   | 75 (0.3)                | 8 (0.4)                 | 4 (0.3)                 |
| Adjusted OR (95% CI) | reference   | <b>1.34 (1.00-1.80)</b> | 1.96 (0.95-4.02)        | 1.30 (0.48-3.55)        |
| <b>SGA†</b>          |             |                         |                         |                         |
| N (%)                | 4,291 (7.6) | 2,324 (8.7)             | 188 (10.2)              | 131 (9.5)               |
| Adjusted OR (95% CI) | reference   | <b>1.15 (1.09-1.21)</b> | <b>1.36 (1.17-1.59)</b> | <b>1.22 (1.02-1.47)</b> |

†The total number of participants was 86,674. Adjusted odds ratios with statistical significance are indicated in bold font.

CI, confidence interval; ELBW, extremely low birth weight (< 1,000 g); LBW, low birth weight (< 2,500 g); OR, odds ratio compared to that of infants of mothers without chronic conditions, adjusted for maternal age at delivery, parity (except for SGA analysis), maternal smoking status, maternal alcohol consumption, maternal educational background, and neonatal sex (except for SGA analysis); PTB, preterm birth before 37 weeks of gestation; SGA, small-for-gestational age; VLBW, very low birth weight (< 1,500 g); VPTB, preterm birth before 34 weeks of gestation.

STROBE Statement—Checklist of items that should be included in reports of *cohort studies*

|                           | Item No | Recommendation                                                                                                                                                                                                                                                                                                         | Page No |
|---------------------------|---------|------------------------------------------------------------------------------------------------------------------------------------------------------------------------------------------------------------------------------------------------------------------------------------------------------------------------|---------|
| <b>Title and abstract</b> | 1       | (a) Indicate the study's design with a commonly used term in the title or the abstract<br>(b) Provide in the abstract an informative and balanced summary of what was done and what was found                                                                                                                          | 1-4     |
| <b>Introduction</b>       |         |                                                                                                                                                                                                                                                                                                                        |         |
| Background/rationale      | 2       | Explain the scientific background and rationale for the investigation being reported                                                                                                                                                                                                                                   | 6-8     |
| Objectives                | 3       | State specific objectives, including any prespecified hypotheses                                                                                                                                                                                                                                                       | 8       |
| <b>Methods</b>            |         |                                                                                                                                                                                                                                                                                                                        |         |
| Study design              | 4       | Present key elements of study design early in the paper                                                                                                                                                                                                                                                                | 9       |
| Setting                   | 5       | Describe the setting, locations, and relevant dates, including periods of recruitment, exposure, follow-up, and data collection                                                                                                                                                                                        | 9-10    |
| Participants              | 6       | (a) Give the eligibility criteria, and the sources and methods of selection of participants. Describe methods of follow-up<br>(b) For matched studies, give matching criteria and number of exposed and unexposed                                                                                                      | 9-10    |
| Variables                 | 7       | Clearly define all outcomes, exposures, predictors, potential confounders, and effect modifiers. Give diagnostic criteria, if applicable                                                                                                                                                                               | 10-14   |
| Data sources/measurement  | 8*      | For each variable of interest, give sources of data and details of methods of assessment (measurement). Describe comparability of assessment methods if there is more than one group                                                                                                                                   | 10-14   |
| Bias                      | 9       | Describe any efforts to address potential sources of bias                                                                                                                                                                                                                                                              | 15      |
| Study size                | 10      | Explain how the study size was arrived at                                                                                                                                                                                                                                                                              | 9       |
| Quantitative variables    | 11      | Explain how quantitative variables were handled in the analyses. If applicable, describe which groupings were chosen and why                                                                                                                                                                                           | 12-14   |
| Statistical methods       | 12      | (a) Describe all statistical methods, including those used to control for confounding<br>(b) Describe any methods used to examine subgroups and interactions<br>(c) Explain how missing data were addressed<br>(d) If applicable, explain how loss to follow-up was addressed<br>(e) Describe any sensitivity analyses | 15-16   |
| <b>Results</b>            |         |                                                                                                                                                                                                                                                                                                                        |         |
| Participants              | 13*     | (a) Report numbers of individuals at each stage of study—eg numbers potentially eligible, examined for eligibility, confirmed eligible, included in the study, completing follow-up, and analysed<br>(b) Give reasons for non-participation at each stage<br>(c) Consider use of a flow diagram                        | 17      |
| Descriptive data          | 14*     | (a) Give characteristics of study participants (eg demographic, clinical, social) and information on exposures and potential confounders<br>(b) Indicate number of participants with missing data for each variable of interest<br>(c) Summarise follow-up time (eg, average and total amount)                         | 17      |
| Outcome data              | 15*     | Report numbers of outcome events or summary measures over time                                                                                                                                                                                                                                                         | 17-18   |

|    |                          |    |                                                                                                                                                                                                              |       |
|----|--------------------------|----|--------------------------------------------------------------------------------------------------------------------------------------------------------------------------------------------------------------|-------|
| 1  | Main results             | 16 | (a) Give unadjusted estimates and, if applicable, confounder-adjusted estimates and their precision (eg, 95% confidence interval). Make clear which confounders were adjusted for and why they were included | 17-18 |
| 2  |                          |    | (b) Report category boundaries when continuous variables were categorized                                                                                                                                    |       |
| 3  |                          |    | (c) If relevant, consider translating estimates of relative risk into absolute risk for a meaningful time period                                                                                             |       |
| 4  |                          |    |                                                                                                                                                                                                              |       |
| 5  |                          |    |                                                                                                                                                                                                              |       |
| 6  |                          |    |                                                                                                                                                                                                              |       |
| 7  |                          |    |                                                                                                                                                                                                              |       |
| 8  |                          |    |                                                                                                                                                                                                              |       |
| 9  | Other analyses           | 17 | Report other analyses done—eg analyses of subgroups and interactions, and sensitivity analyses                                                                                                               | 18    |
| 10 |                          |    |                                                                                                                                                                                                              |       |
| 11 | <b>Discussion</b>        |    |                                                                                                                                                                                                              |       |
| 12 |                          |    |                                                                                                                                                                                                              |       |
| 13 | Key results              | 18 | Summarise key results with reference to study objectives                                                                                                                                                     | 19    |
| 14 | Limitations              | 19 | Discuss limitations of the study, taking into account sources of potential bias or imprecision. Discuss both direction and magnitude of any potential bias                                                   | 19-20 |
| 15 |                          |    |                                                                                                                                                                                                              |       |
| 16 | Interpretation           | 20 | Give a cautious overall interpretation of results considering objectives, limitations, multiplicity of analyses, results from similar studies, and other relevant evidence                                   | 20-24 |
| 17 |                          |    |                                                                                                                                                                                                              |       |
| 18 |                          |    |                                                                                                                                                                                                              |       |
| 19 | Generalisability         | 21 | Discuss the generalisability (external validity) of the study results                                                                                                                                        | 24    |
| 20 |                          |    |                                                                                                                                                                                                              |       |
| 21 | <b>Other information</b> |    |                                                                                                                                                                                                              |       |
| 22 | Funding                  | 22 | Give the source of funding and the role of the funders for the present study and, if applicable, for the original study on which the present article is based                                                | 26    |
| 23 |                          |    |                                                                                                                                                                                                              |       |
| 24 |                          |    |                                                                                                                                                                                                              |       |

\*Give information separately for exposed and unexposed groups.

**Note:** An Explanation and Elaboration article discusses each checklist item and gives methodological background and published examples of transparent reporting. The STROBE checklist is best used in conjunction with this article (freely available on the Web sites of PLoS Medicine at <http://www.plosmedicine.org/>, Annals of Internal Medicine at <http://www.annals.org/>, and Epidemiology at <http://www.epidem.com/>). Information on the STROBE Initiative is available at <http://www.strobe-statement.org>.

# BMJ Open

## Association between maternal multimorbidity and preterm birth, low birth weight, and small for gestational age: a prospective birth cohort study from the Japan Environment Children's Study

|                                 |                                                                                                                                                                                                                                                                                                                                                                                                                                                                                                                                                                                                                                                                                                                                                                                                                                                                                                                                                                                                                                                                                                                          |
|---------------------------------|--------------------------------------------------------------------------------------------------------------------------------------------------------------------------------------------------------------------------------------------------------------------------------------------------------------------------------------------------------------------------------------------------------------------------------------------------------------------------------------------------------------------------------------------------------------------------------------------------------------------------------------------------------------------------------------------------------------------------------------------------------------------------------------------------------------------------------------------------------------------------------------------------------------------------------------------------------------------------------------------------------------------------------------------------------------------------------------------------------------------------|
| Journal:                        | <i>BMJ Open</i>                                                                                                                                                                                                                                                                                                                                                                                                                                                                                                                                                                                                                                                                                                                                                                                                                                                                                                                                                                                                                                                                                                          |
| Manuscript ID                   | bmjopen-2022-069281.R1                                                                                                                                                                                                                                                                                                                                                                                                                                                                                                                                                                                                                                                                                                                                                                                                                                                                                                                                                                                                                                                                                                   |
| Article Type:                   | Original research                                                                                                                                                                                                                                                                                                                                                                                                                                                                                                                                                                                                                                                                                                                                                                                                                                                                                                                                                                                                                                                                                                        |
| Date Submitted by the Author:   | 13-Feb-2023                                                                                                                                                                                                                                                                                                                                                                                                                                                                                                                                                                                                                                                                                                                                                                                                                                                                                                                                                                                                                                                                                                              |
| Complete List of Authors:       | Nakanishi, Kentaro; Asahikawa Medical University, Saijo, Yasuaki; Asahikawa Medical University, Department of Social Medicine<br>Yoshioka, Eiji ; Asahikawa Medical University, Department of Social Medicine<br>Sato, Yukihiro; Asahikawa Medical University, Department of Social Medicine<br>Kato, Yasuhito; Asahikawa Medical University, Department of Obstetrics and Gynecology; Asahikawa Medical University, Department of Social Medicine<br>Nagaya, Ken; Asahikawa Medical University Hospital<br>Takahashi, Satoru; Asahikawa Medical University, Department of Pediatrics<br>Ito, Yoshiya; Japanese Red Cross Hokkaido College of Nursing<br>Kobayashi, Sumitaka; Hokkaido University, Center for Environmental and Health Sciences<br>Miyashita, Chihiro; Hokkaido Daigaku, Center for Environmental and Health Sciences<br>Araki, Atsuko; Hokkaido Daigaku, Center for Environmental and Health Sciences; Hokkaido Daigaku, Graduate school of Health Sciences<br>Kishi, Reiko; Hokkaido Daigaku group, The Japan Environment ; National Institute for Environmental Studies, Tsukuba city, Ibaraki, Japan |
| <b>Primary Subject Heading</b>: | Epidemiology                                                                                                                                                                                                                                                                                                                                                                                                                                                                                                                                                                                                                                                                                                                                                                                                                                                                                                                                                                                                                                                                                                             |
| Secondary Subject Heading:      | Obstetrics and gynaecology                                                                                                                                                                                                                                                                                                                                                                                                                                                                                                                                                                                                                                                                                                                                                                                                                                                                                                                                                                                                                                                                                               |
| Keywords:                       | EPIDEMIOLOGY, OBSTETRICS, Fetal medicine < OBSTETRICS, Maternal medicine < OBSTETRICS                                                                                                                                                                                                                                                                                                                                                                                                                                                                                                                                                                                                                                                                                                                                                                                                                                                                                                                                                                                                                                    |
|                                 |                                                                                                                                                                                                                                                                                                                                                                                                                                                                                                                                                                                                                                                                                                                                                                                                                                                                                                                                                                                                                                                                                                                          |

SCHOLARONE™  
Manuscripts



1  
2  
3  
4  
5  
6  
7  
8  
9  
10  
11  
12  
13  
14  
15  
16  
17  
18  
19  
20  
21  
22  
23  
24  
25  
26  
27  
28  
29  
30  
31  
32  
33  
34  
35  
36  
37  
38  
39  
40  
41  
42  
43  
44  
45  
46  
47  
48  
49  
50  
51  
52  
53  
54  
55  
56  
57  
58  
59  
60



I, the Submitting Author has the right to grant and does grant on behalf of all authors of the Work (as defined in the below author licence), an exclusive licence and/or a non-exclusive licence for contributions from authors who are: i) UK Crown employees; ii) where BMJ has agreed a CC-BY licence shall apply, and/or iii) in accordance with the terms applicable for US Federal Government officers or employees acting as part of their official duties; on a worldwide, perpetual, irrevocable, royalty-free basis to BMJ Publishing Group Ltd ("BMJ") its licensees and where the relevant Journal is co-owned by BMJ to the co-owners of the Journal, to publish the Work in this journal and any other BMJ products and to exploit all rights, as set out in our [licence](#).

The Submitting Author accepts and understands that any supply made under these terms is made by BMJ to the Submitting Author unless you are acting as an employee on behalf of your employer or a postgraduate student of an affiliated institution which is paying any applicable article publishing charge ("APC") for Open Access articles. Where the Submitting Author wishes to make the Work available on an Open Access basis (and intends to pay the relevant APC), the terms of reuse of such Open Access shall be governed by a Creative Commons licence – details of these licences and which [Creative Commons](#) licence will apply to this Work are set out in our licence referred to above.

Other than as permitted in any relevant BMJ Author's Self Archiving Policies, I confirm this Work has not been accepted for publication elsewhere, is not being considered for publication elsewhere and does not duplicate material already published. I confirm all authors consent to publication of this Work and authorise the granting of this licence.

1  
2  
3  
4  
5  
6  
7 **Title: Association between maternal multimorbidity and preterm birth, low birth**  
8  
9 **weight, and small for gestational age: a prospective birth cohort study from the**  
10  
11 **Japan Environment Children's Study**  
12  
13  
14  
15  
16  
17

18 **Author names**

19  
20  
21 Kentaro Nakanishi<sup>a</sup>, Yasuaki Saijo<sup>b</sup>, Eiji Yoshioka<sup>b</sup>, Yukihiro Sato<sup>b</sup>, Yasuhito Kato<sup>a,b</sup>,  
22  
23  
24 Ken Nagaya<sup>c</sup>, Satoru Takahashi<sup>d</sup>, Yoshiya Ito<sup>e</sup>, Sumitaka Kobayashi<sup>f</sup>, Chihiro  
25  
26  
27 Miyashita<sup>f</sup>, Atsuko Ikeda-Araki<sup>f,g</sup>, Reiko Kishi<sup>f</sup>, the Japan Environment and Children's  
28  
29  
30 Study (JECS) Group<sup>h</sup>  
31  
32  
33  
34  
35

36 **Author affiliations**

37  
38  
39 <sup>a</sup>Department of Obstetrics and Gynecology, Asahikawa Medical University, Asahikawa,  
40  
41  
42 1-1-1, Midorigaoka higashi2-jo, Asahikawa, Hokkaido 078-8510, Japan  
43  
44

45 <sup>b</sup>Division of Public Health and Epidemiology, Department of Social Medicine,  
46  
47  
48 Asahikawa Medical University, 1-1-1, Midorigaoka higashi2-jo, Asahikawa, Hokkaido  
49  
50  
51 078-8510, Japan  
52  
53

54 <sup>c</sup>Division of Neonatology, Perinatal Medical Center, Asahikawa Medical University  
55  
56  
57 Hospital, 1-1-1, Midorigaoka higashi2-jo, Asahikawa, Hokkaido 078-8510, Japan  
58  
59  
60

<sup>d</sup>Department of Pediatrics, Asahikawa Medical University, 1-1-1, Midorigaoka  
higashi2-jo, Asahikawa, Hokkaido 078-8510, Japan

<sup>e</sup>Faculty of Nursing, Japanese Red Cross Hokkaido College of Nursing, 664-1,  
Akebono-cho, Kitami, Hokkaido 090-0011, Japan

<sup>f</sup>Center for Environmental and Health Sciences, Hokkaido University, Kita12-jo,  
Nishi7-chome, Kita-ku, Sapporo, Hokkaido 060-0812, Japan

<sup>g</sup>Faculty of Health Sciences, Hokkaido University, Kita12-jo, Nishi5-chome, Kita-ku,  
Sapporo, Hokkaido 060-0812, Japan

<sup>h</sup>Members of the Japan Environment and Children's Study Group are listed in the  
Appendices.

### **Corresponding author**

Yasuaki Saijo

Division of Public Health and Epidemiology, Department of Social Medicine,

Asahikawa Medical University

078-8510, 1-1-1, Midorigaoka higashi2-jo, Asahikawa, Hokkaido, Japan

Tel: +81-166-68-2402

Email: y-saijo@asahikawa-med.ac.jp

1  
2  
3  
4  
5  
6  
7  
8  
9  
10  
11  
12  
13  
14  
15  
16  
17  
18  
19  
20  
21  
22  
23  
24  
25  
26  
27  
28  
29  
30  
31  
32  
33  
34  
35  
36  
37  
38  
39  
40  
41  
42  
43  
44  
45  
46  
47  
48  
49  
50  
51  
52  
53  
54  
55  
56  
57  
58  
59  
60

## 1 ABSTRACT

2 **Objectives:** Multimorbidity is defined as the coexistence of two or more chronic physical  
3 or psychological conditions within an individual. The association between maternal  
4 multimorbidity and adverse perinatal outcomes such as preterm delivery and low birth  
5 weight has not been well studied. Therefore, this study aimed to investigate this  
6 association.

7 **Methods:** We conducted a prospective cohort study using data from the Japan  
8 Environment and Children's Study of pregnant women between 2011 and 2014. Those  
9 with data on chronic maternal conditions were included in the study and categorized as  
10 having no chronic condition, one chronic condition, or multimorbidities. The primary  
11 outcomes were the incidence of preterm birth (PTB), low birth weight (LBW), and small  
12 for gestational age (SGA). Adjusted logistic regression was performed to estimate odds  
13 ratios (aORs) and 95% confidence intervals (CIs).

14 **Results:** Of the 104,062 fetal records, 86,885 singleton pregnant women were analyzed.  
15 The median maternal age and body mass index were 31 years and 20.5 kg/m<sup>2</sup>, respectively.  
16 The prevalence of pregnant women with one or more chronic conditions was 40.2%. The  
17 prevalence of maternal multimorbidity was 6.3%, and that of PTB, LBW, and SGA were  
18 4.6%, 8.1%, and 7.5%, respectively. Pre-pregnancy underweight women were the most

1  
2  
3  
4  
5  
6  
7 19 common, observed in 15.6% of multimorbidity cases, followed by domestic violence  
8  
9  
10 20 from intimate partner in 13.0%. Maternal multimorbidity was significantly associated  
11  
12  
13 21 with PTB (aOR, 1.50; 95% CI, 1.33-1.69), LBW (aOR, 1.49; 95% CI, 1.35-1.63), and  
14  
15  
16 22 SGA (aOR, 1.33; 95% CI, 1.20-1.46).

17  
18 23 **Conclusion:** Maternal multimorbidity was associated with adverse perinatal outcomes,  
19  
20  
21 24 including PTB, LBW, and SGA. The risk of adverse perinatal outcomes tends to increase  
22  
23  
24 25 with a rise in the number of chronic maternal conditions. As multimorbidity becomes  
25  
26  
27 26 more prevalent among pregnant women, making our findings important for preconception  
28  
29  
30 27 counseling.  
31  
32

33  
34  
35  
36 29 **Keywords:** chronic diseases, Japan, low birth weight, multimorbidity, preterm birth,  
37  
38  
39 30 small for gestational age.  
40  
41

42 31  
43  
44  
45 32 **Word counts:** 3,934  
46  
47  
48  
49  
50  
51  
52  
53  
54  
55  
56  
57  
58  
59  
60

1  
2  
3  
4  
5  
6  
7 **33 Strengths and limitations of this study**

8  
9 34

10 ● Including a wide variety of chronic conditions makes the study more comprehensive  
11  
12 concerning to maternal health and wellbeing.  
13  
14 36

15  
16  
17 37

18  
19 ● The study size is robust enough to investigate preterm birth, low birth weight, and  
20  
21 small gestational age; however, the numbers of secondary outcomes such as very  
22  
23 39  
24 preterm birth, very low birth weight, and extremely low birth weight are too small to  
25  
26 40  
27 have enough statistical power.  
28  
29 41

30  
31  
32 42

33  
34 ● Lack of information on the severity of maternal morbidity is a limitation.  
35  
36  
37 44

38  
39  
40 45

41 ● Some self-reported maternal conditions including, such as domestic and substance  
42  
43 abuse, may be underreported.  
44  
45 46

46  
47 47  
48  
49  
50  
51  
52  
53  
54  
55  
56  
57  
58  
59  
60

## 48 INTRODUCTION

49 Multimorbidity is usually defined as the coexistence of two or more chronic physical or  
50 psychological conditions within an individual.<sup>1,2</sup> Multimorbidity has attracted worldwide  
51 attention because of the increased complexity of treatment, consumption of medical care,  
52 and health care costs compared to a single disease.<sup>1,3-5</sup> Multimorbidity is also associated  
53 with high mortality, functional disability, and diminished quality of life.<sup>6-8</sup> For many  
54 countries, there is evidence that a significant proportion of the adult population suffers  
55 from multiple chronic diseases, and the rates are increasing.<sup>2,9</sup> However, the lack of  
56 uniform definitions and classifications of multimorbidity makes it difficult to ascertain  
57 their actual status. Consequently, the existing evidence is fragmented and often difficult  
58 to interpret.<sup>2</sup>

59 Although the prevalence of multimorbidity is highest in those aged 65 years or  
60 older, younger persons, including reproductive-age women, also represent a large  
61 proportion of those with multimorbidity, ranging from 8.7 to 18.8%.<sup>3,4,10,11</sup> Regarding  
62 pregnant women, the prevalence of multimorbidity has varied from 0.83 to 24.2%.<sup>12-14</sup>  
63 Although the prevalence of maternal multimorbidity in Japan has not been thoroughly  
64 studied, the prevalence of individual chronic conditions was 0.9% for chronic  
65 hypertension, 3.4% for diabetes mellitus, 10.6% for obesity, and 18.2% for



1  
2  
3  
4  
5  
6 66 underweight.<sup>15, 16</sup> The number of pregnant women with multimorbidity is expected to  
7  
8  
9 67 increase as with maternal population ages.  
10

11  
12 68 The association between certain specific single maternal chronic diseases and  
13  
14  
15 69 related perinatal outcomes has been well studied; however, there are only a few studies  
16  
17  
18 70 on maternal multimorbidity and perinatal outcomes.<sup>12, 13, 17</sup> The 2020 systematic review  
19  
20  
21 71 in low- and middle-income countries by McCauley et al. classified maternal  
22  
23  
24 72 multimorbidity into three categories: physical morbidity (such as medical, infectious, and  
25  
26  
27 73 obstetrical conditions), psychological morbidity (such as depression and suicidal  
28  
29  
30 74 ideation), and social morbidity (such as domestic violence and substance abuse).<sup>17</sup> The  
31  
32  
33 75 World Health Organization Maternal Morbidity Working Group also considered physical,  
34  
35  
36 76 psychological, and social morbidity to measure maternal morbidity.<sup>18</sup> Domestic violence  
37  
38  
39 77 against pregnant women has also been a social issue in Japan,<sup>19</sup> not only in low- and  
40  
41  
42 78 middle-income countries.  
43  
44

45 79 It has been widely known that maternal physical morbidity such as hypertension,  
46  
47  
48 80 kidney disease, and systemic lupus erythematosus increase the risk of preterm births  
49  
50  
51 81 (PTB) and low birth weight infants (LBW).<sup>20-23</sup> Moreover, maternal psychological and  
52  
53  
54 82 social morbidity has been also associated with PTB and LBW.<sup>24-29</sup> In their review,  
55  
56  
57 83 McCauley et al. were trying to assess the impact of each type of morbidity on women's  
58  
59  
60

1  
2  
3  
4  
5  
6  
7 84 health and well-being during pregnancy and after childbirth, however, a meta-analysis of  
8  
9 85 the associations between multimorbidity and obstetrical complications could not be  
10  
11  
12 86 performed because of the heterogeneity of each study.<sup>17</sup> The evidence of maternal  
13  
14  
15 87 multimorbidity has been insufficient because only a few studies reported the association  
16  
17  
18 88 between maternal multimorbidity and adverse perinatal outcomes.<sup>12, 13</sup> Additionally, a  
19  
20  
21 89 previous study in the United States by Admon et al. underestimated the prevalence of  
22  
23  
24 90 maternal multimorbidity because only eight chronic conditions were included.<sup>13</sup> There is  
25  
26  
27 91 a need to conduct a study covering a broad range of maternal chronic conditions to avoid  
28  
29  
30 92 overlooking pregnant women at risk of potentially adverse perinatal outcomes. Therefore,  
31  
32  
33 93 we hypothesized that the risk of adverse perinatal outcomes, such as PTB, LBW, and  
34  
35  
36 94 small for gestational age (SGA), would increase with the number of chronic maternal  
37  
38  
39 95 conditions present in a woman, including physical, psychological, and social conditions.

40  
41  
42 96 In Japan, the association between maternal multimorbidity and adverse perinatal  
43  
44  
45 97 outcomes has not yet been investigated. The present study aimed to determine the  
46  
47  
48 98 association between maternal multimorbidity and adverse perinatal outcomes, such as  
49  
50  
51 99 PTB, LBW, and SGA, using a Japanese nationwide prospective cohort study.  
52  
53  
54  
55  
56  
57  
58  
59  
60

1  
2  
3  
4  
5  
6 100 **METHODS**

7  
8  
9 101 *Study design and participants*

10  
11  
12 102 This prospective cohort study used the dataset jecs-ta-20190930 from the Japan  
13  
14  
15 103 Environment and Children's Study (JECS). The JECS is an ongoing nationwide birth  
16  
17  
18 104 cohort study in Japan, the details of which have already been reported.<sup>30, 31</sup> Its main aim  
19  
20  
21 105 of the JECS was to investigate the association between environmental factors and  
22  
23  
24 106 children's health and development. The JECS recruited pregnant women from 15 regional  
25  
26  
27 107 centers selected to cover the Japanese geographical areas: Hokkaido, Miyagi, Fukushima,  
28  
29  
30 108 Chiba, Kanagawa, Koshin, Toyama, Aichi, Kyoto, Osaka, Hyogo, Tottori, Kochi,  
31  
32  
33 109 Fukuoka, and South Kyusyu/Okinawa, between January 2011 and March 2014. The  
34  
35  
36 110 recruitment strategy in the JECS is shown in Supplementary Appendix 1.<sup>30</sup>

37  
38  
39 111 During the study period, 104,062 fetal records were included in the baseline  
40  
41  
42 112 survey of the JECS. Miscarriages (n = 1,254), stillbirths (n = 382), and unknown birth  
43  
44  
45 113 outcomes (n = 2,123) were excluded, leaving 100,303 live births in the present study.  
46  
47  
48 114 When a mother had more than one pregnancy, only the first pregnancy was included in  
49  
50  
51 115 this study. After excluding pregnancies in the same mothers, there were 94,753  
52  
53  
54 116 participants. Finally, patients with multiple pregnancies (n = 1,809), pregnancies with  
55  
56  
57 117 chromosomal abnormalities (n = 207), missing values of gestational age at delivery (n =

1  
2  
3  
4  
5  
6 118 286), missing values of neonatal birth weight (n = 69), missing values of medication  
7  
8  
9 119 information (n = 2,166), missing values of domestic violence from intimate partners (n =  
10  
11  
12 120 880), missing values of maternal infection (n = 2,418), and missing values of maternal  
13  
14  
15 121 pre-pregnancy body mass index (BMI) (n = 33) were excluded and the final number of  
16  
17  
18 122 study participants was 86,885 singleton pregnant women (Figure 1). In the SGA analyses,  
19  
20  
21 123 the number of participants decreased to 86,674 because 211 deliveries at a gestational age  
22  
23  
24 124 of > 41 weeks were excluded (Figure 1).

125

### 126 *Ethics*

127 The study protocol was approved by the Ministry of the Environment's Institutional  
128 Review Board on Epidemiological Studies and by the Ethics Committees of all  
129 participating institutions (No. 100910001).<sup>30</sup> The JECS was performed in accordance  
130 with the Declaration of Helsinki. All the participants provided written informed consent.

131

### 132 *Patient and Public Involvement statement*

133 This study did not involve patients or public.

134

### 135 *Maternal and neonatal baseline information*

1  
2  
3  
4  
5  
6 136 Baseline information on the mothers, including educational level, smoking status, and  
7  
8  
9 137 alcohol consumption, was collected from self-administered questionnaires applied to the  
10  
11  
12 138 enrolled pregnant women during the second or third trimesters. Maternal medical history  
13  
14  
15 139 was obtained using self-administered questionnaires and medical record transcripts  
16  
17  
18 140 during the first trimester of pregnancy. A history of domestic violence from an intimate  
19  
20  
21 141 partner was obtained from self-administered questionnaires applied to the enrolled  
22  
23  
24 142 pregnant women during the first trimester. The following maternal information was  
25  
26  
27 143 obtained from the medical record transcripts: maternal infection, neonate's date of birth,  
28  
29  
30 144 parity, and gestational period. Although maternal pre-pregnancy height and weight were  
31  
32  
33 145 collected from medical record transcripts, in instances where the above information was  
34  
35  
36 146 missing, the values were obtained from mothers' self-reports. Maternal age at delivery  
37  
38  
39 147 was calculated from the birth dates of mothers and neonates. Parity was categorized as 0,  
40  
41  
42 148 1, 2, or higher. The categories of maternal smoking status were defined as follows: never;  
43  
44  
45 149 previously did, but quit before recognizing the current pregnancy; previously did, but quit  
46  
47  
48 150 after identifying the current pregnancy; and current smoker. The categories of maternal  
49  
50  
51 151 alcohol consumption were defined as follows: never consumed; previously consumed,  
52  
53  
54 152 but quit before identifying current pregnancy; previously consumed, but quit after  
55  
56  
57 153 identifying current pregnancy; and current drinker. The highest educational level of the  
58  
59  
60

1  
2  
3  
4  
5  
6 154 mother was defined as follows: junior high school, high school, technical junior college,  
7  
8  
9 155 technical/vocational college or associate degree, bachelor's degree, or graduate degree  
10  
11  
12 156 (master/doctor). Annual household income was categorized as follows: <2,000,000;  
13  
14  
15 157 2,000,000–3,990,000; 4,000,000–5,990,000; 6,000,000–7,990,000; 8,000,000–  
16  
17  
18 158 9,990,000; and  $\geq 10,000,000$  JPY. Maternal and neonatal medical information, such as  
19  
20  
21 159 maternal age at delivery, gestational age at delivery, neonatal birth weight, and neonatal  
22  
23  
24 160 sex, were collected from the medical record transcripts at birth.  
25  
26  
27  
28  
29

30 162 ***Exposure: Maternal Multimorbidity***

31  
32  
33 163 In our study, multimorbidity was defined as the coexistence of two or more physical,  
34  
35  
36 164 psychological, or social conditions in an individual according to previous reports.<sup>13, 14, 17,</sup>  
37  
38  
39 165 <sup>18</sup> Maternal chronic conditions included in multimorbidity were defined as the conditions  
40  
41  
42 166 with high prevalence among reproductive-age women or that had the potential to affect  
43  
44  
45 167 perinatal outcomes. The chronic conditions in this study were heterogeneous because the  
46  
47  
48 168 JECS lacked information regarding the disease severity. However, the definition of  
49  
50  
51 169 multimorbidity varies among studies.<sup>18, 32</sup> To identify pregnant women with chronic  
52  
53  
54 170 conditions more rigorously, a maternal chronic condition was defined as a condition that  
55  
56  
57 171 was medically treated at the time of pregnancy. This information was collected from self-  
58  
59  
60

1  
2  
3  
4  
5  
6 172 reports, medical record transcripts, and medication interviews. Maternal chronic  
7  
8  
9 173 conditions included allergic diseases such as asthma, anemia, diabetes mellitus,  
10  
11  
12 174 dyslipidemia, epilepsy, gastric or duodenal ulcer, heart disease, hepatitis, human  
13  
14  
15 175 immunodeficiency virus (HIV) infection, hypertension, inflammatory bowel disease,  
16  
17  
18 176 kidney disease, malignancy, migraine, neurologic disease, other sexually transmitted  
19  
20  
21 177 diseases (*Chlamydia trachomatis* and syphilis), psychiatric disorders, rheumatic or  
22  
23  
24 178 collagen diseases, and thyroid disease.

25  
26  
27 179         Additionally, abnormal pre-pregnancy BMI, including underweight and obesity,  
28  
29  
30 180 physical or verbal domestic violence from intimate partners, and substance abuse, were  
31  
32  
33 181 included in the maternal chronic conditions.<sup>18, 33</sup> Maternal pre-pregnancy BMI was  
34  
35  
36 182 calculated from the maternal pre-pregnancy weight divided by the square of maternal  
37  
38  
39 183 height collected from medical record transcripts or self-reports. Pregnant women were  
40  
41  
42 184 categorized according to their pre-pregnancy BMI as follows: underweight (BMI < 18.5  
43  
44  
45 185 kg/m<sup>2</sup>), normal weight (18.5 kg/m<sup>2</sup> ≤ BMI < 25.0 kg/m<sup>2</sup>), and obesity (BMI ≥ 25.0  
46  
47  
48 186 kg/m<sup>2</sup>).<sup>34, 35</sup> Information on domestic violence from intimate partners was obtained from  
49  
50  
51 187 a questionnaire administered during the first trimester: “Have you been verbally insulted  
52  
53  
54 188 or yelled at by your partner during pregnancy?” and “Have you been physically abused,  
55  
56  
57 189 such as being slapped or beaten, resulting in injury because of a quarrel between you and  
58  
59  
60

1  
2  
3  
4  
5  
6 190 your partner during pregnancy?”<sup>36</sup> Each response was selected from one of four  
7  
8  
9 191 predefined categories: never, rarely, sometimes, and often. If the response “rarely” or  
10  
11  
12 192 “sometimes” or “often” was chosen, it was considered as presence of domestic violence.  
13  
14  
15 193 Medication information was obtained from interviews (Supplementary Appendix 2).<sup>37</sup>  
16  
17  
18 194 Medication was considered relevant from pregnancy diagnosis to 12 weeks of gestation  
19  
20  
21 195 to investigate the impact of maternal pre-pregnancy chronic conditions on perinatal  
22  
23  
24 196 outcomes. The types of medication in early pregnancy included antiallergic drugs, lipid-  
25  
26  
27 197 lowering drugs, antimigraine drugs, anti-parkinsonian drugs, anti-rheumatic drugs,  
28  
29  
30 198 antithyroid drugs, antiviral drugs, anti-cancer drugs, cardiovascular drugs, corticosteroids,  
31  
32  
33 199 gastrointestinal drugs, illegal drugs including marijuana, psychostimulant, ecstasy,  
34  
35  
36 200 thinner, and toluene, insulin preparations, iron preparations, psychoactive drugs,  
37  
38  
39 201 respiratory drugs, and thyroid hormone preparations.<sup>37</sup>  
40

41  
42  
43 202

### 44 45 203 **Outcomes**

46  
47  
48 204 The primary outcome of this study was the incidence of adverse perinatal outcomes,  
49  
50  
51 205 including PTB, LBW, and SGA. The secondary outcomes were the incidences of very  
52  
53  
54 206 preterm birth (VPTB), very low birth weight (VLBW), and extremely low birth weight  
55  
56  
57 207 (ELBW). PTB was defined as a gestational age of less than 37 weeks at delivery. VPTB  
58  
59  
60



1  
2  
3  
4  
5  
6 208 was defined as a gestational age of less than 34 weeks at delivery. LBW, VLBW, and  
7  
8  
9 209 ELBW were defined as neonatal birth weights of less than 2,500 g, 1,500 g, and 1,000 g,  
10  
11  
12 210 respectively. SGA was defined as birth weight below the 10<sup>th</sup> percentile, accounting for  
13  
14  
15 211 parity, gestational age, and neonatal sex according to the Japan Pediatric Society  
16  
17  
18 212 guidelines,<sup>38</sup> and percentiles were calculated using Excel-based clinical tools for growth  
19  
20  
21 213 evaluation of children distributed by the Japanese Society for Pediatric Endocrinology.<sup>39</sup>  
22  
23

24 214

27 215 ***Statistical analysis***

28  
29  
30 216 In the main analyses, adjusted odds ratios (aORs) and 95% confidence intervals (CIs) for  
31  
32  
33 217 adverse perinatal outcomes were estimated using a multivariable logistic regression  
34  
35  
36 218 model adjusted for maternal age at delivery (<20, 20–24, 25–29, 30–34, 35–39, and ≥40  
37  
38  
39 219 years), parity, maternal smoking status, maternal alcohol consumption, maternal  
40  
41  
42 220 educational level, household income, and neonatal sex. In the SGA analyses, parity and  
43  
44  
45 221 neonatal sex were removed from the covariates. These covariates were selected based on  
46  
47  
48 222 previous studies on multimorbidity.<sup>13, 18, 33</sup> Statistical analyses were used to compare  
49  
50  
51 223 pregnant women with multimorbidity or with one chronic condition, to those without  
52  
53  
54 224 chronic conditions as a reference group.

55  
56  
57 225 We used the k-nearest neighbor (kNN) imputation method in the R package  
58  
59  
60

1  
2  
3  
4  
5  
6 226 “VIM” (version 4.1.2; R Foundation for Statistical Computing, Vienna, Austria),<sup>40</sup>  
7  
8  
9 227 introducing all outcomes and adjusted variables because the dataset had some missing  
10  
11  
12 228 values. The covariates such as maternal age, parity, smoking status during pregnancy,  
13  
14  
15 229 drinking status during pregnancy, maternal education, and household income, and  
16  
17  
18 230 neonatal sex, were among the imputed missing data. kNN is a widely accepted single  
19  
20  
21 231 imputation method whose validity has been established.<sup>41</sup> We performed an additional  
22  
23  
24 232 analysis to test the robustness of our findings using a complete dataset, which excluded  
25  
26  
27 233 all missing values. We also analytically evaluated the dose-response relationship between  
28  
29  
30 234 the number of chronic conditions and perinatal adverse outcomes using a detailed  
31  
32  
33 235 classification of the number of chronic conditions (0, 1, 2, 3, and  $\geq 4$ ) and a test for trend.  
34  
35  
36 236 Sensitivity analyses focusing on underweight, obesity, psychiatric disorders, and  
37  
38  
39 237 domestic violence were performed. Each of these chronic conditions was categorized  
40  
41  
42 238 separately as included or not included in the multimorbidity category. The results of these  
43  
44  
45 239 analyses are shown in Supplementary Tables 1, 2 and 3. Statistical significance was  
46  
47  
48 240 defined as a two-tailed *P*-value < 0.05. All analyses, except kNN imputation, were  
49  
50  
51 241 performed using STATA version 16.1, for Windows (Stata Corporation, College Station,  
52  
53  
54 242 TX, USA). kNN imputation was conducted using R (version 4.1.2; R Foundation for  
55  
56  
57 243 Statistical Computing, Vienna, Austria).

## 244 RESULTS

245 Of the 104,062 fetal records included in this study, 17,177 (16.5%) were excluded,  
246 leaving a final number of 86,885 singleton pregnant women (Figure 1). The main and all  
247 maternal characteristics are shown in Table 1 and Supplementary Table 1, respectively.  
248 The median maternal age was 31 years (range, 14-48), and the median pre-pregnancy  
249 BMI was 20.5 kg/m<sup>2</sup> (range, 13.2-52.8). In the present study, 40.2% of pregnant women  
250 had one or more chronic conditions (Table 1). The prevalence of maternal multimorbidity  
251 was 6.3% (5,462/86,885). Regarding perinatal outcomes, the prevalences of PTB and  
252 VPTB were 4.6% and 1.0%, respectively. The prevalences of LBW, VLBW, ELBW, and  
253 SGA were 8.1 %, 0.6%, 0.2%, and 7.5 %, respectively (Table 2). The details of the  
254 maternal chronic conditions are shown in Table 3. Maternal underweight (15.6%) was the  
255 most frequently observed in chronic conditions, followed by domestic violence (13.0%).  
256 The prevalence of maternal obesity was 10.9%. The other most frequent chronic  
257 conditions were allergic diseases (3.1%), other sexually transmitted diseases (1.4%),  
258 anemia (0.7%), psychiatric disorders (0.7%), and thyroid disease (0.7%).

259 Maternal multimorbidity was significantly associated with PTB (aOR, 1.50; 95%  
260 CI, 1.33-1.69), VPTB (aOR, 1.34; 95% CI, 1.03-1.74), LBW (aOR, 1.49; 95% CI, 1.35-  
261 1.63), VLBW (aOR, 1.62; 95% CI, 1.16-2.25), ELBW (aOR, 1.81; 95% CI, 1.12-2.90),

1  
2  
3  
4  
5  
6 262 and SGA (aOR, 1.33; 95% CI, 1.20-1.46) (Table 4). Adjusted odds ratios of PTB, LBW,  
7  
8  
9 263 and SGA tended to increase with multimorbidity rather than with one chronic condition.  
10  
11

12 264 The association between maternal multimorbidity and adverse perinatal  
13  
14  
15 265 outcomes, using the complete dataset, is shown in Supplementary Table 2. Maternal  
16  
17  
18 266 multimorbidity was also significantly associated with PTB, LBW, and SGA, however, it  
19  
20  
21 267 was not associated with VPTB, VLBW and ELBW. Additionally, the aORs of PTB, LBW,  
22  
23  
24 268 and SGA also tended to increase with multimorbidity rather than with one chronic  
25  
26  
27 269 condition.  
28  
29

30 270 Supplementary Table 3 shows the additional analysis for PTB, LBW, and SGA  
31  
32  
33 271 using exposure as the number of chronic conditions (0, 1, 2, 3, and  $\geq 4$ ). All of the trend  
34  
35  
36 272 *P* values were statistically significant.  
37  
38

39 273 Supplementary Table 4 demonstrates the aOR for adverse perinatal outcomes,  
40  
41  
42 274 focusing on each disease, including underweight, obesity, psychiatric disorders, and  
43  
44  
45 275 domestic violence. Regarding PTB and LBW, significant differences were found between  
46  
47  
48 276 maternal multimorbidity and no chronic conditions, regardless of the presence or absence  
49  
50  
51 277 of specific chronic conditions (Supplementary Table 4A-D). For SGA, maternal  
52  
53  
54 278 multimorbidity with underweight, without obesity, without psychiatric disorder, and with  
55  
56  
57 279 and without domestic violence showed significant differences compared to no chronic  
58  
59  
60

1  
2  
3  
4  
5  
6  
7  
8  
9  
10  
11  
12  
13  
14  
15  
16  
17  
18  
19  
20  
21  
22  
23  
24  
25  
26  
27  
28  
29  
30  
31  
32  
33  
34  
35  
36  
37  
38  
39  
40  
41  
42  
43  
44  
45  
46  
47  
48  
49  
50  
51  
52  
53  
54  
55  
56  
57  
58  
59  
60

280 conditions (Supplementary Table 4A-D).

For peer review only

1  
2  
3  
4  
5  
6 281 **DISCUSSION**  
7  
8

9 282 In this study, one-third of pregnant women had one or more chronic conditions, and the  
10  
11  
12 283 prevalence of maternal multimorbidity was lower than that in previous studies.<sup>3,4</sup> Among  
13  
14  
15 284 maternal chronic conditions, pre-pregnancy underweight was the most common, followed  
16  
17  
18 285 by domestic violence and pre-pregnancy obesity. This study showed that maternal  
19  
20  
21 286 multimorbidity was significantly associated with PTB, LBW, and SGA. The number of  
22  
23  
24 287 chronic conditions in the mother tends to increase the risk of adverse perinatal outcomes.  
25  
26

27 288 To our knowledge, the present study is the first to investigate the association  
28  
29  
30 289 between maternal multimorbidity, including physical, psychological, and social  
31  
32  
33 290 morbidities, with perinatal outcomes. In the present study, the use of data from the JECS,  
34  
35  
36 291 including 100,000 Japanese mothers and neonates, made it possible to study  
37  
38  
39 292 multimorbidities. The incidence of adverse perinatal outcomes was sufficient to  
40  
41  
42 293 investigate the influence of maternal multimorbidity on PTB, LBW, and SGA.  
43  
44

45 294 However, this study has several limitations. First, the prevalence of maternal  
46  
47  
48 295 multimorbidity in this study was 6.3%, which was lower than the prevalence noted in  
49  
50  
51 296 reproductive-aged women in previous studies.<sup>3, 4, 14</sup> The strict definition of a chronic  
52  
53  
54 297 condition in our study may be responsible for the lower prevalence of maternal  
55  
56  
57 298 multimorbidity than in previous studies. However, there is no consensus on the definition  
58  
59  
60

1  
2  
3  
4  
5  
6 299 of maternal multimorbidity or classification system for reporting.<sup>2, 32</sup> Second, the details  
7  
8  
9 300 of the differences in risk by the combination of chronic conditions were not identified.  
10  
11  
12 301 The risk of adverse perinatal outcomes may vary depending on the combination of the  
13  
14  
15 302 chronic conditions. Although sensitivity analyses focusing on underweight, obesity,  
16  
17  
18 303 psychiatric disorders, and domestic violence demonstrated the association of adverse  
19  
20  
21 304 perinatal outcomes with the presence or absence of each condition, no further detailed  
22  
23  
24 305 studies were conducted because the main aim of this study was not to examine the impact  
25  
26  
27 306 of each chronic condition. Third, some self-reported biases may exist. Self-reported body  
28  
29  
30 307 weight may be underestimated for underweight and overestimated for obesity.<sup>42, 43</sup> The  
31  
32  
33 308 prevalence of self-reported domestic violence may be underestimated due to social  
34  
35  
36 309 desirability bias.<sup>44</sup> Forth, the numbers of VPTB, VLBW, and ELBW cases were small.  
37  
38  
39 310 This study was insufficient to investigate these severe adverse outcomes.

41  
42 311 Conducting studies on maternal multimorbidity has been challenging because  
43  
44  
45 312 there is no agreed definition or uniform measurement tool for multimorbidity.<sup>32</sup> A  
46  
47  
48 313 systematic review of multimorbidity in 2012 by Fortin et al.<sup>3</sup> reported that the prevalence  
49  
50  
51 314 of multimorbidity seemed to be influenced by the operational definition of chronic  
52  
53  
54 315 conditions. Moreover, most studies on multimorbidity conducted in the general  
55  
56  
57 316 population predominantly used questionnaires. As this method was based on self-report,  
58  
59  
60

1  
2  
3  
4  
5  
6 317 it might present the disadvantage of assigning equal weight to both major and minor  
7  
8  
9 318 chronic conditions.<sup>3</sup> Although the present study also used self-report questionnaires,  
10  
11  
12 319 multimorbidity was defined as chronic conditions treated with medication to reduce the  
13  
14  
15 320 variability in the severity of chronic conditions in multimorbidity. However, our method  
16  
17  
18 321 may have decreased the prevalence of multimorbidities.  
19

20  
21 322 This study comprised 23 chronic conditions, which included not only physical  
22  
23  
24 323 morbidity, but also psychological and social morbidity. A systematic review of  
25  
26  
27 324 multimorbidity by Fortin et al.<sup>3</sup> suggested using a list of at least the 12 most prevalent  
28  
29  
30 325 chronic conditions to conduct studies on multimorbidity. In a previous study by Admon  
31  
32  
33 326 et al.<sup>13</sup> on maternal multimorbidity, only seven physical and one social morbidity were  
34  
35  
36 327 defined as chronic conditions, and the prevalence of one chronic condition and  
37  
38  
39 328 multimorbidity were 8.4% and 0.83%, respectively. These values are much lower than  
40  
41  
42 329 those of our results. Although it has been controversial which chronic conditions should  
43  
44  
45 330 be included in maternal multimorbidity, our study may have reduced the chance of  
46  
47  
48 331 missing pregnant women at a potential risk of adverse perinatal outcomes.  
49

50  
51 332 The present study confirmed that an increase in the number of chronic maternal  
52  
53  
54 333 conditions increases the risk of PTB, LBW, and SGA. In a study on chronic diseases in  
55  
56  
57 334 pregnant women in Germany, pregnant women with at least one chronic condition had an  
58  
59  
60



1  
2  
3  
4  
5  
6 335 increased risk of PTB.<sup>12</sup> A study on maternal multimorbidity in the United States reported  
7  
8  
9 336 that the incidence of PTB less than 37 weeks of gestation, cesarean delivery, severe  
10  
11  
12 337 maternal morbidity, and mortality in pregnant women with multimorbidity was higher  
13  
14  
15 338 than those without chronic conditions.<sup>13</sup> These results were consistent with the present  
16  
17  
18 339 study, although the definition of maternal chronic conditions was different from our study.  
19  
20

21 340 In maternal multimorbidity, medication during pregnancy may affect perinatal  
22  
23  
24 341 outcomes. The present study defined a physical or psychological condition as one that  
25  
26  
27 342 required medical attention during pregnancy. The study on the exposure to medication  
28  
29  
30 343 for hypertension, diabetes, and autoimmune disease during pregnancy reported that the  
31  
32  
33 344 ORs of PTB, LBW, and SGA were higher in the antihypertensives and corticosteroids  
34  
35  
36 345 exposed group compared with those in the unexposed group.<sup>45</sup> However, it was also  
37  
38  
39 346 reported that chronic conditions, with or without medication exposure, may have affected  
40  
41  
42 347 perinatal outcomes.  
43  
44

45 348 Chronic physical conditions such as hypertension, kidney disease, systemic  
46  
47  
48 349 lupus erythematosus, and abnormal pre-pregnancy BMI are associated with adverse  
49  
50  
51 350 perinatal outcomes.<sup>20-23, 46, 47</sup> Our findings also indicated that multimorbidity might alter  
52  
53  
54 351 the risk of PTB, LBW, and SGA depending on whether multimorbidity included or did  
55  
56  
57 352 not include abnormal BMI. Additionally, maternal infections, such as HIV, malaria,  
58  
59  
60

1  
2  
3  
4  
5  
6  
7 353 syphilis, and tuberculosis, have been reported to be associated with adverse perinatal  
8  
9 354 outcomes.<sup>48-51</sup> However, the influence of these infections may be small in the present  
10  
11  
12 355 study because the prevalence of these maternal infections was very low in Japan.

13  
14  
15 356 Although the prevalence of psychiatric disorders was 0.7% in the present study,  
16  
17  
18 357 which was very low compared to a previous systematic review of adult women,<sup>52</sup> maternal  
19  
20  
21 358 psychological morbidity was also associated with adverse perinatal outcomes.<sup>25, 26, 52</sup> The  
22  
23  
24 359 present study also showed that the risk of PTB and SGA might vary depending on the  
25  
26  
27 360 presence or absence of psychiatric disorders. In previous studies on depression during  
28  
29  
30 361 pregnancy, depression was found to be associated with PTB, LBW, and SGA.<sup>25, 26</sup> In  
31  
32  
33 362 addition, common antenatal mental disorders also increased the risk of PTB and LBW.<sup>53</sup>

34  
35  
36 363 In the present study, domestic violence from intimate partners was the second  
37  
38  
39 364 most frequent chronic condition at 13.0%. Multimorbidity with and without domestic  
40  
41  
42 365 violence was significantly associated with PTB, LBW, and SGA, although the point  
43  
44  
45 366 estimate of the aOR for multimorbidity with domestic violence was slightly smaller than  
46  
47  
48 367 the aOR for those without domestic violence in this study. Social morbidity, including  
49  
50  
51 368 domestic violence, has been highlighted as a risk factor associated with adverse perinatal  
52  
53  
54 369 outcomes.<sup>17, 28, 29</sup> A cross-sectional study in Iran found a significant association between  
55  
56  
57 370 intimate partner violence during pregnancy and PTB.<sup>28</sup> A prospective cohort study in

1  
2  
3  
4  
5  
6 371 Tanzania reported that physical violence during pregnancy significantly increased the risk  
7  
8  
9 372 of PTB and LBW.<sup>29</sup> However, a population-based study in Canada reported no  
10  
11  
12 373 association between domestic violence before and during pregnancy and adverse perinatal  
13  
14  
15 374 outcomes, including PTB and SGA.<sup>54</sup> This previous study had the limitation that the  
16  
17  
18 375 prevalence of domestic violence was 10.9% and only 3.3% occurred during pregnancy.<sup>54</sup>  
19  
20

21 376 The mechanism by which maternal multimorbidity affected perinatal outcomes  
22  
23  
24 377 was not clear in the present study. However, maternal multimorbidity appears to affect  
25  
26  
27 378 perinatal outcomes as both an intermediate and direct factor. For example, abnormal  
28  
29  
30 379 maternal BMI, such as underweight and obesity, is known to be an independent risk factor  
31  
32  
33 380 for PTB.<sup>55</sup> Maternal obesity is also a risk factor for preeclampsia.<sup>56</sup> Furthermore,  
34  
35  
36 381 preeclampsia promotes the development of PTB. After all, both maternal obesity and  
37  
38  
39 382 preeclampsia are regarded as risk factors for PTB. PTB is considered a syndrome initiated  
40  
41  
42 383 by multiple mechanism, including infection or inflammation, uteroplacental ischemia or  
43  
44  
45 384 hemorrhage, uterine overdistension, stress, and other immunologically mediated  
46  
47  
48 385 processes.<sup>57</sup> In addition, the associations between other chronic diseases such as  
49  
50  
51 386 hypertension, kidney disease, and autoimmune disease and PTB are similar to the  
52  
53  
54 387 association between obesity and PTB.<sup>20-23</sup> Therefore, we hypothesized that each chronic  
55  
56  
57 388 condition that composes multimorbidity, such as underweight, obesity, psychiatric  
58  
59  
60

1  
2  
3  
4  
5  
6 389 disorder, and domestic violence, played an intermediate or direct role in perinatal  
7  
8  
9 390 outcomes, and that the combination of these chronic conditions might further increase the  
10  
11  
12 391 risk of adverse perinatal outcomes.<sup>2</sup>  
13  
14

15 392

### 18 393 **CONCLUSIONS**

21 394 The present study reported an association between maternal multimorbidity and adverse  
22  
23  
24 395 perinatal outcomes including PTB, LBW, and SGA. The risk of adverse perinatal  
25  
26  
27 396 outcomes tends to increase as the number of chronic maternal conditions increases. Since  
28  
29  
30 397 the number of reproductive-aged women with multimorbidity has been increasing as the  
31  
32  
33 398 maternal population ages, preconception care for maternal multimorbidity is becoming  
34  
35  
36 399 increasingly important. Our findings provide essential information for preconception  
37  
38  
39 400 counseling in women with multimorbidities.  
40  
41  
42  
43  
44  
45  
46  
47  
48  
49  
50  
51  
52  
53  
54  
55  
56  
57  
58  
59  
60

1  
2  
3  
4  
5  
6 401 **Acknowledgements**  
7

8  
9 402 We would like to express our gratitude to all the JECS study participants and all staff  
10  
11  
12 403 members involved in data collection. Members of the JECS Group as of 2021: Michihiro  
13  
14  
15 404 Kamijima (principal investigator, Nagoya City University, Nagoya, Japan), Shin  
16  
17  
18 405 Yamazaki (National Institute for Environmental Studies, Tsukuba, Japan), Yukihiro Ohya  
19  
20  
21 406 (National Center for Child Health and Development, Tokyo, Japan), Reiko Kishi  
22  
23  
24 407 (Hokkaido University, Sapporo, Japan), Nobuo Yaegashi (Tohoku University, Sendai,  
25  
26  
27 408 Japan), Koichi Hashimoto (Fukushima Medical University, Fukushima, Japan), Chisato  
28  
29  
30 409 Mori (Chiba University, Chiba, Japan), Shuichi Ito (Yokohama City University,  
31  
32  
33 410 Yokohama, Japan), Zentaro Yamagata (University of Yamanashi, Chuo, Japan),  
34  
35  
36 411 Hidekuni Inadera (University of Toyama, Toyama, Japan), Takeo Nakayama (Kyoto  
37  
38  
39 412 University, Kyoto, Japan), Hiroyasu Iso (Osaka University, Suita, Japan), Masayuki  
40  
41  
42 413 Shima (Hyogo College of Medicine, Nishinomiya, Japan), Hiroshige Nakamura (Tottori  
43  
44  
45 414 University, Yonago, Japan), Narufumi Suganuma (Kochi University, Nankoku, Japan),  
46  
47  
48 415 Koichi Kusuhara (University of Occupational and Environmental Health, Kitakyushu,  
49  
50  
51 416 Japan), and Takahiko Katoh (Kumamoto University, Kumamoto, Japan).  
52  
53  
54 417 We would like to thank Editage ([www.editage.com](http://www.editage.com)) for the English language editing.  
55  
56

57 418  
58  
59  
60

1  
2  
3  
4  
5  
6  
7  
8  
9  
10  
11  
12  
13  
14  
15  
16  
17  
18  
19  
20  
21  
22  
23  
24  
25  
26  
27  
28  
29  
30  
31  
32  
33  
34  
35  
36  
37  
38  
39  
40  
41  
42  
43  
44  
45  
46  
47  
48  
49  
50  
51  
52  
53  
54  
55  
56  
57  
58  
59  
60

419 **Contributors**

420 KN and YaS designed the study. YaS, EY, KN, ST, YI, SK, CM, AA, RK, and the JECS

421 Group collected data. KN and YaS conducted the data analysis. KN, YaS, EY, YuS, YK,

422 KN, ST, YI, SK, CM, AA, and RK contributed to the data interpretation. YaS, EY, YuS,

423 YK, KN, ST, YI, SK, CM, AA, RK, and the JECS Group conducted the critical reviews.

424 KN drafted the manuscript. YaS made critical revisions. All authors reviewed and

425 commented on the manuscript. All authors approved the final manuscript.

426

427 **Funding statement**

428 This study was funded by the Ministry of Environment of Japan. The findings and

429 conclusions of this article are solely the responsibility of the authors and do not represent

430 the official views of the government.

431

432 **Competing interests**

433 The authors declare that they have no competing interests.

434

435 **Patient consent for publication**

436 Not applicable.

1  
2  
3  
4  
5  
6 437  
7  
8

9 438 **Ethics approval**

10  
11  
12 439 The study protocol was approved by the Ministry of the Environment's Institutional  
13  
14  
15 440 Review Board on Epidemiological Studies and by the Ethics Committees of all  
16  
17  
18 441 participating institutions (No. 100910001). The JECS was performed in accordance with  
19  
20  
21 442 the Declaration of Helsinki. All the participants provided written informed consent.  
22  
23

24 443

25  
26  
27 444 **Provenance and peer review**

28  
29  
30 445 Not commissioned; externally peer reviewed.  
31  
32

33 446

34  
35  
36 447 **Data availability statement**

37  
38  
39 448 Data are unsuitable for public deposition because of ethical restrictions and Japan's legal  
40  
41  
42 449 framework. The Act on the Protection of Personal Information (Act No. 57 of May 30,  
43  
44  
45 450 2003, amended on September 9, 2015) prohibits making data containing personal  
46  
47  
48 451 information publicly available. The Ethical Guidelines for Medical and Health Research  
49  
50  
51 452 Involving Human Subjects enforced by the Japan Ministry of Education, Culture, Sports,  
52  
53  
54 453 Science and Technology and the Ministry of Health, Labour and Welfare also restrict the  
55  
56  
57 454 open sharing of epidemiological data. All inquiries about access to data were sent to jecs-  
58  
59  
60

1  
2  
3  
4  
5  
6 455 en@nies.go.jp. The person responsible for handling inquiries sent to this e-mail address  
7  
8  
9 456 is Dr. Shoji F. Nakayama, JECS Program Office, National Institute for Environmental  
10  
11  
12 457 Studies.  
13  
14  
15  
16  
17  
18  
19  
20  
21  
22  
23  
24  
25  
26  
27  
28  
29  
30  
31  
32  
33  
34  
35  
36  
37  
38  
39  
40  
41  
42  
43  
44  
45  
46  
47  
48  
49  
50  
51  
52  
53  
54  
55  
56  
57  
58  
59  
60

For peer review only



459 **References**

- 460 1. van den Akker M, Buntinx F, Metsemakers JF, Roos S, Knottnerus JA.  
461 Multimorbidity in general practice: prevalence, incidence, and determinants of co-  
462 occurring chronic and recurrent diseases. *J Clin Epidemiol*. 1998;51:367-375. doi:  
463 10.1016/s0895-4356(97)00306-5.
- 464 2. The Academy of Medical Science. Multimorbidity: a priority for global health  
465 challenge 2018. <https://acmedsci.ac.uk/file-download/82222577>. Accessed 21  
466 July 2022.
- 467 3. Fortin M, Stewart M, Poitras ME, Almirall J, Maddocks H. A systematic review  
468 of prevalence studies on multimorbidity: toward a more uniform methodology.  
469 *Ann Fam Med*. 2012;10:142-151. doi: 10.1370/afm.1337.
- 470 4. Barnett K, Mercer SW, Norbury M, Watt G, Wyke S, Guthrie B. Epidemiology  
471 of multimorbidity and implications for health care, research, and medical  
472 education: a cross-sectional study. *Lancet*. 2012;380:37-43. doi: 10.1016/s0140-  
473 6736(12)60240-2.
- 474 5. Brown HK, McKnight A, Aker A. Association between pre-pregnancy  
475 multimorbidity and adverse maternal outcomes: A systematic review. *J*  
476 *Multimorb Comorb*. 2022;12:26335565221096584. doi:

- 1  
2  
3  
4  
5  
6 477 10.1177/26335565221096584.  
7  
8  
9 478 6. Gijzen R, Hoeymans N, Schellevis FG, Ruwaard D, Satariano WA, van den Bos  
10  
11  
12 479 GA. Causes and consequences of comorbidity: a review. *J Clin Epidemiol.*  
13  
14  
15 480 2001;54:661-674. doi: 10.1016/s0895-4356(00)00363-2.  
16  
17  
18 481 7. Kadam UT, Croft PR. Clinical multimorbidity and physical function in older  
19  
20  
21 482 adults: a record and health status linkage study in general practice. *Fam Pract.*  
22  
23  
24 483 2007;24:412-419. doi: 10.1093/fampra/cmm049.  
25  
26  
27 484 8. Fortin M, Lapointe L, Hudon C, Vanasse A, Ntetu AL, Maltais D. Multimorbidity  
28  
29  
30 485 and quality of life in primary care: a systematic review. *Health Qual Life*  
31  
32  
33 486 *Outcomes.* 2004;2:51. doi: 10.1186/1477-7525-2-51.  
34  
35  
36 487 9. Uijen AA, van de Lisdonk EH. Multimorbidity in primary care: prevalence and  
37  
38  
39 488 trend over the last 20 years. *Eur J Gen Pract.* 2008;14 Suppl 1:28-32. doi:  
40  
41  
42 489 10.1080/13814780802436093.  
43  
44  
45 490 10. Rocca WA, Boyd CM, Grossardt BR, Bobo WV, Finney Rutten LJ, Roger VL, et  
46  
47  
48 491 al. Prevalence of multimorbidity in a geographically defined American  
49  
50  
51 492 population: patterns by age, sex, and race/ethnicity. *Mayo Clin Proc.*  
52  
53  
54 493 2014;89:1336-1349. doi: 10.1016/j.mayocp.2014.07.010.  
55  
56  
57 494 11. Maciejewski ML, Hammill BG. Measuring the burden of multimorbidity among  
58  
59  
60

- 1  
2  
3  
4  
5  
6 495 Medicare beneficiaries via condition counts and cumulative duration. *Health Serv*  
7  
8  
9 496 *Res.* 2019;54:484-491. doi: 10.1111/1475-6773.13124.  
10  
11  
12 497 12. Kersten I, Lange AE, Haas JP, Fusch C, Lode H, Hoffmann W, et al. Chronic  
13  
14  
15 498 diseases in pregnant women: prevalence and birth outcomes based on the SNIp-  
16  
17  
18 499 study. *BMC Pregnancy Childbirth.* 2014;14:75. doi: 10.1186/1471-2393-14-75.  
19  
20  
21 500 13. Admon LK, Winkelman TNA, Heisler M, Dalton VK. Obstetric outcomes and  
22  
23  
24 501 delivery-related health care utilization and costs among pregnant women with  
25  
26  
27 502 multiple chronic conditions. *Prev Chronic Dis.* 2018;15:E21. doi:  
28  
29  
30 503 10.5888/pcd15.170397.  
31  
32  
33 504 14. Lee SI, Azcoaga-Lorenzo A, Agrawal U, Kennedy JI, Fagbamigbe AF, Hope H,  
34  
35  
36 505 et al. Epidemiology of pre-existing multimorbidity in pregnant women in the UK  
37  
38  
39 506 in 2018: a population-based cross-sectional study. *BMC Pregnancy Childbirth.*  
40  
41  
42 507 2022;22:120. doi: 10.1186/s12884-022-04442-3.  
43  
44  
45 508 15 Japanese Ministry of Health, Labour and Welfare. The 2nd Study Group on the  
46  
47  
48 509 Health and Medical Care System for Expectant and Nursing Mothers. 2019.  
49  
50  
51 510 [https://www.mhlw.go.jp/stf/newpage\\_03949.html](https://www.mhlw.go.jp/stf/newpage_03949.html). Accessed 24 Jan 2023.  
52  
53  
54 511 16. Enomoto K, Aoki S, Toma R, Fujiwara K, Sakamaki K, Hirahara F. Pregnancy  
55  
56  
57 512 Outcomes Based on Pre-Pregnancy Body Mass Index in Japanese Women. *PLoS*  
58  
59  
60

- 1  
2  
3  
4  
5  
6 513 One. 2016;11:e0157081. doi: 10.1371/journal.pone.0157081.  
7  
8  
9 514  
10  
11  
12 515 17. McCauley M, Zafar S, van den Broek N. Maternal multimorbidity during  
13  
14  
15 516 pregnancy and after childbirth in women in low- and middle-income countries: a  
16  
17  
18 517 systematic literature review. BMC Pregnancy Childbirth. 2020;20:637. doi:  
19  
20  
21 518 10.1186/s12884-020-03303-1.  
22  
23  
24 519 18. Barreix M, Barbour K, McCaw-Binns A, Chou D, Petzold M, Gichuhi GN, et al.  
25  
26  
27 520 Standardizing the measurement of maternal morbidity: pilot study results. Int J  
28  
29  
30 521 Gynaecol Obstet. 2018;141 Suppl 1:10-19. doi: 10.1002/ijgo.12464.  
31  
32  
33 522 19. Miura A, Fujiwara T. Intimate Partner Violence during Pregnancy and Postpartum  
34  
35  
36 523 Depression in Japan: A Cross-sectional Study. Front Public Health. 2017;5:81.  
37  
38  
39 524 doi: 10.3389/fpubh.2017.00081.  
40  
41  
42 525 20. Al Khalaf S, Bodunde E, Maher GM, O'Reilly ÉJ, McCarthy FP, O'Shaughnessy  
43  
44  
45 526 M, et al. Chronic kidney disease and adverse pregnancy outcomes: A systematic  
46  
47  
48 527 review and meta-analysis. Am J Obstet Gynecol. 2021. doi:  
49  
50  
51 528 10.1016/j.ajog.2021.10.037.  
52  
53  
54 529 21. Al Khalaf SY, O'Reilly ÉJ, McCarthy FP, Kublickas M, Kublickiene K, Khashan  
55  
56  
57 530 AS. Pregnancy outcomes in women with chronic kidney disease and chronic  
58  
59  
60

- 1  
2  
3  
4  
5  
6 531 hypertension: a National cohort study. *Am J Obstet Gynecol.*  
7  
8  
9 532 2021;225:298.e1-e20. doi: 10.1016/j.ajog.2021.03.045.  
10  
11  
12 533 22. Agrawal A, Wenger NK. Hypertension during pregnancy. *Curr Hypertens Rep.*  
13  
14  
15 534 2020;22:64. doi: 10.1007/s11906-020-01070-0.  
16  
17  
18 535 23. Polić A, Običan SG. Pregnancy in systemic lupus erythematosus. *Birth Defects*  
19  
20  
21 536 *Res.* 2020;112:1115-1125. doi: 10.1002/bdr2.1790.  
22  
23  
24 537 24. Paarlberg KM, Vingerhoets AJ, Passchier J, Dekker GA, Van Geijn HP.  
25  
26  
27 538 Psychosocial factors and pregnancy outcome: a review with emphasis on  
28  
29  
30 539 methodological issues. *J Psychosom Res.* 1995;39:563-595. doi: 10.1016/0022-  
31  
32  
33 540 3999(95)00018-6.  
34  
35  
36 541 25. Bonari L, Pinto N, Ahn E, Einarson A, Steiner M, Koren G. Perinatal risks of  
37  
38  
39 542 untreated depression during pregnancy. *Can J Psychiatry.* 2004;49:726-735. doi:  
40  
41  
42 543 10.1177/070674370404901103.  
43  
44  
45 544 26. Rahman A, Bunn J, Lovel H, Creed F. Association between antenatal depression  
46  
47  
48 545 and low birthweight in a developing country. *Acta Psychiatr Scand.*  
49  
50  
51 546 2007;115:481-486. doi: 10.1111/j.1600-0447.2006.00950.x.  
52  
53  
54 547 27. Wado YD, Afework MF, Hindin MJ. Effects of maternal pregnancy intention,  
55  
56  
57 548 depressive symptoms and social support on risk of low birth weight: a prospective  
58  
59  
60

- 1  
2  
3  
4  
5  
6 549 study from southwestern Ethiopia. PLOS ONE. 2014;9:e96304. doi:  
7  
8  
9 550 10.1371/journal.pone.0096304.  
10  
11  
12 551 28. Hassan M, Kashanian M, Hassan M, Roohi M, Yousefi H. Maternal outcomes of  
13  
14  
15 552 intimate partner violence during pregnancy: study in Iran. Public Health.  
16  
17  
18 553 2014;128:410-415. doi: 10.1016/j.puhe.2013.11.007.  
19  
20  
21 554 29. Sigalla GN, Mushi D, Meyrowitsch DW, Manongi R, Rogathi JJ, Gammeltoft T,  
22  
23  
24 555 et al. Intimate partner violence during pregnancy and its association with preterm  
25  
26  
27 556 birth and low birth weight in Tanzania: A prospective cohort study. PLOS ONE.  
28  
29  
30 557 2017;12:e0172540. doi: 10.1371/journal.pone.0172540.  
31  
32  
33 558 30. Kawamoto T, Nitta H, Murata K, Toda E, Tsukamoto N, Hasegawa M, et al.  
34  
35  
36 559 Rationale and study design of the Japan environment and children's study (JECS).  
37  
38  
39 560 BMC Public Health. 2014;14:25. doi: 10.1186/1471-2458-14-25.  
40  
41  
42 561 31. Michikawa T, Nitta H, Nakayama SF, Yamazaki S, Isobe T, Tamura K, et al.  
43  
44  
45 562 Baseline profile of participants in the Japan environment and children's study  
46  
47  
48 563 (JECS). J Epidemiol. 2018;28:99-104. doi: 10.2188/jea.JE20170018.  
49  
50  
51 564 32. Stirland LE, González-Saavedra L, Mullin DS, Ritchie CW, Muniz-Terrera G,  
52  
53  
54 565 Russ TC. Measuring multimorbidity beyond counting diseases: systematic review  
55  
56  
57 566 of community and population studies and guide to index choice. BMJ.  
58  
59  
60

- 1  
2  
3  
4  
5  
6 567 2020;368:m160. doi: 10.1136/bmj.m160.  
7  
8  
9 568 33. McCauley M, Madaj B, White SA, Dickinson F, Bar-Zev S, Aminu M, et al.  
10  
11  
12 569 Burden of physical, psychological and social ill-health during and after pregnancy  
13  
14  
15 570 among women in India, Pakistan, Kenya and Malawi. *BMJ Glob Health*.  
16  
17  
18 571 2018;3:e000625. doi: 10.1136/bmjgh-2017-000625.  
19  
20  
21 572 34. Suzuki S. Optimal Pre-Pregnancy Body Mass Index Cut-Offs for Obesity in Japan.  
22  
23  
24 573 *J Clin Med Res*. 2017;9:180-1. doi: 10.14740/jocmr2883w.  
25  
26  
27 574 35. Nomura K, Minamizono S, Nagashima K, Ono M, Kitano N. Maternal Body Mass  
28  
29  
30 575 Index and Breastfeeding Non-Initiation and Cessation: A Quantitative Review of  
31  
32  
33 576 the Literature. *Nutrients*. 2020;12. doi: 10.3390/nu12092684.  
34  
35  
36 577 36. Komori K, Komori M, Eitoku M, Joelle Muchanga SM, Ninomiya H, Kobayashi  
37  
38  
39 578 T, et al. Verbal abuse during pregnancy increases frequency of newborn hearing  
40  
41  
42 579 screening referral: the Japan Environment and Children's Study. *Child Abuse*  
43  
44  
45 580 *Negl*. 2019;90:193-201. doi: 10.1016/j.chiabu.2019.01.025.  
46  
47  
48 581 37. Nishigori H, Obara T, Nishigori T, Metoki H, Ishikuro M, Mizuno S, et al. Drug  
49  
50  
51 582 use before and during pregnancy in Japan: the Japan environment and children's  
52  
53  
54 583 study. *Pharmacy (Basel)*. 2017;5. doi: 10.3390/pharmacy5020021.  
55  
56  
57 584 38. Itabashi K, Fujimura M, Kusuda S. Introduction of the new standard for birth size  
58  
59  
60

- 1  
2  
3  
4  
5  
6 585 by gestational ages. *J Jpn Pediatr Soc.* 2010;1271-1293 (in Japanese).  
7  
8  
9 586 39. Endocrinology TJSfP. Excel-based clinical tools for growth evaluation of children.  
10  
11  
12 587 [http://jspe.umin.jp/medical/chart\\_dl.html](http://jspe.umin.jp/medical/chart_dl.html). Accessed 30 July 2021. (in Japanese).  
13  
14  
15 588 40. Kowarik A, Templ M. Imputation with the R package VIM. *J Stat Soft.* 2016;74:1-  
16  
17  
18 589 16.  
19  
20  
21 590 41. Jerez JM, Molina I, García-Laencina PJ, Alba E, Ribelles N, Martín M, et al.  
22  
23  
24 591 Missing data imputation using statistical and machine learning methods in a real  
25  
26  
27 592 breast cancer problem. *Artif Intell Med.* 2010;50:105-15. doi:  
28  
29  
30 593 10.1016/j.artmed.2010.05.002  
31  
32  
33 594 42. Seijo M, Minckas N, Cormick G, Comandé D, Ciapponi A, BelizÁN JM.  
34  
35  
36 595 Comparison of self-reported and directly measured weight and height among  
37  
38  
39 596 women of reproductive age: a systematic review and meta-analysis. *Acta Obstet*  
40  
41  
42 597 *Gynecol Scand.* 2018;97:429-39. doi: 10.1111/aogs.13326.  
43  
44  
45 598 43. Okamoto N, Hosono A, Shibata K, Tsujimura S, Oka K, Fujita H, et al. Accuracy  
46  
47  
48 599 of self-reported height, weight and waist circumference in a Japanese sample.  
49  
50  
51 600 *Obes Sci Pract.* 2017;3:417-24. doi: 10.1002/osp4.122.  
52  
53  
54 601 44. Köksal S, Pesando LM, Rotondi V, Şanlıtürk E. Harnessing the Potential of  
55  
56  
57 602 Google Searches for Understanding Dynamics of Intimate Partner Violence  
58  
59  
60



- 1  
2  
3  
4  
5  
6 603 Before and After the COVID-19 Outbreak. *Eur J Popul.* 2022;38:517-45. doi:  
7  
8  
9 604 10.1007/s10680-022-09619-2.  
10  
11  
12 605 45. Sato R, Ikuma M, Takagi K, Yamagishi Y, Asano J, Matsunaga Y, et al. Exposure  
13  
14  
15 606 of drugs for hypertension, diabetes, and autoimmune disease during pregnancy  
16  
17  
18 607 and perinatal outcomes: an investigation of the regulator in Japan. *Medicine*  
19  
20  
21 608 (Baltimore). 2015;94:e386. doi: 10.1097/md.0000000000000386.  
22  
23  
24 609 46. Santos S, Voerman E, Amiano P, Barros H, Beilin LJ, Bergström A, et al. Impact  
25  
26  
27 610 of maternal body mass index and gestational weight gain on pregnancy  
28  
29  
30 611 complications: an individual participant data meta-analysis of European, North  
31  
32  
33 612 American and Australian cohorts. *BJOG.* 2019;126:984-995. doi: 10.1111/1471-  
34  
35  
36 613 0528.15661.  
37  
38  
39 614 47. Vats H, Saxena R, Sachdeva MP, Walia GK, Gupta V. Impact of maternal pre-  
40  
41  
42 615 pregnancy body mass index on maternal, fetal and neonatal adverse outcomes in  
43  
44  
45 616 the worldwide populations: A systematic review and meta-analysis. *Obes Res*  
46  
47  
48 617 *Clin Pract.* 2021;15:536-545. doi: 10.1016/j.orcp.2021.10.005.  
49  
50  
51 618 48. Shinar S, Agrawal S, Ryu M, Walmsley S, Serghides L, Yudin MH, et al. Perinatal  
52  
53  
54 619 outcomes in women living with HIV-1 and receiving antiretroviral therapy-a  
55  
56  
57 620 systematic review and meta-analysis. *Acta Obstet Gynecol Scand.* 2021. doi:  
58  
59  
60

- 1  
2  
3  
4  
5  
6 621 10.1111/aogs.14282.  
7  
8  
9 622 49. Rogerson SJ, Desai M, Mayor A, Sicuri E, Taylor SM, van Eijk AM. Burden,  
10  
11  
12 623 pathology, and costs of malaria in pregnancy: new developments for an old  
13  
14  
15 624 problem. *Lancet Infect Dis.* 2018;18:e107-e118. doi: 10.1016/s1473-  
16  
17  
18 625 3099(18)30066-5.  
19  
20  
21 626 50. Schlueter A, Doshi U, Garg B, Hersh AR, Caughey AB. Adverse pregnancy  
22  
23  
24 627 outcomes associated with maternal syphilis infection. *J Matern Fetal Neonatal*  
25  
26  
27 628 *Med.* 2021;1-6. doi: 10.1080/14767058.2021.1895740.  
28  
29  
30 629 51. Orazulike N, Sharma JB, Sharma S, Umeora OIJ. Tuberculosis (TB) in  
31  
32  
33 630 pregnancy—a review. *Eur J Obstet Gynecol Reprod Biol.* 2021;259:167-177. doi:  
34  
35  
36 631 10.1016/j.ejogrb.2021.02.016.  
37  
38  
39 632 52. Bezerra HS, Alves RM, Nunes ADD, Barbosa IR. Prevalence and associated  
40  
41  
42 633 factors of common mental disorders in women: A systematic review. *Public*  
43  
44  
45 634 *Health Rev.* 2021;42:1604234. doi: 10.3389/phrs.2021.1604234.  
46  
47  
48 635 53. Niemi M, Falkenberg T, Petzold M, Chuc NT, Patel V. Symptoms of antenatal  
49  
50  
51 636 common mental disorders, preterm birth and low birthweight: a prospective cohort  
52  
53  
54 637 study in a semi-rural district of Vietnam. *Trop Med Int Health.* 2013;18:687-695.  
55  
56  
57 638 doi: 10.1111/tmi.12101.  
58  
59  
60

- 1  
2  
3  
4  
5  
6 639 54. Urquia ML, O'Campo PJ, Heaman MI, Janssen PA, Thiessen KR. Experiences of  
7  
8  
9 640 violence before and during pregnancy and adverse pregnancy outcomes: an  
10  
11  
12 641 analysis of the Canadian Maternity Experiences Survey. *BMC Pregnancy*  
13  
14  
15 642 *Childbirth*. 2011;11:42. doi: 10.1186/1471-2393-11-42.
- 16  
17  
18 643 55. Shaw GM, Wise PH, Mayo J, Carmichael SL, Ley C, Lyell DJ, et al. Maternal  
19  
20  
21 644 prepregnancy body mass index and risk of spontaneous preterm birth. *Paediatr*  
22  
23  
24 645 *Perinat Epidemiol*. 2014;28:302-11. doi: 10.1111/ppe.12125.
- 25  
26  
27 646 56. Paré E, Parry S, McElrath TF, Pucci D, Newton A, Lim KH. Clinical risk factors  
28  
29  
30 647 for preeclampsia in the 21st century. *Obstet Gynecol*. 2014;124:763-70. doi:  
31  
32  
33 648 10.1097/aog.0000000000000451.
- 34  
35  
36 649 57. Goldenberg RL, Culhane JF, Iams JD, Romero R. Epidemiology and causes of  
37  
38  
39 650 preterm birth. *Lancet*. 2008;371:75-84. doi: 10.1016/s0140-6736(08)60074-4.
- 40  
41  
42 651  
43  
44  
45  
46  
47  
48  
49  
50  
51  
52  
53  
54  
55  
56  
57  
58  
59  
60

1  
2  
3  
4  
5  
6 652 **Figure legends**  
7

8  
9 653 Figure 1. Flow diagram of the study participants.  
10  
11  
12  
13  
14  
15  
16  
17  
18  
19  
20  
21  
22  
23  
24  
25  
26  
27  
28  
29  
30  
31  
32  
33  
34  
35  
36  
37  
38  
39  
40  
41  
42  
43  
44  
45  
46  
47  
48  
49  
50  
51  
52  
53  
54  
55  
56  
57  
58  
59  
60

For peer review only

654 **Table 1. Main maternal characteristics (n = 86,885)**

| Characteristics                         | The number of chronic conditions |                     |                     |                     |
|-----------------------------------------|----------------------------------|---------------------|---------------------|---------------------|
|                                         | Total                            | 0 (n =<br>51,964)   | 1 (n =<br>29,459)   | ≥2 (n =<br>5,462)   |
| Maternal age<br>(years)                 |                                  |                     |                     |                     |
| ≤ 24                                    | 8,599 (9.9)                      | 4,451 (8.6)         | 3,342 (11.3)        | 806 (14.8)          |
| 25-29                                   | 23,873 (27.5)                    | 14,205 (27.3)       | 8,232 (27.9)        | 1,436 (26.3)        |
| 30-34                                   | 30,686 (35.3)                    | 18,776 (36.1)       | 10,142 (34.4)       | 1,768 (32.4)        |
| 35-39                                   | 19,703 (22.7)                    | 12,121 (23.3)       | 6,381 (21.7)        | 1,201 (22.0)        |
| ≥ 40                                    | 4,018 (4.6)                      | 2,409 (4.6)         | 1,359 (4.6)         | 250 (4.6)           |
| Missing                                 | 6 (0.01)                         | 2 (0.00)            | 3 (0.01)            | 1 (0.02)            |
| Body mass<br>index (kg/m <sup>2</sup> ) | 20.5<br>(13.2–52.8)              | 20.7<br>(18.5–24.9) | 20.0<br>(13.2–48.8) | 19.5<br>(13.3–52.8) |
| Parity                                  |                                  |                     |                     |                     |
| 0                                       | 35,973 (41.4)                    | 21,952 (42.2)       | 11,972 (40.6)       | 2,049 (37.5)        |
| 1                                       | 31,810 (36.6)                    | 19,030 (36.6)       | 10,750 (36.5)       | 2,030 (37.2)        |
| ≥ 2                                     | 17,040 (19.6)                    | 9,691 (18.7)        | 6,059 (20.6)        | 1,290 (23.6)        |
| Missing                                 | 2,062 (2.4)                      | 1,291 (2.5)         | 678 (2.3)           | 93 (1.7)            |
| Smoking during<br>pregnancy             |                                  |                     |                     |                     |
| No                                      | 49,414 (56.9)                    | 31,028 (59.7)       | 15,937 (54.1)       | 2,449 (44.8)        |
| Quit before                             | 20,152 (23.2)                    | 12,094 (23.3)       | 6,777 (23.0)        | 1,281 (23.5)        |

|                           |               |               |               |              |
|---------------------------|---------------|---------------|---------------|--------------|
| pregnancy                 |               |               |               |              |
| Quit after pregnancy      | 12,042 (13.9) | 6,320 (12.2)  | 4,613 (15.7)  | 1,109 (20.3) |
| Yes                       | 3,859 (4.4)   | 1,757 (3.4)   | 1,604 (5.4)   | 498 (9.1)    |
| Missing                   | 1,418 (1.6)   | 765 (1.5)     | 528 (1.8)     | 125 (2.3)    |
| Drinking during pregnancy |               |               |               |              |
| No                        | 28,652 (33.0) | 16,928 (32.6) | 9,957 (33.8)  | 1,767 (32.4) |
| Quit before pregnancy     | 14,108 (16.2) | 8,321 (16.0)  | 4,832 (16.4)  | 955 (17.5)   |
| Quit after pregnancy      | 40,354 (46.5) | 24,554 (47.3) | 13,378 (45.4) | 2,422 (44.3) |
| Yes                       | 2,370 (2.7)   | 1,386 (2.7)   | 771 (2.6)     | 213 (3.9)    |
| Missing                   | 1,401 (1.6)   | 775 (1.5)     | 521 (1.8)     | 105 (1.9)    |

655 Values are presented as n (%) or median (range: min–max)

656 **Table 2. Perinatal characteristics (n = 86,885)**

| Outcomes                                   | Total                 | The number of chronic conditions |                       |                       |
|--------------------------------------------|-----------------------|----------------------------------|-----------------------|-----------------------|
|                                            |                       | 0 (n =<br>51,964)                | 1 (n =<br>29,459)     | ≥2 (n =<br>5,462)     |
| Gestational age at delivery (weeks)        | 39 (22–43)            | 39 (23–42)                       | 39 (22–42)            | 39 (23–43)            |
| Birth weight (grams)                       | 3,028 (312–<br>5,214) | 3,038 (312–<br>4,700)            | 3,016 (350–<br>5,214) | 2,998 (398–<br>4,568) |
| Neonatal sex                               |                       |                                  |                       |                       |
| Male                                       | 44,628 (51.4)         | 26,577<br>(51.2)                 | 15,225<br>(51.7)      | 2,826 (51.7)          |
| Female                                     | 42,252 (48.6)         | 25,385<br>(48.8)                 | 14,233<br>(48.3)      | 2,634 (48.2)          |
| Missing                                    | 5 (0.01)              | 2 (0.00)                         | 1 (0.00)              | 2 (0.04)              |
| Preterm birth (< 37 weeks' gestation)      | 3,963 (4.6)           | 2,125 (4.1)                      | 1,498 (5.1)           | 340 (6.2)             |
| Very preterm birth (< 34 weeks' gestation) | 834 (1.0)             | 441 (0.98)                       | 328 (1.1)             | 65 (1.2)              |
| Low birth weight (< 2,500 g)               | 7,013 (8.1)           | 3,775 (7.3)                      | 2,661 (9.0)           | 577 (10.6)            |
| Very low birth weight (< 1,500 g)          | 483 (0.6)             | 248 (0.5)                        | 193 (0.7)             | 42 (0.8)              |

|                                        |               |               |               |              |
|----------------------------------------|---------------|---------------|---------------|--------------|
| Extremely low birth weight (< 1,000 g) | 205 (0.2)     | 108 (0.2)     | 76 (0.3)      | 21 (0.4)     |
| Small for gestational age              |               |               |               |              |
| No                                     | 78,138 (89.9) | 46,975 (90.4) | 26,322 (89.4) | 4,841 (88.6) |
| Yes                                    | 6,474 (7.5)   | 3,574 (6.9)   | 2,388 (8.1)   | 512 (9.4)    |
| Missing                                | 2,273 (2.6)   | 1,415 (2.7)   | 749 (2.5)     | 109 (2.0)    |

657 Values are presented as n (%) or median (range: min–max).



658 **Table 3. Prevalence of 23 maternal chronic conditions (n = 86,885)**

| Condition                                   | n (%)         |
|---------------------------------------------|---------------|
| Abnormal pre-pregnancy BMI                  |               |
| Underweight (BMI < 18.5 kg/m <sup>2</sup> ) | 13,533 (15.6) |
| Obesity (BMI ≥ 25.0 kg/m <sup>2</sup> )     | 9,461 (10.9)  |
| Allergic disease                            | 2,680 (3.1)   |
| Anemia                                      | 628 (0.7)     |
| Diabetes mellitus                           | 128 (0.2)     |
| Domestic violence                           | 11,261 (13.0) |
| Dyslipidemia                                | 6 (0.01)      |
| Epilepsy                                    | 133 (0.2)     |
| Gastric or duodenal ulcer                   | 298 (0.3)     |
| Heart disease                               | 7 (0.01)      |
| Hepatitis                                   | 5 (0.01)      |
| Human immunodeficiency virus infection      | 7 (0.01)      |
| Hypertension                                | 96 (0.1)      |
| Inflammatory bowel disease                  | 16 (0.02)     |
| Kidney disease                              | 17 (0.02)     |
| Malignancy                                  | 0 (0)         |
| Migraine                                    | 44 (0.1)      |
| Neurologic disease                          | 0 (0)         |
| Other sexually transmitted disease          | 1,193 (1.4)   |
| Psychiatric disorder                        | 604 (0.7)     |

|                               |           |
|-------------------------------|-----------|
| Rheumatic or collagen disease | 94 (0.1)  |
| Substance abuse               | 1 (0.0)   |
| Thyroid disease               | 638 (0.7) |

659 BMI, body mass index.

For peer review only

660 **Table 4. Crude and adjusted odds ratios of maternal chronic conditions for**  
 661 **adverse perinatal outcomes (n = 86,885)**

| Outcome              | The number of chronic conditions |                         |                         |
|----------------------|----------------------------------|-------------------------|-------------------------|
|                      | 0                                | 1                       | $\geq 2$                |
| <b>PTB</b>           |                                  |                         |                         |
| N (%)                | 2,125 (4.1)                      | 1,498 (5.1)             | 340 (6.2)               |
| Crude OR (95% CI)    | reference                        | 1.26 (1.17-1.34)        | 1.56 (1.38-1.75)        |
| Adjusted OR (95% CI) | reference                        | <b>1.24 (1.16-1.33)</b> | <b>1.50 (1.33-1.69)</b> |
| <b>VPTB</b>          |                                  |                         |                         |
| N (%)                | 441 (0.9)                        | 328 (1.1)               | 65 (1.2)                |
| Crude OR (95% CI)    | reference                        | 1.32 (1.14-1.52)        | 1.41 (1.08-1.83)        |
| Adjusted OR (95% CI) | reference                        | <b>1.29 (1.12-1.49)</b> | <b>1.34 (1.03-1.74)</b> |
| <b>LBW</b>           |                                  |                         |                         |
| N (%)                | 3,775 (7.3)                      | 2,661 (9.0)             | 577 (10.6)              |
| Crude OR (95% CI)    | reference                        | 1.27 (1.20-1.33)        | 1.51 (1.37-1.65)        |
| Adjusted OR (95% CI) | reference                        | <b>1.27 (1.20-1.34)</b> | <b>1.49 (1.35-1.63)</b> |
| <b>VLBW</b>          |                                  |                         |                         |
| N (%)                | 248 (0.5)                        | 193 (0.7)               | 42 (0.8)                |
| Crude OR (95% CI)    | reference                        | 1.38 (1.14-1.66)        | 1.61 (1.16-2.24)        |
| Adjusted OR (95% CI) | reference                        | <b>1.39 (1.15-1.67)</b> | <b>1.62 (1.16-2.25)</b> |
| <b>ELBW</b>          |                                  |                         |                         |
| N (%)                | 108 (0.2)                        | 76 (0.3)                | 21 (0.4)                |

|                      |             |                         |                         |
|----------------------|-------------|-------------------------|-------------------------|
| Crude OR (95% CI)    | reference   | 1.24 (0.93-1.67)        | 1.85 (1.16-2.96)        |
| Adjusted OR (95% CI) | reference   | 1.24 (0.92-1.67)        | <b>1.81 (1.12-2.90)</b> |
| <b>SGA†</b>          |             |                         |                         |
| N (%)                | 3,685 (7.1) | 2,443 (8.3)             | 522 (9.6)               |
| Crude OR (95% CI)    | reference   | 1.18 (1.12-1.25)        | 1.39 (1.26-1.52)        |
| Adjusted OR (95% CI) | reference   | <b>1.17 (1.11-1.23)</b> | <b>1.33 (1.20-1.46)</b> |

662 †The total number of participants was 86,674. Adjusted odds ratios with statistical  
 663 significance are indicated in bold font.

664 CI, confidence interval; ELBW, extremely low birth weight (< 1,000 g); LBW, low birth  
 665 weight (< 2,500 g); OR, odds ratio compared to that of infants of mothers without chronic  
 666 conditions, adjusted for maternal age at delivery, parity (except for SGA analysis),  
 667 maternal smoking status, maternal alcohol consumption, maternal educational  
 668 background, and neonatal sex (except for SGA analysis); PTB, preterm birth before 37  
 669 weeks of gestation; SGA, small for gestational age; VLBW, very low birth weight (<  
 670 1,500 g); VPTB, preterm birth before 34 weeks of gestation.

All fetal records (n = 104,062)

Exclusion (n = 3,759)  
- Miscarriage (n = 1,254)  
- Stillbirth (n = 382)  
- Unknown birth outcome (n = 2,123)

n = 100,303

Exclusion (n = 5,550)  
- Second or later participation

n = 94,753

Exclusion (n = 7,868)  
- Multiple pregnancies (n = 1,809)  
- Pregnancies with chromosomal abnormality (n = 207)  
- Missing value of gestational age at delivery (n = 286)  
- Missing value of birth weight (n = 69)  
- Missing value of drug use information (n = 2,166)  
- Missing value of domestic violence from partner (n = 880)  
- Missing value of maternal infection (n = 2,418)  
- Missing value of maternal body mass index (n = 33)

Participants in the present study (n = 86,885)

Analyzed participants (n = 86,885)  
- Preterm birth <37 weeks' gestation  
- Preterm birth <34 weeks' gestation  
- Low birth weight  
- Very low birth weight  
- Extremely low birth weight

Exclusion (n = 211)  
- Gestational age >41 weeks (n = 214)

Analyzed participants (n = 86,674)  
- Small for gestational age infant

## Supplementary Appendix 1. Recruitment strategies in the Japan Environment and Children's Study

We attempted to contact as many expected mothers living in study areas as possible. The recruitment rate was targeted more than 50% of all eligible mothers. Either or both of the following two recruitment protocols were applied: 1) recruitment at cooperating health care providers, such as obstetric facilities, at the time of the first prenatal examination (provider-mediated community-based recruitment); 2) recruitment at local government offices issuing pregnancy journals, namely Mother-Child Health Handbooks (the Mother-Child Health Handbook was an official booklet provided complimentary to all expecting mothers in Japan when they became pregnant to receive municipal services for pregnancy, delivery, and childcare). Written informed consent for participation in the study was obtained from individual mothers and their partners, and for children, from their parents or guardian. The study participants were free to withdraw at any moment. Women who refused their consent to study protocol and those who were unreachable during pregnancy, were excluded. In Japan, expecting mothers usually return to their parents' homes to give birth. Those who planned to return to their parents' homes were not eligible unless they were near one of the regional centers. Though we carefully planned the sampling, the recruitment was not entirely random. Both health care providers and local government facilities participated in the recruitment activities. We made every effort to reach out to as many eligible women in the study areas as possible. The representativeness of the JECS samples would be evaluated when the birth data were fixed. (Reference No. 30: Kawamoto T, et al. Rationale and study design of the Japan environment and children's study (JECS). BMC Public Health. 2014;14:25.)

1  
2  
3 **Supplementary Appendix 2. Medication list in the Japan Environment and Children's**  
4 **Study (Nishigori H, et al. Drug use before and during pregnancy in Japan: the Japan**  
5 **environment and children's study. Pharmacy (Basel). 2017;5.)**  
6  
7  
8  
9

10  
11  
12 **Antibacterial, Antiviral, Antifungal, Carcinostatic drugs**  
13

14  
15 0 Antimicrobial

16  
17 1 Antiviral

18  
19 2 Antifungal

20  
21 3 Carcinostatic  
22  
23

24 **Corticosteroids**  
25

26 4 Corticosteroids: oral administration, inhalation, infusion  
27

28 5 Corticosteroids: external use, enema  
29  
30

31 **Antipyretic, Analgesic drugs**  
32

33 6 Antipyretic, Analgesic, Medicine for common cold: prescription  
34

35 7 Antipyretic, Analgesic, Medicine for common cold: over the counter  
36

37 8 Poultice which the analgesic is included in  
38  
39

40 **Antirheumatic drugs**  
41

42 9 Immunosuppressant, Immunoregulation  
43

44 10 Infliximab, Etanercept  
45

46 11 Antirheumatic drug unidentified in detail  
47  
48

49 **Antiallergy drugs**  
50

51 12 Antiallergic drug (oral administration, inhalation, nasal drip, tape, Antihistaminic)  
52  
53

54 **Respiratory drugs**  
55

56 13  $\beta$  stimulative (oral administration, inhalation)  
57

58 14 Nontypeable inhalant  
59  
60

1  
2  
3 15 Antitussive, Expectorant  
4

5 16 Theophylline  
6

7  
8 17 Other respiratory drug  
9

10 **Antidiabetic drugs, Antihyperlipidemic drugs**  
11

12 21 Insulin preparation  
13

14 22 Hypoglycemic tablet  
15

16 23 Antihyperlipidemic  
17

18 24 Antigout  
19  
20

21 **Hormone-related drugs**  
22

23 25 Thyroid hormone preparation/levothyroxine sodium  
24

25 26 Antithyroid/Thiamazole  
26

27 27 Other hormone drugs  
28  
29

30 **Blood-related drugs**  
31

32 28 Iron preparation  
33

34 29 Other blood-related  
35  
36

37 **Cardiovascular drugs**  
38

39 31 Antihypertensive (including diuretic)  
40

41 32 Pressor  
42

43 33 Antiarrhythmic, Antianginal  
44

45 34 Heart failure therapeutic  
46

47 35 Other cardiovascular drugs  
48  
49  
50

51 **Gastrointestinal drugs**  
52

53 36 Antiulcer (Proton pump inhibitor, H2 blocker)  
54

55 37 General gastrointestinal agents  
56

57 38 Other gastrointestinal agents  
58  
59  
60



**Psychoactive drugs**

- 41 Selective serotonin reuptake inhibitors (SSRI)
- 42 Antidepressant drug except the SSRI
- 43 Antianxiety
- 44 Sleeping pill
- 45 Antipsychotic
- 46 Valproic acid
- 47 Antiepileptic except the above
- 48 Lithium carbonate
- 49 Other psychoactive drugs

**Perinatal drugs**

- 51 Utero relaxants
- 52 Utero-tonic
- 53 Ovulation inducing
- 54 Other perinatal related drugs

**Other drugs**

- 61 Anesthetic, pain block injection
- 62 Chinese herbal medicines
- 63 External application (non-identified contents)
- 64 Injection, Drip infusion (non-identified contents)
- 65 Bone and Calcium metabolism
- 66 Antimigraine headache
- 67 Muscle relaxant
- 68 Antiemetic drug
- 69 AntiParkinson

1  
2  
3 70 Hemorrhoids  
4

5 **Supplements, vitamins/minerals**  
6

7  
8 71 Vitamin A  
9

10 72 Vitamin B  
11

12 73 Vitamin C  
13

14 74 Vitamin D  
15

16 75 Vitamin E  
17

18 76 Folic acid  
19

20 77 Minerals  
21

22 78 Multi vitamins supplement  
23

24 79 Total supplement  
25

26  
27  
28 **Illegal drugs**  
29

30 80 Marijuana  
31

32 81 Psychostimulant  
33

34 82 Ecstasy  
35

36 83 Thinner  
37

38 84 Toluene  
39

40 85 Other illegal drugs  
41

42  
43  
44 **90 Vaccines**  
45

46 **98 Drugs not included in the list mentioned above**  
47

48  
49 **99 Forgot the drug name**  
50  
51  
52  
53  
54  
55  
56  
57  
58  
59  
60

**Supplementary Table 1. All maternal characteristics (n = 86,885)**

| Characteristics                         | The number of chronic conditions |                      |                      |                         |
|-----------------------------------------|----------------------------------|----------------------|----------------------|-------------------------|
|                                         | Total                            | 0 (n =<br>51,964)    | 1 (n =<br>29,459)    | $\geq 2$ (n =<br>5,462) |
| Maternal age<br>(years)                 |                                  |                      |                      |                         |
| $\leq 24$                               | 8,599 (9.9)                      | 4,451 (8.6)          | 3,342 (11.3)         | 806 (14.8)              |
| 25-29                                   | 23,873 (27.5)                    | 14,205 (27.3)        | 8,232 (27.9)         | 1,436 (26.3)            |
| 30-34                                   | 30,686 (35.3)                    | 18,776 (36.1)        | 10,142 (34.4)        | 1,768 (32.4)            |
| 35-39                                   | 19,703 (22.7)                    | 12,121 (23.3)        | 6,381 (21.7)         | 1,201 (22.0)            |
| $\geq 40$                               | 4,018 (4.6)                      | 2,409 (4.6)          | 1,359 (4.6)          | 250 (4.6)               |
| Missing                                 | 6 (0.01)                         | 2 (0.00)             | 3 (0.01)             | 1 (0.02)                |
| Body mass<br>index (kg/m <sup>2</sup> ) | 20.5<br>(13.2–52.8)              | 20.7 (18.5–<br>24.9) | 20.0 (13.2–<br>48.8) | 19.5 (13.3–<br>52.8)    |
| Parity                                  |                                  |                      |                      |                         |
| 0                                       | 35,973 (41.4)                    | 21,952 (42.2)        | 11,972 (40.6)        | 2,049 (37.5)            |
| 1                                       | 31,810 (36.6)                    | 19,030 (36.6)        | 10,750 (36.5)        | 2,030 (37.2)            |
| $\geq 2$                                | 17,040 (19.6)                    | 9,691 (18.7)         | 6,059 (20.6)         | 1,290 (23.6)            |
| Missing                                 | 2,062 (2.4)                      | 1,291 (2.5)          | 678 (2.3)            | 93 (1.7)                |
| Smoking<br>during<br>pregnancy          |                                  |                      |                      |                         |
| No                                      | 49,414 (56.9)                    | 31,028 (59.7)        | 15,937 (54.1)        | 2,449 (44.8)            |

|                                 |               |               |               |              |
|---------------------------------|---------------|---------------|---------------|--------------|
| Quit before pregnancy           | 20,152 (23.2) | 12,094 (23.3) | 6,777 (23.0)  | 1,281 (23.5) |
| Quit after pregnancy            | 12,042 (13.9) | 6,320 (12.2)  | 4,613 (15.7)  | 1,109 (20.3) |
| Yes                             | 3,859 (4.4)   | 1,757 (3.4)   | 1,604 (5.4)   | 498 (9.1)    |
| Missing                         | 1,418 (1.6)   | 765 (1.5)     | 528 (1.8)     | 125 (2.3)    |
| Drinking during pregnancy       |               |               |               |              |
| No                              | 28,652 (33.0) | 16,928 (32.6) | 9,957 (33.8)  | 1,767 (32.4) |
| Quit before pregnancy           | 14,108 (16.2) | 8,321 (16.0)  | 4,832 (16.4)  | 955 (17.5)   |
| Quit after pregnancy            | 40,354 (46.5) | 24,554 (47.3) | 13,378 (45.4) | 2,422 (44.3) |
| Yes                             | 2,370 (2.7)   | 1,386 (2.7)   | 771 (2.6)     | 213 (3.9)    |
| Missing                         | 1,401 (1.6)   | 775 (1.5)     | 521 (1.8)     | 105 (1.9)    |
| Maternal educational background |               |               |               |              |
| Junior high school              | 4,089 (4.7)   | 1,814 (3.5)   | 1,730 (5.9)   | 545 (10.0)   |
| High school                     | 27,106 (31.2) | 15,266 (29.4) | 9,738 (33.1)  | 2,102 (38.5) |
| Technical junior college or     | 36,123 (41.6) | 22,182 (42.7) | 11,949 (40.6) | 1,992 (36.5) |

|                                     |               |               |              |              |
|-------------------------------------|---------------|---------------|--------------|--------------|
| technical/<br>vocational<br>college |               |               |              |              |
| University or<br>above              | 18,415 (21.2) | 12,062 (23.2) | 5,626 (19.1) | 727 (13.3)   |
| Missing                             | 1,152 (1.3)   | 640 (1.2)     | 416 (1.4)    | 96 (1.8)     |
| Household<br>income (JPY)           |               |               |              |              |
| < 2,000,000                         | 4,538 (5.2)   | 2,176 (4.2)   | 1,838 (6.2)  | 524 (9.6)    |
| 2,000,000–<br>3,990,000             | 27,625 (31.8) | 15,817 (30.4) | 9,815 (33.3) | 1,993 (36.5) |
| 4,000,000–<br>5,990,000             | 26,440 (30.4) | 16,369 (31.5) | 8,587 (29.2) | 1,484 (27.2) |
| 6,000,000–<br>7,990,000             | 12,757 (14.7) | 8,188 (15.8)  | 4,019 (13.6) | 550 (10.1)   |
| 8,000,000–<br>9,990,000             | 5,298 (6.1)   | 3,384 (6.5)   | 1,675 (5.7)  | 239 (4.4)    |
| ≥ 10,000,000                        | 3,400 (3.9)   | 2,174 (4.2)   | 1,043 (3.5)  | 183 (3.4)    |
| Missing                             | 6,827 (7.9)   | 3,856 (7.4)   | 2,482 (8.4)  | 489 (9.0)    |

Values are presented as n (%) or median (range: min–max)

**Supplementary Table 2. Crude and adjusted odds ratios of maternal chronic conditions for adverse perinatal outcomes in the complete dataset (n = 76,931)**

| Outcome              | The number of chronic conditions |                         |                         |
|----------------------|----------------------------------|-------------------------|-------------------------|
|                      | 0                                | 1                       | $\geq 2$                |
| <b>PTB</b>           |                                  |                         |                         |
| N (%)                | 1,838 (4.0)                      | 1,253 (4.8)             | 290 (6.0)               |
| Crude OR (95% CI)    | reference                        | 1.23 (1.14-1.32)        | 1.55 (1.37-1.77)        |
| Adjusted OR (95% CI) | reference                        | <b>1.21 (1.13-1.31)</b> | <b>1.49 (1.31-1.70)</b> |
| <b>VPTB</b>          |                                  |                         |                         |
| N (%)                | 354 (0.8)                        | 259 (1.0)               | 48 (1.0)                |
| Crude OR (95% CI)    | reference                        | 1.31 (1.11-1.54)        | 1.31 (0.97-1.77)        |
| Adjusted OR (95% CI) | reference                        | <b>1.28 (1.09-1.50)</b> | 1.23 (0.91-1.67)        |
| <b>LBW</b>           |                                  |                         |                         |
| N (%)                | 3,307 (7.2)                      | 2,247 (8.7)             | 491 (10.2)              |
| Crude OR (95% CI)    | reference                        | 1.23 (1.17-1.30)        | 1.48 (1.34-1.64)        |
| Adjusted OR (95% CI) | reference                        | <b>1.23 (1.16-1.30)</b> | <b>1.45 (1.31-1.61)</b> |
| <b>VLBW</b>          |                                  |                         |                         |
| N (%)                | 193 (0.4)                        | 141 (0.5)               | 29 (0.6)                |
| Crude OR (95% CI)    | reference                        | 1.31 (1.05-1.62)        | 1.45 (0.98-2.15)        |
| Adjusted OR (95% CI) | reference                        | <b>1.30 (1.04-1.61)</b> | 1.41 (0.95-2.10)        |
| <b>ELBW</b>          |                                  |                         |                         |
| N (%)                | 71 (0.2)                         | 43 (0.2)                | 13 (0.3)                |
| Crude OR (95% CI)    | reference                        | 1.08 (0.74-1.58)        | 1.77 (0.98-3.19)        |
| Adjusted OR (95% CI) | reference                        | 1.06 (0.72-1.55)        | 1.61 (0.89-2.95)        |

|                      |             |                         |                         |
|----------------------|-------------|-------------------------|-------------------------|
| <b>SGA†</b>          |             |                         |                         |
| N (%)                | 3,249 (7.0) | 2,100 (8.1)             | 455 (9.5)               |
| Crude OR (95% CI)    | reference   | 1.17 (1.10-1.24)        | 1.39 (1.25-1.54)        |
| Adjusted OR (95% CI) | reference   | <b>1.15 (1.09-1.22)</b> | <b>1.33 (1.20-1.47)</b> |

†The total number of participants was 76,740. Adjusted odds ratios with statistical significance are indicated in bold font.

CI, confidence interval; ELBW, extremely low birth weight (< 1,000 g); LBW, low birth weight (< 2,500 g); OR, odds ratio compared to that of infants of mothers without chronic conditions, adjusted for maternal age at delivery, parity (except for SGA analysis), maternal smoking status, maternal alcohol consumption, maternal educational background, and neonatal sex (except for SGA analysis); PTB, preterm birth before 37 weeks of gestation; SGA, small for gestational age; VLBW, very low birth weight (< 1,500 g); VPTB, preterm birth before 34 weeks of gestation.

**Supplementary Table 3. Adverse perinatal outcomes in maternal multimorbidity categorized in detail (n = 86,885)**

| Outcome              | The number of chronic conditions |                         |                         |                         |                  | <i>P</i> value for trend |
|----------------------|----------------------------------|-------------------------|-------------------------|-------------------------|------------------|--------------------------|
|                      | 0<br>(n =<br>51,964)             | 1<br>(n = 29,459)       | 2<br>(n = 5,039)        | 3<br>(n = 385)          | ≥4<br>(n = 38)   |                          |
| <b>PTB</b>           |                                  |                         |                         |                         |                  |                          |
| N (%)                | 2,125 (4.1)                      | 1,498 (5.1)             | 301 (6.0)               | 36 (9.4)                | 3 (7.9)          |                          |
| Crude OR (95% CI)    | reference                        | 1.26 (1.17-1.34)        | 1.49 (1.32-1.69)        | 2.42 (1.71-3.42)        | 2.01 (0.62-6.54) |                          |
| Adjusted OR (95% CI) | reference                        | <b>1.24 (1.16-1.33)</b> | <b>1.44 (1.27-1.64)</b> | <b>2.30 (1.62-3.26)</b> | 1.72 (0.53-5.62) | < 0.001                  |
| <b>LBW</b>           |                                  |                         |                         |                         |                  |                          |
| N (%)                | 3,775 (7.3)                      | 2,661 (9.0)             | 525 (10.4)              | 46 (12.0)               | 6 (15.8)         |                          |
| Crude OR (95% CI)    | reference                        | 1.27 (1.20-1.33)        | 1.48 (1.35-1.63)        | 1.73 (1.27-2.36)        | 2.39 (1.00-5.73) |                          |
| Adjusted OR (95% CI) | reference                        | <b>1.26 (1.20-1.34)</b> | <b>1.47 (1.33-1.62)</b> | <b>1.66 (1.22-2.27)</b> | 2.09 (0.86-5.05) | < 0.001                  |
| <b>SGA†</b>          |                                  |                         |                         |                         |                  |                          |
| N (%)                | 3,685 (7.1)                      | 2,443 (8.3)             | 483 (9.6)               | 33 (8.6)                | 6 (15.8)         |                          |
| Crude OR (95% CI)    | reference                        | 1.18 (1.12-1.25)        | 1.39 (1.26-1.54)        | 1.23 (0.86-1.76)        | 2.45 (1.02-5.86) |                          |



|                      |           |                         |                         |                  |                  |         |
|----------------------|-----------|-------------------------|-------------------------|------------------|------------------|---------|
| Adjusted OR (95% CI) | reference | <b>1.17 (1.10-1.23)</b> | <b>1.33 (1.21-1.48)</b> | 1.14 (0.80-1.63) | 2.19 (0.91-5.27) | < 0.001 |
|----------------------|-----------|-------------------------|-------------------------|------------------|------------------|---------|

†The total number of participants was 86,674. Adjusted odds ratios with statistical significance are indicated in bold font.

CI, confidence interval; LBW, low birth weight (< 2,500 g); OR, odds ratio compared to that of infants of mothers without chronic conditions, adjusted for maternal age at delivery, parity (except for SGA analysis), maternal smoking status, maternal alcohol consumption, maternal educational background, and neonatal sex (except for SGA analysis); PTB, preterm birth before 37 weeks of gestation; SGA, small for gestational age.

For peer review only

1  
2  
3  
4  
5  
6  
7  
8  
9  
10  
11  
12  
13  
14  
15  
16  
17  
18  
19  
20  
21  
22  
23  
24  
25  
26  
27  
28  
29  
30  
31  
32  
33  
34  
35  
36  
37  
38  
39  
40  
41  
42  
43  
44  
45  
46

**Supplementary Table 4A. Adjusted odds ratios of multimorbidity with underweight for adverse perinatal outcomes (n = 86,885)**

| Outcome              | The number of chronic conditions |                         |                         |                         |
|----------------------|----------------------------------|-------------------------|-------------------------|-------------------------|
|                      | 0                                | 1                       | ≥2 without underweight  | ≥2 with underweight     |
| <b>PTB</b>           |                                  |                         |                         |                         |
| N (%)                | 2,125<br>(4.1)                   | 1,498 (5.1)             | 207 (7.1)               | 133 (5.2)               |
| Adjusted OR (95% CI) | reference                        | <b>1.24 (1.16-1.33)</b> | <b>1.69 (1.46-1.96)</b> | <b>1.28 (1.07-1.54)</b> |
| <b>VPTB</b>          |                                  |                         |                         |                         |
| N (%)                | 441 (0.9)                        | 328 (1.1)               | 44 (1.5)                | 21 (0.8)                |
| Adjusted OR (95% CI) | reference                        | <b>1.29 (1.12-1.49)</b> | <b>1.64 (1.20-2.25)</b> | 0.97 (0.62-1.50)        |
| <b>LBW</b>           |                                  |                         |                         |                         |
| N (%)                | 3,775<br>(7.3)                   | 2,661 (9.0)             | 266 (9.1)               | 311 (12.2)              |
| Adjusted OR (95% CI) | reference                        | <b>1.27 (1.20-1.33)</b> | <b>1.25 (1.09-1.42)</b> | <b>1.78 (1.57-2.01)</b> |
| <b>VLBW</b>          |                                  |                         |                         |                         |
| N (%)                | 248 (0.5)                        | 193 (0.7)               | 27 (0.9)                | 15 (0.6)                |
| Adjusted OR (95% CI) | reference                        | <b>1.39 (1.15-1.67)</b> | <b>1.89 (1.27-2.84)</b> | 1.28 (0.76-2.16)        |
| <b>ELBW</b>          |                                  |                         |                         |                         |

|                      |             |                         |                         |                         |
|----------------------|-------------|-------------------------|-------------------------|-------------------------|
| N (%)                | 108 (0.2)   | 76 (0.3)                | 13 (0.5)                | 8 (0.3)                 |
| Adjusted OR (95% CI) | reference   | 1.24 (0.92-1.67)        | <b>2.03 (1.13-3.63)</b> | 1.54 (0.75-3.12)        |
| <b>SGA†</b>          |             |                         |                         |                         |
| N (%)                | 3,685 (7.1) | 2,443 (8.3)             | 205 (7.1)               | 317 (12.5)              |
| Adjusted OR (95% CI) | reference   | <b>1.17 (1.10-1.23)</b> | 0.94 (0.81-1.09)        | <b>1.80 (1.59-2.04)</b> |

†The total number of participants was 86,674. Adjusted odds ratios with statistical

significance are indicated in bold font.

CI, confidence interval; ELBW, extremely low birth weight (< 1,000 g); LBW, low birth weight (< 2,500 g); OR, odds ratio compared to that of infants of mothers without chronic conditions, adjusted for maternal age at delivery, parity (except for SGA analysis), maternal smoking status, maternal alcohol consumption, maternal educational background, and neonatal sex (except for SGA analysis); PTB, preterm birth before 37 weeks of gestation; SGA, small for gestational age; VLBW, very low birth weight (< 1,500 g); VPTB, preterm birth before 34 weeks of gestation.

**Supplementary Table 4B. Adjusted odds ratios of multimorbidity with obesity for adverse perinatal outcomes (n = 86,885)**

| Outcome              | The number of chronic conditions |                         |                         |                         |
|----------------------|----------------------------------|-------------------------|-------------------------|-------------------------|
|                      | 0                                | 1                       | ≥2 without obesity      | ≥2 with obesity         |
| <b>PTB</b>           |                                  |                         |                         |                         |
| N (%)                | 2,125<br>(4.1)                   | 1,498 (5.1)             | 185 (5.4)               | 155 (7.5)               |
| Adjusted OR (95% CI) | reference                        | <b>1.24 (1.16-1.33)</b> | <b>1.33 (1.14-1.56)</b> | <b>1.78 (1.50-2.11)</b> |
| <b>VPTB</b>          |                                  |                         |                         |                         |
| N (%)                | 441 (0.9)                        | 328 (1.1)               | 28 (0.8)                | 37 (1.8)                |
| Adjusted OR (95% CI) | reference                        | <b>1.29 (1.12-1.49)</b> | 0.95 (0.65-1.40)        | <b>1.93 (1.37-2.72)</b> |
| <b>LBW</b>           |                                  |                         |                         |                         |
| N (%)                | 3,775<br>(7.3)                   | 2,661 (9.0)             | 383 (11.3)              | 194 (9.4)               |
| Adjusted OR (95% CI) | reference                        | <b>1.27 (1.20-1.34)</b> | <b>1.61 (1.44-1.80)</b> | <b>1.29 (1.10-1.50)</b> |
| <b>VLBW</b>          |                                  |                         |                         |                         |
| N (%)                | 248 (0.5)                        | 193 (0.7)               | 20 (0.6)                | 22 (1.1)                |
| Adjusted OR (95% CI) | reference                        | <b>1.39 (1.15-1.68)</b> | 1.27 (0.80-2.00)        | <b>2.16 (1.39-3.36)</b> |
| <b>ELBW</b>          |                                  |                         |                         |                         |

|                      |             |                         |                         |                         |
|----------------------|-------------|-------------------------|-------------------------|-------------------------|
| N (%)                | 108 (0.2)   | 76 (0.3)                | 9 (0.3)                 | 12 (0.6)                |
| Adjusted OR (95% CI) | reference   | 1.24 (0.92-1.67)        | 1.28 (0.64-2.53)        | <b>2.64 (1.44-4.83)</b> |
| <b>SGA†</b>          |             |                         |                         |                         |
| N (%)                | 3,685 (7.1) | 2,443 (8.3)             | 380 (11.2)              | 142 (6.9)               |
| Adjusted OR (95% CI) | reference   | <b>1.17 (1.10-1.23)</b> | <b>1.59 (1.42-1.78)</b> | 0.92 (0.77-1.09)        |

†The total number of participants was 86,674. Adjusted odds ratios with statistical

significance are indicated in bold font.

CI, confidence interval; ELBW, extremely low birth weight (< 1,000 g); LBW, low birth weight (< 2,500 g); OR, odds ratio compared to that of infants of mothers without chronic conditions, adjusted for maternal age at delivery, parity (except for SGA analysis), maternal smoking status, maternal alcohol consumption, maternal educational background, and neonatal sex (except for SGA analysis); PTB, preterm birth before 37 weeks of gestation; SGA, small for gestational age; VLBW, very low birth weight (< 1,500 g); VPTB, preterm birth before 34 weeks of gestation.

**Supplementary Table 4C. Adjusted odds ratios of multimorbidity with psychiatric disorder for adverse perinatal outcomes (n = 86,885)**

| Outcome              | The number of chronic conditions |                         |                                 |                              |
|----------------------|----------------------------------|-------------------------|---------------------------------|------------------------------|
|                      | 0                                | 1                       | ≥2 without psychiatric disorder | ≥2 with psychiatric disorder |
| <b>PTB</b>           |                                  |                         |                                 |                              |
| N (%)                | 2,125<br>(4.1)                   | 1,498 (5.1)             | 309 (6.1)                       | 31 (8.6)                     |
| Adjusted OR (95% CI) | reference                        | <b>1.24 (1.16-1.33)</b> | <b>1.47 (1.30-1.66)</b>         | <b>1.99 (1.36-2.89)</b>      |
| <b>VPTB</b>          |                                  |                         |                                 |                              |
| N (%)                | 441 (0.9)                        | 328 (1.1)               | 62 (1.2)                        | 3 (0.8)                      |
| Adjusted OR (95% CI) | reference                        | <b>1.29 (1.11-1.49)</b> | <b>1.38 (1.05-1.81)</b>         | 0.84 (0.27-2.63)             |
| <b>LBW</b>           |                                  |                         |                                 |                              |
| N (%)                | 3,775<br>(7.3)                   | 2,661 (9.0)             | 536 (10.5)                      | 41 (11.4)                    |
| Adjusted OR (95% CI) | reference                        | <b>1.27 (1.20-1.34)</b> | <b>1.49 (1.35-1.64)</b>         | <b>1.45 (1.04-2.02)</b>      |
| <b>VLBW</b>          |                                  |                         |                                 |                              |
| N (%)                | 248 (0.5)                        | 193 (0.7)               | 39 (0.8)                        | 3 (0.8)                      |
| Adjusted OR (95% CI) | reference                        | <b>1.39 (1.15-1.67)</b> | <b>1.62 (1.15-2.28)</b>         | 1.58 (0.50-4.96)             |

|                      |             |                         |                         |                  |
|----------------------|-------------|-------------------------|-------------------------|------------------|
| <b>ELBW</b>          |             |                         |                         |                  |
| N (%)                | 108 (0.2)   | 76 (0.3)                | 20 (0.4)                | 1 (0.3)          |
| Adjusted OR (95% CI) | reference   | 1.24 (0.92-1.67)        | <b>1.86 (1.15-3.02)</b> | 1.14 (0.16-8.25) |
| <b>SGA†</b>          |             |                         |                         |                  |
| N (%)                | 3,685 (7.1) | 2,443 (8.3)             | 492 (9.7)               | 30 (8.3)         |
| Adjusted OR (95% CI) | reference   | <b>1.17 (1.10-1.23)</b> | <b>1.34 (1.22-1.49)</b> | 1.08 (0.74-1.57) |

†The total number of participants was 86,674. Adjusted odds ratios with statistical significance are indicated in bold font.

CI, confidence interval; ELBW, extremely low birth weight (< 1,000 g); LBW, low birth weight (< 2,500 g); OR, odds ratio compared to that of infants of mothers without chronic conditions, adjusted for maternal age at delivery, parity (except for SGA analysis), maternal smoking status, maternal alcohol consumption, maternal educational background, and neonatal sex (except for SGA analysis); PTB, preterm birth before 37 weeks of gestation; SGA, small for gestational age; VLBW, very low birth weight (< 1,500 g); VPTB, preterm birth before 34 weeks of gestation.

**Supplementary Table 4D. Adjusted odds ratios of multimorbidity with domestic violence from intimate partner for adverse perinatal outcomes (n = 86,885)**

| Outcome              | The number of chronic conditions |                         |                              |                           |
|----------------------|----------------------------------|-------------------------|------------------------------|---------------------------|
|                      | 0                                | 1                       | ≥2 without domestic violence | ≥2 with domestic violence |
| <b>PTB</b>           |                                  |                         |                              |                           |
| N (%)                | 2,125<br>(4.1)                   | 1,498 (5.1)             | 122 (7.4)                    | 218 (5.7)                 |
| Adjusted OR (95% CI) | reference                        | <b>1.24 (1.16-1.33)</b> | <b>1.79 (1.48-2.17)</b>      | <b>1.38 (1.19-1.59)</b>   |
| <b>VPTB</b>          |                                  |                         |                              |                           |
| N (%)                | 441 (0.9)                        | 328 (1.1)               | 28 (1.7)                     | 37 (1.0)                  |
| Adjusted OR (95% CI) | reference                        | <b>1.29 (1.12-1.49)</b> | <b>1.88 (1.28-2.77)</b>      | 1.10 (0.78-1.54)          |
| <b>LBW</b>           |                                  |                         |                              |                           |
| N (%)                | 3,775<br>(7.3)                   | 2,661 (9.0)             | 198 (12.0)                   | 379 (9.9)                 |
| Adjusted OR (95% CI) | reference                        | <b>1.27 (1.20-1.33)</b> | <b>1.69 (1.45-1.97)</b>      | <b>1.40 (1.25-1.57)</b>   |
| <b>VLBW</b>          |                                  |                         |                              |                           |
| N (%)                | 248 (0.5)                        | 193 (0.7)               | 14 (0.9)                     | 28 (0.7)                  |
| Adjusted OR (95% CI) | reference                        | <b>1.38 (1.15-1.67)</b> | <b>1.69 (0.98-2.90)</b>      | <b>1.58 (1.06-2.35)</b>   |



|                      |                |                              |                              |                              |
|----------------------|----------------|------------------------------|------------------------------|------------------------------|
| <b>ELBW</b>          |                |                              |                              |                              |
| N (%)                | 108 (0.2)      | 76 (0.3)                     | 7 (0.4)                      | 14 (0.4)                     |
| Adjusted OR (95% CI) | reference      | 1.24 (0.92-<br>1.67)         | 1.95 (0.90-<br>4.20)         | 1.74 (0.99-<br>3.06)         |
| <b>SGA†</b>          |                |                              |                              |                              |
| N (%)                | 3,685<br>(7.1) | 2,443 (8.3)                  | 169 (10.3)                   | 353 (9.3)                    |
| Adjusted OR (95% CI) | reference      | <b>1.17 (1.10-<br/>1.23)</b> | <b>1.46 (1.24-<br/>1.72)</b> | <b>1.27 (1.13-<br/>1.43)</b> |

†The total number of participants was 86,674. Adjusted odds ratios with statistical significance are indicated in bold font.

CI, confidence interval; ELBW, extremely low birth weight (< 1,000 g); LBW, low birth weight (< 2,500 g); OR, odds ratio compared to that of infants of mothers without chronic conditions, adjusted for maternal age at delivery, parity (except for SGA analysis), maternal smoking status, maternal alcohol consumption, maternal educational background, and neonatal sex (except for SGA analysis); PTB, preterm birth before 37 weeks of gestation; SGA, small for gestational age; VLBW, very low birth weight (< 1,500 g); VPTB, preterm birth before 34 weeks of gestation.

STROBE Statement—Checklist of items that should be included in reports of *cohort studies*

|                           | Item No | Recommendation                                                                                                                                                                                                                                                                                                         | Page No |
|---------------------------|---------|------------------------------------------------------------------------------------------------------------------------------------------------------------------------------------------------------------------------------------------------------------------------------------------------------------------------|---------|
| <b>Title and abstract</b> | 1       | (a) Indicate the study's design with a commonly used term in the title or the abstract<br>(b) Provide in the abstract an informative and balanced summary of what was done and what was found                                                                                                                          | 1-4     |
| <b>Introduction</b>       |         |                                                                                                                                                                                                                                                                                                                        |         |
| Background/rationale      | 2       | Explain the scientific background and rationale for the investigation being reported                                                                                                                                                                                                                                   | 6-8     |
| Objectives                | 3       | State specific objectives, including any prespecified hypotheses                                                                                                                                                                                                                                                       | 8       |
| <b>Methods</b>            |         |                                                                                                                                                                                                                                                                                                                        |         |
| Study design              | 4       | Present key elements of study design early in the paper                                                                                                                                                                                                                                                                | 9       |
| Setting                   | 5       | Describe the setting, locations, and relevant dates, including periods of recruitment, exposure, follow-up, and data collection                                                                                                                                                                                        | 9-10    |
| Participants              | 6       | (a) Give the eligibility criteria, and the sources and methods of selection of participants. Describe methods of follow-up<br>(b) For matched studies, give matching criteria and number of exposed and unexposed                                                                                                      | 9-10    |
| Variables                 | 7       | Clearly define all outcomes, exposures, predictors, potential confounders, and effect modifiers. Give diagnostic criteria, if applicable                                                                                                                                                                               | 10-15   |
| Data sources/measurement  | 8*      | For each variable of interest, give sources of data and details of methods of assessment (measurement). Describe comparability of assessment methods if there is more than one group                                                                                                                                   | 10-15   |
| Bias                      | 9       | Describe any efforts to address potential sources of bias                                                                                                                                                                                                                                                              | 15-16   |
| Study size                | 10      | Explain how the study size was arrived at                                                                                                                                                                                                                                                                              | 9       |
| Quantitative variables    | 11      | Explain how quantitative variables were handled in the analyses. If applicable, describe which groupings were chosen and why                                                                                                                                                                                           | 13-15   |
| Statistical methods       | 12      | (a) Describe all statistical methods, including those used to control for confounding<br>(b) Describe any methods used to examine subgroups and interactions<br>(c) Explain how missing data were addressed<br>(d) If applicable, explain how loss to follow-up was addressed<br>(e) Describe any sensitivity analyses | 15-16   |
| <b>Results</b>            |         |                                                                                                                                                                                                                                                                                                                        |         |
| Participants              | 13*     | (a) Report numbers of individuals at each stage of study—eg numbers potentially eligible, examined for eligibility, confirmed eligible, included in the study, completing follow-up, and analysed<br>(b) Give reasons for non-participation at each stage<br>(c) Consider use of a flow diagram                        | 17      |
| Descriptive data          | 14*     | (a) Give characteristics of study participants (eg demographic, clinical, social) and information on exposures and potential confounders<br>(b) Indicate number of participants with missing data for each variable of interest<br>(c) Summarise follow-up time (eg, average and total amount)                         | 17      |
| Outcome data              | 15*     | Report numbers of outcome events or summary measures over time                                                                                                                                                                                                                                                         | 17-18   |

|    |                          |    |                                                                                                                                                                                                              |       |
|----|--------------------------|----|--------------------------------------------------------------------------------------------------------------------------------------------------------------------------------------------------------------|-------|
| 1  | Main results             | 16 | (a) Give unadjusted estimates and, if applicable, confounder-adjusted estimates and their precision (eg, 95% confidence interval). Make clear which confounders were adjusted for and why they were included | 17-18 |
| 2  |                          |    | (b) Report category boundaries when continuous variables were categorized                                                                                                                                    |       |
| 3  |                          |    | (c) If relevant, consider translating estimates of relative risk into absolute risk for a meaningful time period                                                                                             |       |
| 4  |                          |    |                                                                                                                                                                                                              |       |
| 5  |                          |    |                                                                                                                                                                                                              |       |
| 6  |                          |    |                                                                                                                                                                                                              |       |
| 7  |                          |    |                                                                                                                                                                                                              |       |
| 8  |                          |    |                                                                                                                                                                                                              |       |
| 9  | Other analyses           | 17 | Report other analyses done—eg analyses of subgroups and interactions, and sensitivity analyses                                                                                                               | 18    |
| 10 |                          |    |                                                                                                                                                                                                              |       |
| 11 | <b>Discussion</b>        |    |                                                                                                                                                                                                              |       |
| 12 |                          |    |                                                                                                                                                                                                              |       |
| 13 | Key results              | 18 | Summarise key results with reference to study objectives                                                                                                                                                     | 20    |
| 14 | Limitations              | 19 | Discuss limitations of the study, taking into account sources of potential bias or imprecision. Discuss both direction and magnitude of any potential bias                                                   | 20-21 |
| 15 |                          |    |                                                                                                                                                                                                              |       |
| 16 | Interpretation           | 20 | Give a cautious overall interpretation of results considering objectives, limitations, multiplicity of analyses, results from similar studies, and other relevant evidence                                   | 21-26 |
| 17 |                          |    |                                                                                                                                                                                                              |       |
| 18 |                          |    |                                                                                                                                                                                                              |       |
| 19 | Generalisability         | 21 | Discuss the generalisability (external validity) of the study results                                                                                                                                        | 26    |
| 20 |                          |    |                                                                                                                                                                                                              |       |
| 21 | <b>Other information</b> |    |                                                                                                                                                                                                              |       |
| 22 | Funding                  | 22 | Give the source of funding and the role of the funders for the present study and, if applicable, for the original study on which the present article is based                                                | 28    |
| 23 |                          |    |                                                                                                                                                                                                              |       |
| 24 |                          |    |                                                                                                                                                                                                              |       |

25  
26 \*Give information separately for exposed and unexposed groups.

27  
28 **Note:** An Explanation and Elaboration article discusses each checklist item and gives methodological background and  
29 published examples of transparent reporting. The STROBE checklist is best used in conjunction with this article (freely  
30 available on the Web sites of PLoS Medicine at <http://www.plosmedicine.org/>, Annals of Internal Medicine at  
31 <http://www.annals.org/>, and Epidemiology at <http://www.epidem.com/>). Information on the STROBE Initiative is  
32 available at <http://www.strobe-statement.org>.  
33  
34  
35  
36  
37  
38  
39  
40  
41  
42  
43  
44  
45  
46  
47  
48  
49  
50  
51  
52  
53  
54  
55  
56  
57  
58  
59  
60
