# Supplementary material for: Association between maternal multimorbidity and preterm birth, low birth weight and small for gestational age: a prospective birth cohort study from the Japan Environment and Children’s Study
Source: PubMed Central journal article supplement — BMJ Open. 2023 Mar 15;13(3):e069281. doi: 10.1136/bmjopen-2022-069281 (PMC10030623; doi:10.1136/bmjopen-2022-069281), 2023-03-15
Supplement: bmjopen-2022-069281supp001.pdf [file bmjopen-2022-069281supp001.pdf]

## **Supplementary Appendix 1. Recruitment strategies in the Japan Environment and Children's Study**

We attempted to contact as many expected mothers living in study areas as possible. The recruitment rate was targeted more than 50% of all eligible mothers. Either or both of the following two recruitment protocols were applied: 1) recruitment at cooperating health care providers, such as obstetric facilities, at the time of the first prenatal examination (provider-mediated community-based recruitment); 2) recruitment at local government offices issuing pregnancy journals, namely Mother-Child Health Handbooks (the Mother-Child Health Handbook was an official booklet provided complimentary to all expecting mothers in Japan when they became pregnant to receive municipal services for pregnancy, delivery, and childcare). Written informed consent for participation in the study was obtained from individual mothers and their partners, and for children, from their parents or guardian. The study participants were free to withdraw at any moment. Women who refused their consent to study protocol and those who were unreachable during pregnancy, were excluded. In Japan, expecting mothers usually return to their parents' homes to give birth. Those who planned to return to their parents' homes were not eligible unless they were near one of the regional centers. Though we carefully planned the sampling, the recruitment was not entirely random. Both health care providers and local government facilities participated in the recruitment activities. We made every effort to reach out to as many eligible women in the study areas as possible. The representativeness of the JECS samples would be evaluated when the birth data were fixed. (Reference No. 30: Kawamoto T, et al. Rationale and study design of the Japan environment and children's study (JECS). *BMC Public Health*. 2014;14:25.)

**Supplementary Appendix 2. Medication list in the Japan Environment and Children's Study (Nishigori H, et al. Drug use before and during pregnancy in Japan: the Japan environment and children's study. *Pharmacy (Basel)*. 2017;5.)**

**Antibacterial, Antiviral, Antifungal, Carcinostatic drugs**

- 0 Antimicrobial
- 1 Antiviral
- 2 Antifungal
- 3 Carcinostatic

**Corticosteroids**

- 4 Corticosteroids: oral administration, inhalation, infusion
- 5 Corticosteroids: external use, enema

**Antipyretic, Analgesic drugs**

- 6 Antipyretic, Analgesic, Medicine for common cold: prescription
- 7 Antipyretic, Analgesic, Medicine for common cold: over the counter
- 8 Poultice which the analgesic is included in

**Antirheumatic drugs**

- 9 Immunosuppressant, Immunoregulation
- 10 Infliximab, Etanercept
- 11 Antirheumatic drug unidentified in detail

**Antiallergy drugs**

- 12 Antiallergic drug (oral administration, inhalation, nasal drip, tape, Antihistaminic)

**Respiratory drugs**

- 13  $\beta$  stimulative (oral administration, inhalation)
- 14 Nontypeable inhalant

15 Antitussive, Expectorant

16 Theophylline

17 Other respiratory drug

#### **Antidiabetic drugs, Antihyperlipidemic drugs**

21 Insulin preparation

22 Hypoglycemic tablet

23 Antihyperlipidemic

24 Antigout

#### **Hormone-related drugs**

25 Thyroid hormone preparation/levothyroxine sodium

26 Antithyroid/Thiamazole

27 Other hormone drugs

#### **Blood-related drugs**

28 Iron preparation

29 Other blood-related

#### **Cardiovascular drugs**

31 Antihypertensive (including diuretic)

32 Pressor

33 Antiarrhythmic, Antianginal

34 Heart failure therapeutic

35 Other cardiovascular drugs

#### **Gastrointestinal drugs**

36 Antiulcer (Proton pump inhibitor, H2 blocker)

37 General gastrointestinal agents

38 Other gastrointestinal agents

**Psychoactive drugs**

- 41 Selective serotonin reuptake inhibitors (SSRI)
- 42 Antidepressant drug except the SSRI
- 43 Antianxiety
- 44 Sleeping pill
- 45 Antipsychotic
- 46 Valproic acid
- 47 Antiepileptic except the above
- 48 Lithium carbonate
- 49 Other psychoactive drugs

**Perinatal drugs**

- 51 Utero relaxants
- 52 Utero-tonic
- 53 Ovulation inducing
- 54 Other perinatal related drugs

**Other drugs**

- 61 Anesthetic, pain block injection
- 62 Chinese herbal medicines
- 63 External application (non-identified contents)
- 64 Injection, Drip infusion (non-identified contents)
- 65 Bone and Calcium metabolism
- 66 Antimigraine headache
- 67 Muscle relaxant
- 68 Antiemetic drug
- 69 AntiParkinson

70 Hemorrhoids

**Supplements, vitamins/minerals**

71 Vitamin A

72 Vitamin B

73 Vitamin C

74 Vitamin D

75 Vitamin E

76 Folic acid

77 Minerals

78 Multi vitamins supplement

79 Total supplement

**Illegal drugs**

80 Marijuana

81 Psychostimulant

82 Ecstasy

83 Thinner

84 Toluene

85 Other illegal drugs

**90 Vaccines**

**98 Drugs not included in the list mentioned above**

**99 Forgot the drug name**

**Supplementary Table 1. All maternal characteristics (n = 86,885)**

| Characteristics                         | The number of chronic conditions |                      |                      |                      |
|-----------------------------------------|----------------------------------|----------------------|----------------------|----------------------|
|                                         | Total                            | 0 (n =<br>51,964)    | 1 (n =<br>29,459)    | ≥2 (n =<br>5,462)    |
| Maternal age<br>(years)                 |                                  |                      |                      |                      |
| ≤ 24                                    | 8,599 (9.9)                      | 4,451 (8.6)          | 3,342 (11.3)         | 806 (14.8)           |
| 25-29                                   | 23,873 (27.5)                    | 14,205 (27.3)        | 8,232 (27.9)         | 1,436 (26.3)         |
| 30-34                                   | 30,686 (35.3)                    | 18,776 (36.1)        | 10,142 (34.4)        | 1,768 (32.4)         |
| 35-39                                   | 19,703 (22.7)                    | 12,121 (23.3)        | 6,381 (21.7)         | 1,201 (22.0)         |
| ≥ 40                                    | 4,018 (4.6)                      | 2,409 (4.6)          | 1,359 (4.6)          | 250 (4.6)            |
| Missing                                 | 6 (0.01)                         | 2 (0.00)             | 3 (0.01)             | 1 (0.02)             |
| Body mass<br>index (kg/m <sup>2</sup> ) | 20.5<br>(13.2–52.8)              | 20.7 (18.5–<br>24.9) | 20.0 (13.2–<br>48.8) | 19.5 (13.3–<br>52.8) |
| Parity                                  |                                  |                      |                      |                      |
| 0                                       | 35,973 (41.4)                    | 21,952 (42.2)        | 11,972 (40.6)        | 2,049 (37.5)         |
| 1                                       | 31,810 (36.6)                    | 19,030 (36.6)        | 10,750 (36.5)        | 2,030 (37.2)         |
| ≥ 2                                     | 17,040 (19.6)                    | 9,691 (18.7)         | 6,059 (20.6)         | 1,290 (23.6)         |
| Missing                                 | 2,062 (2.4)                      | 1,291 (2.5)          | 678 (2.3)            | 93 (1.7)             |
| Smoking<br>during<br>pregnancy          |                                  |                      |                      |                      |
| No                                      | 49,414 (56.9)                    | 31,028 (59.7)        | 15,937 (54.1)        | 2,449 (44.8)         |

|                                 |               |               |               |              |
|---------------------------------|---------------|---------------|---------------|--------------|
| Quit before pregnancy           | 20,152 (23.2) | 12,094 (23.3) | 6,777 (23.0)  | 1,281 (23.5) |
| Quit after pregnancy            | 12,042 (13.9) | 6,320 (12.2)  | 4,613 (15.7)  | 1,109 (20.3) |
| Yes                             | 3,859 (4.4)   | 1,757 (3.4)   | 1,604 (5.4)   | 498 (9.1)    |
| Missing                         | 1,418 (1.6)   | 765 (1.5)     | 528 (1.8)     | 125 (2.3)    |
| Drinking during pregnancy       |               |               |               |              |
| No                              | 28,652 (33.0) | 16,928 (32.6) | 9,957 (33.8)  | 1,767 (32.4) |
| Quit before pregnancy           | 14,108 (16.2) | 8,321 (16.0)  | 4,832 (16.4)  | 955 (17.5)   |
| Quit after pregnancy            | 40,354 (46.5) | 24,554 (47.3) | 13,378 (45.4) | 2,422 (44.3) |
| Yes                             | 2,370 (2.7)   | 1,386 (2.7)   | 771 (2.6)     | 213 (3.9)    |
| Missing                         | 1,401 (1.6)   | 775 (1.5)     | 521 (1.8)     | 105 (1.9)    |
| Maternal educational background |               |               |               |              |
| Junior high school              | 4,089 (4.7)   | 1,814 (3.5)   | 1,730 (5.9)   | 545 (10.0)   |
| High school                     | 27,106 (31.2) | 15,266 (29.4) | 9,738 (33.1)  | 2,102 (38.5) |
| Technical junior college or     | 36,123 (41.6) | 22,182 (42.7) | 11,949 (40.6) | 1,992 (36.5) |

|                                     |               |               |              |              |
|-------------------------------------|---------------|---------------|--------------|--------------|
| technical/<br>vocational<br>college |               |               |              |              |
| University or<br>above              | 18,415 (21.2) | 12,062 (23.2) | 5,626 (19.1) | 727 (13.3)   |
| Missing                             | 1,152 (1.3)   | 640 (1.2)     | 416 (1.4)    | 96 (1.8)     |
| Household<br>income (JPY)           |               |               |              |              |
| < 2,000,000                         | 4,538 (5.2)   | 2,176 (4.2)   | 1,838 (6.2)  | 524 (9.6)    |
| 2,000,000–<br>3,990,000             | 27,625 (31.8) | 15,817 (30.4) | 9,815 (33.3) | 1,993 (36.5) |
| 4,000,000–<br>5,990,000             | 26,440 (30.4) | 16,369 (31.5) | 8,587 (29.2) | 1,484 (27.2) |
| 6,000,000–<br>7,990,000             | 12,757 (14.7) | 8,188 (15.8)  | 4,019 (13.6) | 550 (10.1)   |
| 8,000,000–<br>9,990,000             | 5,298 (6.1)   | 3,384 (6.5)   | 1,675 (5.7)  | 239 (4.4)    |
| ≥ 10,000,000                        | 3,400 (3.9)   | 2,174 (4.2)   | 1,043 (3.5)  | 183 (3.4)    |
| Missing                             | 6,827 (7.9)   | 3,856 (7.4)   | 2,482 (8.4)  | 489 (9.0)    |

Values are presented as n (%) or median (range: min–max)



**Supplementary Table 2. Crude and adjusted odds ratios of maternal chronic conditions for adverse perinatal outcomes in the complete dataset (n = 76,931)**

| Outcome              | The number of chronic conditions |                         |                         |
|----------------------|----------------------------------|-------------------------|-------------------------|
|                      | 0                                | 1                       | ≥2                      |
| <b>PTB</b>           |                                  |                         |                         |
| N (%)                | 1,838 (4.0)                      | 1,253 (4.8)             | 290 (6.0)               |
| Crude OR (95% CI)    | reference                        | 1.23 (1.14-1.32)        | 1.55 (1.37-1.77)        |
| Adjusted OR (95% CI) | reference                        | <b>1.21 (1.13-1.31)</b> | <b>1.49 (1.31-1.70)</b> |
| <b>VPTB</b>          |                                  |                         |                         |
| N (%)                | 354 (0.8)                        | 259 (1.0)               | 48 (1.0)                |
| Crude OR (95% CI)    | reference                        | 1.31 (1.11-1.54)        | 1.31 (0.97-1.77)        |
| Adjusted OR (95% CI) | reference                        | <b>1.28 (1.09-1.50)</b> | 1.23 (0.91-1.67)        |
| <b>LBW</b>           |                                  |                         |                         |
| N (%)                | 3,307 (7.2)                      | 2,247 (8.7)             | 491 (10.2)              |
| Crude OR (95% CI)    | reference                        | 1.23 (1.17-1.30)        | 1.48 (1.34-1.64)        |
| Adjusted OR (95% CI) | reference                        | <b>1.23 (1.16-1.30)</b> | <b>1.45 (1.31-1.61)</b> |
| <b>VLBW</b>          |                                  |                         |                         |
| N (%)                | 193 (0.4)                        | 141 (0.5)               | 29 (0.6)                |
| Crude OR (95% CI)    | reference                        | 1.31 (1.05-1.62)        | 1.45 (0.98-2.15)        |
| Adjusted OR (95% CI) | reference                        | <b>1.30 (1.04-1.61)</b> | 1.41 (0.95-2.10)        |
| <b>ELBW</b>          |                                  |                         |                         |
| N (%)                | 71 (0.2)                         | 43 (0.2)                | 13 (0.3)                |
| Crude OR (95% CI)    | reference                        | 1.08 (0.74-1.58)        | 1.77 (0.98-3.19)        |
| Adjusted OR (95% CI) | reference                        | 1.06 (0.72-1.55)        | 1.61 (0.89-2.95)        |

| SGA†                 |             |                         |                         |
|----------------------|-------------|-------------------------|-------------------------|
| N (%)                | 3,249 (7.0) | 2,100 (8.1)             | 455 (9.5)               |
| Crude OR (95% CI)    | reference   | 1.17 (1.10-1.24)        | 1.39 (1.25-1.54)        |
| Adjusted OR (95% CI) | reference   | <b>1.15 (1.09-1.22)</b> | <b>1.33 (1.20-1.47)</b> |

†The total number of participants was 76,740. Adjusted odds ratios with statistical significance are indicated in bold font.

CI, confidence interval; ELBW, extremely low birth weight (< 1,000 g); LBW, low birth weight (< 2,500 g); OR, odds ratio compared to that of infants of mothers without chronic conditions, adjusted for maternal age at delivery, parity (except for SGA analysis), maternal smoking status, maternal alcohol consumption, maternal educational background, and neonatal sex (except for SGA analysis); PTB, preterm birth before 37 weeks of gestation; SGA, small for gestational age; VLBW, very low birth weight (< 1,500 g); VPTB, preterm birth before 34 weeks of gestation.

**Supplementary Table 3. Adverse perinatal outcomes in maternal multimorbidity categorized in detail (n = 86,885)**

| Outcome              | The number of chronic conditions |                         |                         |                         |                  | <i>P</i> value for trend |
|----------------------|----------------------------------|-------------------------|-------------------------|-------------------------|------------------|--------------------------|
|                      | 0<br>(n =<br>51,964)             | 1<br>(n = 29,459)       | 2<br>(n = 5,039)        | 3<br>(n = 385)          | ≥4<br>(n = 38)   |                          |
| <b>PTB</b>           |                                  |                         |                         |                         |                  |                          |
| N (%)                | 2,125 (4.1)                      | 1,498 (5.1)             | 301 (6.0)               | 36 (9.4)                | 3 (7.9)          |                          |
| Crude OR (95% CI)    | reference                        | 1.26 (1.17-1.34)        | 1.49 (1.32-1.69)        | 2.42 (1.71-3.42)        | 2.01 (0.62-6.54) |                          |
| Adjusted OR (95% CI) | reference                        | <b>1.24 (1.16-1.33)</b> | <b>1.44 (1.27-1.64)</b> | <b>2.30 (1.62-3.26)</b> | 1.72 (0.53-5.62) | < 0.001                  |
| <b>LBW</b>           |                                  |                         |                         |                         |                  |                          |
| N (%)                | 3,775 (7.3)                      | 2,661 (9.0)             | 525 (10.4)              | 46 (12.0)               | 6 (15.8)         |                          |
| Crude OR (95% CI)    | reference                        | 1.27 (1.20-1.33)        | 1.48 (1.35-1.63)        | 1.73 (1.27-2.36)        | 2.39 (1.00-5.73) |                          |
| Adjusted OR (95% CI) | reference                        | <b>1.26 (1.20-1.34)</b> | <b>1.47 (1.33-1.62)</b> | <b>1.66 (1.22-2.27)</b> | 2.09 (0.86-5.05) | < 0.001                  |
| <b>SGA†</b>          |                                  |                         |                         |                         |                  |                          |
| N (%)                | 3,685 (7.1)                      | 2,443 (8.3)             | 483 (9.6)               | 33 (8.6)                | 6 (15.8)         |                          |
| Crude OR (95% CI)    | reference                        | 1.18 (1.12-1.25)        | 1.39 (1.26-1.54)        | 1.23 (0.86-1.76)        | 2.45 (1.02-5.86) |                          |

|                      |           |                         |                         |                  |                  |         |
|----------------------|-----------|-------------------------|-------------------------|------------------|------------------|---------|
| Adjusted OR (95% CI) | reference | <b>1.17 (1.10-1.23)</b> | <b>1.33 (1.21-1.48)</b> | 1.14 (0.80-1.63) | 2.19 (0.91-5.27) | < 0.001 |
|----------------------|-----------|-------------------------|-------------------------|------------------|------------------|---------|

†The total number of participants was 86,674. Adjusted odds ratios with statistical significance are indicated in bold font.

CI, confidence interval; LBW, low birth weight (< 2,500 g); OR, odds ratio compared to that of infants of mothers without chronic conditions, adjusted for maternal age at delivery, parity (except for SGA analysis), maternal smoking status, maternal alcohol consumption, maternal educational background, and neonatal sex (except for SGA analysis); PTB, preterm birth before 37 weeks of gestation; SGA, small for gestational age.

**Supplementary Table 4A. Adjusted odds ratios of multimorbidity with underweight for adverse perinatal outcomes (n = 86,885)**

| Outcome              | The number of chronic conditions |                         |                         |                         |
|----------------------|----------------------------------|-------------------------|-------------------------|-------------------------|
|                      | 0                                | 1                       | ≥2 without underweight  | ≥2 with underweight     |
| <b>PTB</b>           |                                  |                         |                         |                         |
| N (%)                | 2,125 (4.1)                      | 1,498 (5.1)             | 207 (7.1)               | 133 (5.2)               |
| Adjusted OR (95% CI) | reference                        | <b>1.24 (1.16-1.33)</b> | <b>1.69 (1.46-1.96)</b> | <b>1.28 (1.07-1.54)</b> |
| <b>VPTB</b>          |                                  |                         |                         |                         |
| N (%)                | 441 (0.9)                        | 328 (1.1)               | 44 (1.5)                | 21 (0.8)                |
| Adjusted OR (95% CI) | reference                        | <b>1.29 (1.12-1.49)</b> | <b>1.64 (1.20-2.25)</b> | 0.97 (0.62-1.50)        |
| <b>LBW</b>           |                                  |                         |                         |                         |
| N (%)                | 3,775 (7.3)                      | 2,661 (9.0)             | 266 (9.1)               | 311 (12.2)              |
| Adjusted OR (95% CI) | reference                        | <b>1.27 (1.20-1.33)</b> | <b>1.25 (1.09-1.42)</b> | <b>1.78 (1.57-2.01)</b> |
| <b>VLBW</b>          |                                  |                         |                         |                         |
| N (%)                | 248 (0.5)                        | 193 (0.7)               | 27 (0.9)                | 15 (0.6)                |
| Adjusted OR (95% CI) | reference                        | <b>1.39 (1.15-1.67)</b> | <b>1.89 (1.27-2.84)</b> | 1.28 (0.76-2.16)        |
| <b>ELBW</b>          |                                  |                         |                         |                         |

|                      |             |                         |                         |                         |
|----------------------|-------------|-------------------------|-------------------------|-------------------------|
| N (%)                | 108 (0.2)   | 76 (0.3)                | 13 (0.5)                | 8 (0.3)                 |
| Adjusted OR (95% CI) | reference   | 1.24 (0.92-1.67)        | <b>2.03 (1.13-3.63)</b> | 1.54 (0.75-3.12)        |
| <b>SGA†</b>          |             |                         |                         |                         |
| N (%)                | 3,685 (7.1) | 2,443 (8.3)             | 205 (7.1)               | 317 (12.5)              |
| Adjusted OR (95% CI) | reference   | <b>1.17 (1.10-1.23)</b> | 0.94 (0.81-1.09)        | <b>1.80 (1.59-2.04)</b> |

†The total number of participants was 86,674. Adjusted odds ratios with statistical significance are indicated in bold font.

CI, confidence interval; ELBW, extremely low birth weight (< 1,000 g); LBW, low birth weight (< 2,500 g); OR, odds ratio compared to that of infants of mothers without chronic conditions, adjusted for maternal age at delivery, parity (except for SGA analysis), maternal smoking status, maternal alcohol consumption, maternal educational background, and neonatal sex (except for SGA analysis); PTB, preterm birth before 37 weeks of gestation; SGA, small for gestational age; VLBW, very low birth weight (< 1,500 g); VPTB, preterm birth before 34 weeks of gestation.

**Supplementary Table 4B. Adjusted odds ratios of multimorbidity with obesity for adverse perinatal outcomes (n = 86,885)**

| Outcome              | The number of chronic conditions |                         |                         |                         |
|----------------------|----------------------------------|-------------------------|-------------------------|-------------------------|
|                      | 0                                | 1                       | ≥2 without obesity      | ≥2 with obesity         |
| <b>PTB</b>           |                                  |                         |                         |                         |
| N (%)                | 2,125<br>(4.1)                   | 1,498 (5.1)             | 185 (5.4)               | 155 (7.5)               |
| Adjusted OR (95% CI) | reference                        | <b>1.24 (1.16-1.33)</b> | <b>1.33 (1.14-1.56)</b> | <b>1.78 (1.50-2.11)</b> |
| <b>VPTB</b>          |                                  |                         |                         |                         |
| N (%)                | 441 (0.9)                        | 328 (1.1)               | 28 (0.8)                | 37 (1.8)                |
| Adjusted OR (95% CI) | reference                        | <b>1.29 (1.12-1.49)</b> | 0.95 (0.65-1.40)        | <b>1.93 (1.37-2.72)</b> |
| <b>LBW</b>           |                                  |                         |                         |                         |
| N (%)                | 3,775<br>(7.3)                   | 2,661 (9.0)             | 383 (11.3)              | 194 (9.4)               |
| Adjusted OR (95% CI) | reference                        | <b>1.27 (1.20-1.34)</b> | <b>1.61 (1.44-1.80)</b> | <b>1.29 (1.10-1.50)</b> |
| <b>VLBW</b>          |                                  |                         |                         |                         |
| N (%)                | 248 (0.5)                        | 193 (0.7)               | 20 (0.6)                | 22 (1.1)                |
| Adjusted OR (95% CI) | reference                        | <b>1.39 (1.15-1.68)</b> | 1.27 (0.80-2.00)        | <b>2.16 (1.39-3.36)</b> |
| <b>ELBW</b>          |                                  |                         |                         |                         |

|                      |             |                         |                         |                         |
|----------------------|-------------|-------------------------|-------------------------|-------------------------|
| N (%)                | 108 (0.2)   | 76 (0.3)                | 9 (0.3)                 | 12 (0.6)                |
| Adjusted OR (95% CI) | reference   | 1.24 (0.92-1.67)        | 1.28 (0.64-2.53)        | <b>2.64 (1.44-4.83)</b> |
| <b>SGA†</b>          |             |                         |                         |                         |
| N (%)                | 3,685 (7.1) | 2,443 (8.3)             | 380 (11.2)              | 142 (6.9)               |
| Adjusted OR (95% CI) | reference   | <b>1.17 (1.10-1.23)</b> | <b>1.59 (1.42-1.78)</b> | 0.92 (0.77-1.09)        |

†The total number of participants was 86,674. Adjusted odds ratios with statistical significance are indicated in bold font.

CI, confidence interval; ELBW, extremely low birth weight (< 1,000 g); LBW, low birth weight (< 2,500 g); OR, odds ratio compared to that of infants of mothers without chronic conditions, adjusted for maternal age at delivery, parity (except for SGA analysis), maternal smoking status, maternal alcohol consumption, maternal educational background, and neonatal sex (except for SGA analysis); PTB, preterm birth before 37 weeks of gestation; SGA, small for gestational age; VLBW, very low birth weight (< 1,500 g); VPTB, preterm birth before 34 weeks of gestation.



**Supplementary Table 4C. Adjusted odds ratios of multimorbidity with psychiatric disorder for adverse perinatal outcomes (n = 86,885)**

| Outcome              | The number of chronic conditions |                         |                                 |                              |
|----------------------|----------------------------------|-------------------------|---------------------------------|------------------------------|
|                      | 0                                | 1                       | ≥2 without psychiatric disorder | ≥2 with psychiatric disorder |
| <b>PTB</b>           |                                  |                         |                                 |                              |
| N (%)                | 2,125 (4.1)                      | 1,498 (5.1)             | 309 (6.1)                       | 31 (8.6)                     |
| Adjusted OR (95% CI) | reference                        | <b>1.24 (1.16-1.33)</b> | <b>1.47 (1.30-1.66)</b>         | <b>1.99 (1.36-2.89)</b>      |
| <b>VPTB</b>          |                                  |                         |                                 |                              |
| N (%)                | 441 (0.9)                        | 328 (1.1)               | 62 (1.2)                        | 3 (0.8)                      |
| Adjusted OR (95% CI) | reference                        | <b>1.29 (1.11-1.49)</b> | <b>1.38 (1.05-1.81)</b>         | 0.84 (0.27-2.63)             |
| <b>LBW</b>           |                                  |                         |                                 |                              |
| N (%)                | 3,775 (7.3)                      | 2,661 (9.0)             | 536 (10.5)                      | 41 (11.4)                    |
| Adjusted OR (95% CI) | reference                        | <b>1.27 (1.20-1.34)</b> | <b>1.49 (1.35-1.64)</b>         | <b>1.45 (1.04-2.02)</b>      |
| <b>VLBW</b>          |                                  |                         |                                 |                              |
| N (%)                | 248 (0.5)                        | 193 (0.7)               | 39 (0.8)                        | 3 (0.8)                      |
| Adjusted OR (95% CI) | reference                        | <b>1.39 (1.15-1.67)</b> | <b>1.62 (1.15-2.28)</b>         | 1.58 (0.50-4.96)             |

|                      |             |                         |                         |                  |
|----------------------|-------------|-------------------------|-------------------------|------------------|
| <b>ELBW</b>          |             |                         |                         |                  |
| N (%)                | 108 (0.2)   | 76 (0.3)                | 20 (0.4)                | 1 (0.3)          |
| Adjusted OR (95% CI) | reference   | 1.24 (0.92-1.67)        | <b>1.86 (1.15-3.02)</b> | 1.14 (0.16-8.25) |
| <b>SGA†</b>          |             |                         |                         |                  |
| N (%)                | 3,685 (7.1) | 2,443 (8.3)             | 492 (9.7)               | 30 (8.3)         |
| Adjusted OR (95% CI) | reference   | <b>1.17 (1.10-1.23)</b> | <b>1.34 (1.22-1.49)</b> | 1.08 (0.74-1.57) |

†The total number of participants was 86,674. Adjusted odds ratios with statistical significance are indicated in bold font.

CI, confidence interval; ELBW, extremely low birth weight (< 1,000 g); LBW, low birth weight (< 2,500 g); OR, odds ratio compared to that of infants of mothers without chronic conditions, adjusted for maternal age at delivery, parity (except for SGA analysis), maternal smoking status, maternal alcohol consumption, maternal educational background, and neonatal sex (except for SGA analysis); PTB, preterm birth before 37 weeks of gestation; SGA, small for gestational age; VLBW, very low birth weight (< 1,500 g); VPTB, preterm birth before 34 weeks of gestation.

**Supplementary Table 4D. Adjusted odds ratios of multimorbidity with domestic violence from intimate partner for adverse perinatal outcomes (n = 86,885)**

| Outcome              | The number of chronic conditions |                         |                              |                           |
|----------------------|----------------------------------|-------------------------|------------------------------|---------------------------|
|                      | 0                                | 1                       | ≥2 without domestic violence | ≥2 with domestic violence |
| <b>PTB</b>           |                                  |                         |                              |                           |
| N (%)                | 2,125 (4.1)                      | 1,498 (5.1)             | 122 (7.4)                    | 218 (5.7)                 |
| Adjusted OR (95% CI) | reference                        | <b>1.24 (1.16-1.33)</b> | <b>1.79 (1.48-2.17)</b>      | <b>1.38 (1.19-1.59)</b>   |
| <b>VPTB</b>          |                                  |                         |                              |                           |
| N (%)                | 441 (0.9)                        | 328 (1.1)               | 28 (1.7)                     | 37 (1.0)                  |
| Adjusted OR (95% CI) | reference                        | <b>1.29 (1.12-1.49)</b> | <b>1.88 (1.28-2.77)</b>      | 1.10 (0.78-1.54)          |
| <b>LBW</b>           |                                  |                         |                              |                           |
| N (%)                | 3,775 (7.3)                      | 2,661 (9.0)             | 198 (12.0)                   | 379 (9.9)                 |
| Adjusted OR (95% CI) | reference                        | <b>1.27 (1.20-1.33)</b> | <b>1.69 (1.45-1.97)</b>      | <b>1.40 (1.25-1.57)</b>   |
| <b>VLBW</b>          |                                  |                         |                              |                           |
| N (%)                | 248 (0.5)                        | 193 (0.7)               | 14 (0.9)                     | 28 (0.7)                  |
| Adjusted OR (95% CI) | reference                        | <b>1.38 (1.15-1.67)</b> | <b>1.69 (0.98-2.90)</b>      | <b>1.58 (1.06-2.35)</b>   |

|                      |             |                         |                         |                         |
|----------------------|-------------|-------------------------|-------------------------|-------------------------|
| <b>ELBW</b>          |             |                         |                         |                         |
| N (%)                | 108 (0.2)   | 76 (0.3)                | 7 (0.4)                 | 14 (0.4)                |
| Adjusted OR (95% CI) | reference   | 1.24 (0.92-1.67)        | 1.95 (0.90-4.20)        | 1.74 (0.99-3.06)        |
| <b>SGA†</b>          |             |                         |                         |                         |
| N (%)                | 3,685 (7.1) | 2,443 (8.3)             | 169 (10.3)              | 353 (9.3)               |
| Adjusted OR (95% CI) | reference   | <b>1.17 (1.10-1.23)</b> | <b>1.46 (1.24-1.72)</b> | <b>1.27 (1.13-1.43)</b> |

†The total number of participants was 86,674. Adjusted odds ratios with statistical significance are indicated in bold font.

CI, confidence interval; ELBW, extremely low birth weight (< 1,000 g); LBW, low birth weight (< 2,500 g); OR, odds ratio compared to that of infants of mothers without chronic conditions, adjusted for maternal age at delivery, parity (except for SGA analysis), maternal smoking status, maternal alcohol consumption, maternal educational background, and neonatal sex (except for SGA analysis); PTB, preterm birth before 37 weeks of gestation; SGA, small for gestational age; VLBW, very low birth weight (< 1,500 g); VPTB, preterm birth before 34 weeks of gestation.
